# Supplementary material
Source: PubMed Central journal article supplement (PMC9490921)
Supplement: 12916_2022_2511_MOESM3_ESM.pdf [file 12916_2022_2511_MOESM3_ESM.pdf]

# Additional File 3: Meta-Analysis results

## Summary Tables

|                                                                                               |   |
|-----------------------------------------------------------------------------------------------|---|
| Table 1. Main analysis excluding studies with $\leq 5$ cell counts for exposure-outcome ..... | 2 |
| Table 2. Main analysis excluding studies with $\leq 2$ cell counts for exposure-outcome ..... | 3 |
| Table 3. Main analysis excluding studies with zero cell counts for exposure-outcome .....     | 4 |
| Table 4. Analysis of change excluding studies with $\leq 5$ cell counts .....                 | 5 |
| Table 5. Analysis of change excluding studies with $\leq 2$ cell counts .....                 | 7 |
| Table 6. Analysis of change excluding studies with zero cell counts .....                     | 9 |

## Forest Plots (*Unadjusted, Basic, and Fully adjusted*)

### Drinking behaviours

|                                                                         |    |
|-------------------------------------------------------------------------|----|
| Figure set 1. Currently drinks 4+ days/week or 5+ drinks/occasion ..... | 11 |
| Figure set 2. Increased alcohol consumption .....                       | 14 |
| Figure set 3. Reduced alcohol consumption.....                          | 19 |
| Figure set 4. Currently drinks 5+ drinks/occasion .....                 | 24 |
| Figure set 5. Drinks more alcohol units per occasion .....              | 27 |
| Figure set 6. Drinks fewer alcohol units per occasion.....              | 30 |
| Figure set 7. Currently drinks 4+ days/week.....                        | 33 |
| Figure set 8. Drinks more frequently.....                               | 37 |
| Figure set 9. Drinks less frequently .....                              | 40 |

### Smoking and Vaping

|                                     |    |
|-------------------------------------|----|
| Figure set 10. Current smoker ..... | 43 |
| Figure set 11. Smoking more.....    | 46 |
| Figure set 12. Smoking less.....    | 49 |
| Figure set 13. Current vaper .....  | 52 |
| Figure set 14. Vaping more .....    | 55 |
| Figure set 15. Vaping less .....    | 58 |

Notes: Basic adjustment includes socio-demographic characteristics: age (only in age-heterogeneous studies), sex, ethnicity (except the BCS70 and NCDS cohorts which were nearly entirely white), education, UK nation (except ALSPAC, GS and ELSA which only had participants from a single country), and household composition. Full adjustment additionally includes pre-pandemic measures of psychological distress, self-rated health, and (where appropriate) each outcome behaviours.

**Table 1. Main analysis excluding studies with  $\leq 5$  cell counts for exposure-outcome**

|                    |           | Currently drinks 4+days/week or 5+ drinks/occasion |          |          |       | Current smoker |          |          |       | Current vaper  |          |          |       |
|--------------------|-----------|----------------------------------------------------|----------|----------|-------|----------------|----------|----------|-------|----------------|----------|----------|-------|
|                    |           | RR                                                 | Lower CI | Upper CI | I2%   | RR             | Lower CI | Upper CI | I2%   | RR             | Lower CI | Upper CI | I2%   |
| Furloughed         | Overall   | 1.03                                               | 0.94     | 1.13     | 47.92 | 1.05           | 0.95     | 1.16     | 9.86  | 0.91           | 0.74     | 1.1      | 0     |
|                    | Female    | 0.99                                               | 0.88     | 1.10     | 43.16 | 52             | 1        | 1.25     | 0     | 0.92           | 0.71     | 1.2      | 0     |
|                    | Male      | 1.06                                               | 0.98     | 1.14     | 0.63  | 1.04           | 0.87     | 1.24     | 31.05 | 0.87           | 0.66     | 1.16     | 0     |
|                    | Degree    | 1.03                                               | 0.96     | 1.11     | 0     | 1.01           | 0.9      | 1.13     | 0     | 1.2            | 0.83     | 1.72     | 10.43 |
|                    | No degree | 1.06                                               | 0.93     | 1.20     | 52.47 | 1.07           | 0.97     | 1.17     | 0     | 0.81           | 0.65     | 1.02     | 0     |
|                    | 16-29y    | 0.92                                               | 0.75     | 1.12     | 0     | 1.24           | 0.97     | 1.59     | 0     | 0.88           | 0.5      | 1.57     | 0     |
|                    | 30-49y    | 0.98                                               | 0.89     | 1.09     | 0     | 1.04           | 0.88     | 1.24     | 0     | 0.96           | 0.57     | 1.62     | 54.6  |
|                    | 50+y      | 1.06                                               | 0.97     | 1.16     | 48.17 | 1.03           | 0.89     | 1.2      | 37.38 | 0.94           | 0.75     | 1.17     | 0     |
| No longer employed | Overall   | 1.03                                               | 0.89     | 1.20     | 34.15 | 1.07           | 0.61     | 1.86     | 80.22 | 1.84           | 1        | 3.39     | 46.98 |
|                    | Female    | 1.13                                               | 0.94     | 1.37     | 33.51 | 1.3            | 0.57     | 2.97     | 72.06 | 2.75           | 1.32     | 5.73     | *     |
|                    | Male      | 1.04                                               | 0.90     | 1.20     | 3.14  | 1.25           | 0.23     | 6.82     | 85.82 | 1.19           | 0.66     | 2.15     | *     |
|                    | Degree    | 1.10                                               | 0.97     | 1.25     | 0     | 1.08           | 0.84     | 1.39     | 0     | no information |          |          |       |
|                    | No degree | 1.06                                               | 0.86     | 1.30     | 32.15 | 1.26           | 0.73     | 2.18     | 69.39 | 1.95           | 0.93     | 4.09     |       |
|                    | 16-29y    | 1.07                                               | 0.62     | 1.85     | 56.05 | 1.45           | 0.6      | 3.51     | 75.09 | no information |          |          |       |
|                    | 30-49y    | 0.98                                               | 0.82     | 1.19     | 0     | 0.77           | 0.43     | 1.37     | 0     | 1.96           | 0.42     | 9.29     | 87.47 |
|                    | 50+y      | 1.04                                               | 0.92     | 1.19     | 21.97 | 0.96           | 0.49     | 1.87     | 83.43 | 1.63           | 0.92     | 2.88     | 0     |
| Stable unemployed  | Overall   | 1.09                                               | 0.96     | 1.24     | 0     | 1.1            | 0.94     | 1.3      | 0     | 0.95           | 0.54     | 1.65     | 0     |
|                    | Female    | 1.00                                               | 0.83     | 1.20     | 3.5   | 1.65           | 1.18     | 2.3      | 0     | 0.66           | 0.25     | 1.72     | *     |
|                    | Male      | 1.15                                               | 0.96     | 1.39     | 0     | 0.84           | 0.67     | 1.05     | 0     | no information |          |          |       |
|                    | Degree    | 0.98                                               | 0.70     | 1.36     | 46.26 | 1.03           | 0.8      | 1.34     | 0     |                |          |          |       |
|                    | No degree | 1.09                                               | 0.94     | 1.26     | 0     | 1.17           | 0.99     | 1.39     | 0     | 1.01           | 0.53     | 1.9      | 0     |
|                    | 16-29y    | 1.17                                               | 0.87     | 1.56     | 0     | 1.28           | 0.7      | 2.33     | *     | 1.25           | 0.53     | 2.95     | *     |
|                    | 30-49y    | 1.10                                               | 0.87     | 1.39     | *     | 1.07           | 0.7      | 1.63     | *     | no information |          |          |       |
|                    | 50+y      | 1.05                                               | 0.94     | 1.18     | 0     | 1.04           | 0.89     | 1.22     | 0     | 0.75           | 0.29     | 1.94     | *     |

\* indicates only one study included

**Table 2. Main analysis excluding studies with  $\leq 2$  cell counts for exposure-outcome**

|                    |           | Currently drinks 4+days/week or 5+ drinks/occasion |          |          |       | Current smoker |          |          |       | Current vaper  |          |          |       |
|--------------------|-----------|----------------------------------------------------|----------|----------|-------|----------------|----------|----------|-------|----------------|----------|----------|-------|
|                    |           | RR                                                 | Lower CI | Upper CI | I2%   | RR             | Lower CI | Upper CI | I2%   | RR             | Lower CI | Upper CI | I2%   |
| Furloughed         | Overall   | 1.03                                               | 0.94     | 1.13     | 47.92 | 1.05           | 0.95     | 1.16     | 9.86  | 0.89           | 0.74     | 1.08     | 0     |
|                    | Female    | 0.99                                               | 0.88     | 1.10     | 43.16 | 1.12           | 1        | 1.25     | 0     | 0.92           | 0.71     | 1.2      | 0     |
|                    | Male      | 1.06                                               | 0.98     | 1.14     | 0.63  | 1.04           | 0.87     | 1.24     | 31.05 | 0.89           | 0.67     | 1.16     | 0     |
|                    | Degree    | 1.03                                               | 0.96     | 1.11     | 0     | 1.03           | 0.9      | 1.12     | 0     | 1.2            | 0.88     | 1.65     | 1.58  |
|                    | No degree | 1.06                                               | 0.93     | 1.20     | 52.47 | 1.06           | 0.97     | 1.17     | 0     | 0.81           | 0.65     | 1.02     | 0     |
|                    | 16-29y    | 0.92                                               | 0.75     | 1.12     | 0     | 1.24           | 0.97     | 1.59     | 0     | 0.88           | 0.5      | 1.57     | 0     |
|                    | 30-49y    | 0.98                                               | 0.89     | 1.09     | 0     | 1.04           | 0.88     | 1.24     | 0     | 0.9            | 0.58     | 1.4      | 31.09 |
|                    | 50+y      | 1.06                                               | 0.97     | 1.16     | 48.17 | 1.03           | 0.89     | 1.2      | 37.38 | 0.94           | 0.75     | 1.17     | 0     |
| No longer employed | Overall   | 1.03                                               | 0.89     | 1.20     | 34.15 | 1.02           | 0.66     | 1.56     | 70.57 | 1.51           | 0.92     | 2.5      | 43.69 |
|                    | Female    | 1.12                                               | 0.92     | 1.36     | 29.92 | 1.12           | 0.74     | 1.69     | 52.12 | 2.74           | 1.59     | 4.72     | 0     |
|                    | Male      | 1.03                                               | 0.90     | 1.19     | 0.75  | 1.11           | 0.54     | 2.28     | 76.84 | 1.25           | 0.83     | 1.87     | 0     |
|                    | Degree    | 1.08                                               | 0.96     | 1.22     | 0     | 0.92           | 0.7      | 1.22     | 23.79 | 3.91           | 1.18     | 12.9     | *     |
|                    | No degree | 1.06                                               | 0.86     | 1.30     | 32.15 | 0.93           | 0.62     | 1.41     | 61.88 | 1.51           | 0.89     | 2.55     | 0     |
|                    | 16-29y    | 1.07                                               | 0.62     | 1.85     | 56.05 | 1.45           | 0.6      | 3.51     | 75.09 | 1.77           | 0.36     | 8.61     | 86.17 |
|                    | 30-49y    | 0.98                                               | 0.82     | 1.19     | 0     | 0.77           | 0.43     | 1.37     | 0     | 1.96           | 0.42     | 9.29     | 87.47 |
|                    | 50+y      | 1.04                                               | 0.92     | 1.19     | 21.97 | 0.87           | 0.54     | 1.39     | 67.75 | 1.55           | 0.93     | 2.56     | 0     |
| Stable unemployed  | Overall   | 1.09                                               | 0.96     | 1.24     | 0     | 1.1            | 0.93     | 1.29     | 0     | 0.98           | 0.62     | 1.57     | 0     |
|                    | Female    | 1.08                                               | 0.79     | 1.47     | 18.4  | 1.35           | 1        | 1.82     | 47    | 0.79           | 0.36     | 1.72     | 0     |
|                    | Male      | 1.15                                               | 0.96     | 1.39     | 0     | 0.84           | 0.67     | 1.05     | 0     | 0.89           | 0.36     | 2.21     | 0     |
|                    | Degree    | 0.98                                               | 0.70     | 1.36     | 46.26 | 1.01           | 0.78     | 1.29     | 0     | no information |          |          |       |
|                    | No degree | 1.09                                               | 0.94     | 1.26     | 0     | 1.17           | 0.99     | 1.39     | 0     | 1.01           | 0.53     | 1.9      | 0     |
|                    | 16-29y    | 1.17                                               | 0.87     | 1.56     | 0     | 1.34           | 0.78     | 2.3      | 0     | 1.25           | 0.53     | 2.95     | *     |
|                    | 30-49y    | 1.10                                               | 0.87     | 1.39     | *     | 1.03           | 0.69     | 1.53     | 0     | 0.88           | 0.34     | 2.29     | 0     |
|                    | 50+y      | 1.05                                               | 0.94     | 1.18     | 0     | 1.04           | 0.89     | 1.22     | 0     | 0.9            | 0.45     | 1.77     | 0     |

Note: I2 estimates from stratified models are different to the overall I2 presented in subgroup figures as separate models were run for each group.

\* indicates only one study included

**Table 3. Main analysis excluding studies with zero cell counts for exposure-outcome**

|                       |           | <b>Currently drinks 4+days/week or<br/>5+ drinks/occasion</b> |          |          |       | <b>Current smoker</b> |          |          |       | <b>Current vaper</b> |          |          |       |
|-----------------------|-----------|---------------------------------------------------------------|----------|----------|-------|-----------------------|----------|----------|-------|----------------------|----------|----------|-------|
|                       |           | RR                                                            | Lower CI | Upper CI | I2%   | RR                    | Lower CI | Upper CI | I2%   | RR                   | Lower CI | Upper CI | I2%   |
| Furloughed            | Overall   | 1.03                                                          | 0.94     | 1.13     | 47.92 | 1.05                  | 0.95     | 1.16     | 9.86  | 0.89                 | 0.74     | 1.08     | 0     |
|                       | Female    | 0.99                                                          | 0.88     | 1.10     | 43.16 | 1.12                  | 1        | 1.25     | 0     | 0.92                 | 0.71     | 1.2      | 0     |
|                       | Male      | 1.06                                                          | 0.98     | 1.14     | 0.63  | 1.01                  | 0.83     | 1.22     | 36.58 | 0.89                 | 0.67     | 1.16     | 0     |
|                       | Degree    | 1.03                                                          | 0.96     | 1.11     | 0     | 1                     | 0.9      | 1.12     | 0     | 1.2                  | 0.88     | 1.65     | 1.58  |
|                       | No degree | 1.06                                                          | 0.93     | 1.20     | 52.47 | 1.07                  | 0.97     | 1.17     | 0     | 0.81                 | 0.65     | 1.02     | 0     |
|                       | 16-29y    | 0.92                                                          | 0.75     | 1.12     | 0     | 1.24                  | 0.97     | 1.59     | 0     | 0.88                 | 0.5      | 1.57     | 0     |
|                       | 30-49y    | 0.98                                                          | 0.89     | 1.09     | 0     | 1.04                  | 0.88     | 1.24     | 0     | 0.9                  | 0.58     | 1.4      | 31.09 |
|                       | 50+y      | 1.06                                                          | 0.97     | 1.16     | 48.17 | 1.03                  | 0.89     | 1.2      | 37.38 | 0.94                 | 0.75     | 1.17     | 0     |
| No longer<br>employed | Overall   | 1.03                                                          | 0.89     | 1.20     | 34.15 | 1.02                  | 0.66     | 1.56     | 70.57 | 1.51                 | 0.92     | 2.5      | 43.69 |
|                       | Female    | 1.12                                                          | 0.92     | 1.36     | 29.92 | 1.04                  | 0.69     | 1.58     | 52.05 | 1.1                  | 0.35     | 3.45     | 74.79 |
|                       | Male      | 1.03                                                          | 0.90     | 1.19     | 0.75  | 1.05                  | 0.56     | 1.98     | 72.47 | 1.41                 | 0.98     | 2.03     | 0     |
|                       | Degree    | 1.08                                                          | 0.96     | 1.22     | 0     | 0.91                  | 0.69     | 1.19     | 20.25 | 1.76                 | 0.96     | 3.25     | 6.66  |
|                       | No degree | 1.05                                                          | 0.85     | 1.28     | 27.01 | 0.93                  | 0.62     | 1.41     | 61.88 | 1.28                 | 0.81     | 2.03     | 10.84 |
|                       | 16-29y    | 1.07                                                          | 0.62     | 1.85     | 56.05 | 1.45                  | 0.6      | 3.51     | 75.09 | 1.77                 | 0.36     | 8.61     | 86.17 |
|                       | 30-49y    | 0.98                                                          | 0.82     | 1.19     | 0     | 0.94                  | 0.57     | 1.53     | 0     | 1.67                 | 0.58     | 4.85     | 72.6  |
|                       | 50+y      | 1.04                                                          | 0.92     | 1.19     | 21.97 | 0.87                  | 0.54     | 1.39     | 67.75 | 1.4                  | 0.86     | 2.27     | 0     |
| Stable<br>unemployed  | Overall   | 1.24                                                          | 0.95     | 1.63     | 41.28 | 1.1                   | 0.93     | 1.29     | 0     | 1.36                 | 0.73     | 2.52     | 52.27 |
|                       | Female    | 1.00                                                          | 0.87     | 1.15     | 0     | 1.35                  | 1        | 1.82     | 47    | 0.91                 | 0.48     | 1.73     | 0     |
|                       | Male      | 1.32                                                          | 0.93     | 1.86     | 46.4  | 0.84                  | 0.67     | 1.04     | 0     | 1.72                 | 0.42     | 7.04     | 79.83 |
|                       | Degree    | 0.95                                                          | 0.70     | 1.28     | 29.76 | 0.65                  | 0.27     | 1.56     | 89.56 | 0.86                 | 0.52     | 1.42     | 0     |
|                       | No degree | 1.32                                                          | 0.93     | 1.87     | 44.03 | 1.17                  | 0.98     | 1.38     | 0     | 1.49                 | 0.57     | 3.9      | 70.57 |
|                       | 16-29y    | 1.17                                                          | 0.87     | 1.56     | 0     | 1.34                  | 0.78     | 2.3      | 0     | 1.25                 | 0.53     | 2.95     | *     |
|                       | 30-49y    | 0.95                                                          | 0.47     | 1.94     | 25.14 | 1.12                  | 0.79     | 1.6      | 0     | 0.88                 | 0.34     | 2.29     | 0     |
|                       | 50+y      | 1.23                                                          | 0.89     | 1.70     | 63.19 | 1.04                  | 0.89     | 1.22     | 0     | 1.48                 | 0.56     | 3.89     | 70.06 |

\* indicates only one study included

**Table 4. Analysis of change excluding studies with  $\leq 5$  cell counts**

|                    |           | Drinking more alcohol |          |          |       | Drinking less alcohol |          |          |       | Smoking more |                |          |       |
|--------------------|-----------|-----------------------|----------|----------|-------|-----------------------|----------|----------|-------|--------------|----------------|----------|-------|
|                    |           | RR                    | Lower CI | Upper CI | I2%   | RR                    | Lower CI | Upper CI | I2%   | RR           | Lower CI       | Upper CI | I2%   |
| Furloughed         | Overall   | 1.11                  | 0.98     | 1.26     | 71.15 | 0.97                  | 0.85     | 1.11     | 43.66 | 1.31         | 0.88           | 1.96     | 65.25 |
|                    | Female    | 1.02                  | 0.93     | 1.12     | 23.96 | 0.78                  | 0.46     | 1.31     | 79.99 | 1.46         | 1.14           | 1.87     | 0.00  |
|                    | Male      | 1.33                  | 1.08     | 1.64     | 73.84 | 0.97                  | 0.86     | 1.09     | 0     | 2.08         | 0.71           | 6.14     | 81.98 |
|                    | Degree    | 1.02                  | 0.90     | 1.17     | 40.63 | 1.18                  | 0.95     | 1.45     | 43.64 | 1.44         | 0.93           | 2.25     | 0.00  |
|                    | No degree | 1.18                  | 0.99     | 1.42     | 77.36 | 0.89                  | 0.77     | 1.03     | 31.74 | 1.48         | 0.91           | 2.40     | 72.41 |
|                    | 16-29y    | 0.98                  | 0.73     | 1.32     | 61.21 | 0.96                  | 0.82     | 1.13     | 10.62 | 1.56         | 0.82           | 2.99     | 31.39 |
|                    | 30-49y    | 1.05                  | 0.82     | 1.35     | 71.96 | 0.95                  | 0.83     | 1.10     | 0     | 0.71         | 0.42           | 1.21     | 0.00  |
|                    | 50+y      | 1.19                  | 1.09     | 1.30     | 27.54 | 1.05                  | 0.95     | 1.17     | 0     | 1.46         | 0.95           | 2.24     | 51.93 |
| No longer employed | Overall   | 0.99                  | 0.88     | 1.13     | 0     | 1.11                  | 0.95     | 1.28     | 0     | 0.84         | 0.35           | 2.01     | *     |
|                    | Female    | 1.00                  | 0.87     | 1.14     | 0     | 1.21                  | 0.73     | 2.02     | 74.16 |              | no information |          |       |
|                    | Male      | 1.05                  | 0.77     | 1.42     | 27.8  | 1.03                  | 0.79     | 1.33     | 0     |              | no information |          |       |
|                    | Degree    | 1.04                  | 0.89     | 1.22     | 0     | 1.28                  | 0.88     | 1.84     | 38.4  |              | no information |          |       |
|                    | No degree | 0.98                  | 0.83     | 1.16     | 0     | 1.13                  | 0.92     | 1.39     | 0     | 0.84         | 0.30           | 2.35     | *     |
|                    | 16-29y    | 0.99                  | 0.74     | 1.32     | 0     | 1.24                  | 1.01     | 1.53     | 0     |              | no information |          |       |
|                    | 30-49y    | 0.88                  | 0.63     | 1.21     | 0     | 0.86                  | 0.56     | 1.33     | 0     |              | no information |          |       |
|                    | 50+y      | 1.04                  | 0.92     | 1.17     | 0     | 0.99                  | 0.82     | 1.20     | 0     |              | no information |          |       |
| Stable unemployed  | Overall   | 0.73                  | 0.53     | 1.00     | 33.12 | 0.97                  | 0.75     | 1.25     | 15.96 | 2.49         | 0.88           | 7.07     | *     |
|                    | Female    | 0.64                  | 0.47     | 0.88     | 12.45 | 0.83                  | 0.40     | 1.72     | 58.75 |              | no information |          |       |
|                    | Male      | 0.89                  | 0.59     | 1.35     | 24.58 | 1.32                  | 0.82     | 2.13     | 55.54 |              | no information |          |       |
|                    | Degree    | 0.68                  | 0.33     | 1.39     | 52.65 | 1.28                  | 0.48     | 3.45     | 69.58 |              | no information |          |       |
|                    | No degree | 0.81                  | 0.57     | 1.15     | 26.19 | 0.88                  | 0.66     | 1.17     | 4.99  |              | no information |          |       |
|                    | 16-29y    | 0.63                  | 0.41     | 0.98     | 0     | 0.86                  | 0.62     | 1.19     | 0     |              | no information |          |       |
|                    | 30-49y    | 0.40                  | 0.19     | 0.81     | *     | 0.74                  | 0.39     | 1.41     | *     | 2.49         | 0.88           | 7.07     | *     |
|                    | 50+y      | 0.89                  | 0.74     | 1.07     | 0     | 1.01                  | 0.69     | 1.48     | 31.33 |              | no information |          |       |

\* indicates only one study included

|                    |           | Smoking less   |          |          |       | Vaping more    |          |          |       | Vaping less    |          |          |     |
|--------------------|-----------|----------------|----------|----------|-------|----------------|----------|----------|-------|----------------|----------|----------|-----|
|                    |           | RR             | Lower CI | Upper CI | I2%   | RR             | Lower CI | Upper CI | I2%   | RR             | Lower CI | Upper CI | I2% |
| Furloughed         | Overall   | 1.42           | 0.86     | 2.33     | 68.92 | 1.53           | 1.14     | 2.07     | 0.00  | 1.30           | 0.82     | 2.06     | *   |
|                    | Female    | 0.79           | 0.45     | 1.39     | *     | 1.64           | 0.93     | 2.90     | 42.27 | 1.58           | 0.85     | 2.95     | *   |
|                    | Male      | 1.42           | 0.76     | 2.66     | 56.85 | 1.72           | 0.88     | 3.36     | 38.79 | 1.03           | 0.53     | 2.01     | *   |
|                    | Degree    | 2.07           | 0.95     | 4.53     | 35.49 | 2.71           | 1.59     | 4.62     | 0.00  | no information |          |          |     |
|                    | No degree | 1.31           | 0.75     | 2.31     | 68.46 | 1.32           | 0.74     | 2.37     | 59.43 | 1.48           | 0.88     | 2.48     |     |
|                    | 16-29y    | 1.10           | 0.14     | 8.76     | 92.84 | 1.45           | 0.58     | 3.66     | 36.77 | 2.45           | 1.04     | 5.77     | *   |
|                    | 30-49y    | 1.79           | 0.70     | 4.58     | 78.27 | 1.67           | 0.48     | 5.85     | 75.83 | 1.05           | 0.54     | 2.03     | *   |
|                    | 50+y      | 0.96           | 0.65     | 1.41     | 0.00  | 1.44           | 0.91     | 2.27     | 0.00  | 0.73           | 0.29     | 1.89     | *   |
| No longer employed | Overall   | 3.23           | 1.30     | 8.04     | 71.26 | 2.45           | 1.16     | 5.15     | *     | 1.00           | 0.33     | 3.00     | *   |
|                    | Female    | 2.72           | 1.60     | 4.63     | *     | no information |          |          |       | no information |          |          |     |
|                    | Male      | no information |          |          |       | no information |          |          |       | no information |          |          |     |
|                    | Degree    | 8.90           | 1.83     | 43.25    | *     | no information |          |          |       | no information |          |          |     |
|                    | No degree | 2.13           | 1.07     | 4.23     | *     | 2.60           | 1.15     | 5.91     | *     | no information |          |          |     |
|                    | 16-29y    | 3.14           | 1.18     | 8.38     | 74.59 | no information |          |          |       | no information |          |          |     |
|                    | 30-49y    | no information |          |          |       | no information |          |          |       | no information |          |          |     |
|                    | 50+y      | no information |          |          |       | no information |          |          |       | no information |          |          |     |
| Stable unemployed  | Overall   | 1.65           | 0.94     | 2.89     | 0.00  | 1.44           | 0.48     | 4.31     | *     | no information |          |          |     |
|                    | Female    | no information |          |          |       | no information |          |          |       | no information |          |          |     |
|                    | Male      | 1.59           | 0.71     | 3.53     | *     | no information |          |          |       | no information |          |          |     |
|                    | Degree    | no information |          |          |       | no information |          |          |       | no information |          |          |     |
|                    | No degree | 1.70           | 0.93     | 3.09     | 0.00  | no information |          |          |       | no information |          |          |     |
|                    | 16-29y    | 2.45           | 0.66     | 9.08     | *     | no information |          |          |       | no information |          |          |     |
|                    | 30-49y    | no information |          |          |       | no information |          |          |       | no information |          |          |     |
|                    | 50+y      | 2.74           | 1.44     | 5.20     | *     | no information |          |          |       | no information |          |          |     |

\* indicates only one study included

**Table 5. Analysis of change excluding studies with  $\leq 2$  cell counts**

|                    |           | Drinking more alcohol |          |          |       | Drinking less alcohol |          |          |       | Smoking more   |          |          |       |
|--------------------|-----------|-----------------------|----------|----------|-------|-----------------------|----------|----------|-------|----------------|----------|----------|-------|
|                    |           | RR                    | Lower CI | Upper CI | I2%   | RR                    | Lower CI | Upper CI | I2%   | RR             | Lower CI | Upper CI | I2%   |
| Furloughed         | Overall   | 1.11                  | 0.98     | 1.26     | 71.15 | 0.97                  | 0.85     | 1.11     | 43.66 | 1.31           | 0.88     | 1.96     | 65.25 |
|                    | Female    | 1.02                  | 0.93     | 1.12     | 23.96 | 0.78                  | 0.46     | 1.31     | 79.99 | 1.46           | 1.14     | 1.87     | 0.00  |
|                    | Male      | 1.33                  | 1.08     | 1.64     | 73.84 | 0.97                  | 0.86     | 1.09     | 0     | 1.76           | 0.81     | 3.83     | 69.91 |
|                    | Degree    | 1.02                  | 0.90     | 1.17     | 40.63 | 1.14                  | 0.92     | 1.41     | 41.94 | 1.44           | 0.93     | 2.25     | 0.00  |
|                    | No degree | 1.18                  | 0.99     | 1.42     | 77.36 | 0.89                  | 0.77     | 1.03     | 31.74 | 1.48           | 0.91     | 2.40     | 72.41 |
|                    | 16-29y    | 0.98                  | 0.73     | 1.32     | 61.21 | 0.96                  | 0.82     | 1.13     | 10.62 | 1.56           | 0.82     | 2.99     | 31.39 |
|                    | 30-49y    | 1.05                  | 0.82     | 1.35     | 71.96 | 0.95                  | 0.83     | 1.10     | 0     | 0.74           | 0.46     | 1.21     | 0.00  |
|                    | 50+y      | 1.20                  | 1.09     | 1.32     | 32.89 | 1.05                  | 0.95     | 1.17     | 0     | 1.46           | 0.95     | 2.24     | 51.93 |
| No longer employed | Overall   | 0.99                  | 0.87     | 1.11     | 0     | 1.11                  | 0.95     | 1.28     | 0     | 1.72           | 0.67     | 4.45     | 47.68 |
|                    | Female    | 1.00                  | 0.87     | 1.14     | 0     | 1.21                  | 0.73     | 2.02     | 74.16 | 1.77           | 0.45     | 6.98     | 71.72 |
|                    | Male      | 1.01                  | 0.81     | 1.26     | 0.1   | 1.03                  | 0.82     | 1.31     | 0     | 0.81           | 0.22     | 3.06     | *     |
|                    | Degree    | 1.03                  | 0.88     | 1.20     | 0     | 1.15                  | 0.94     | 1.40     | 0     | no information |          |          |       |
|                    | No degree | 0.98                  | 0.83     | 1.16     | 0     | 1.13                  | 0.92     | 1.39     | 0     | 2.20           | 0.28     | 17.00    | 79.55 |
|                    | 16-29y    | 0.99                  | 0.74     | 1.32     | 0     | 1.24                  | 1.01     | 1.53     | 0     | 1.55           | 0.28     | 8.69     | 62.63 |
|                    | 30-49y    | 0.88                  | 0.63     | 1.21     | 0     | 0.93                  | 0.63     | 1.37     | 0     | 1.56           | 0.46     | 5.23     | *     |
|                    | 50+y      | 1.02                  | 0.89     | 1.16     | 0     | 0.99                  | 0.82     | 1.20     | 0     | 2.54           | 0.66     | 9.71     | *     |
| Stable unemployed  | Overall   | 0.68                  | 0.50     | 0.91     | 27.75 | 0.96                  | 0.75     | 1.22     | 10.79 | 1.20           | 0.50     | 2.91     | 46.60 |
|                    | Female    | 0.65                  | 0.48     | 0.88     | 11.05 | 0.86                  | 0.49     | 1.51     | 37.57 | 2.55           | 0.85     | 7.71     | 58.12 |
|                    | Male      | 0.91                  | 0.63     | 1.33     | 15.09 | 1.24                  | 0.84     | 1.81     | 34.45 | no information |          |          |       |
|                    | Degree    | 0.62                  | 0.36     | 1.05     | 34.23 | 1.80                  | 1.09     | 2.96     | 51.36 | no information |          |          |       |
|                    | No degree | 0.75                  | 0.54     | 1.05     | 22.16 | 0.82                  | 0.63     | 1.06     | 0     | 1.24           | 0.45     | 3.41     | 53.56 |
|                    | 16-29y    | 0.63                  | 0.41     | 0.98     | 0     | 0.86                  | 0.62     | 1.19     | 0     | 1.19           | 0.33     | 4.35     | *     |
|                    | 30-49y    | 0.38                  | 0.21     | 0.70     | 0     | 0.74                  | 0.39     | 1.41     | *     | 2.49           | 0.88     | 7.07     | *     |
|                    | 50+y      | 0.85                  | 0.66     | 1.09     | 0     | 1.01                  | 0.72     | 1.42     | 21.01 | 0.62           | 0.19     | 2.07     | *     |

\* indicates only one study included

|                    |           | Smoking less   |          |          |       | Vaping more    |          |          |       | Vaping less    |          |          |       |
|--------------------|-----------|----------------|----------|----------|-------|----------------|----------|----------|-------|----------------|----------|----------|-------|
|                    |           | RR             | Lower CI | Upper CI | I2%   | RR             | Lower CI | Upper CI | I2%   | RR             | Lower CI | Upper CI | I2%   |
| Furloughed         | Overall   | 1.43           | 0.91     | 2.25     | 63.08 | 1.53           | 1.14     | 2.07     | 0.00  | 1.42           | 0.94     | 2.14     | 0.00  |
|                    | Female    | 1.12           | 0.70     | 1.80     | 26.26 | 1.54           | 0.96     | 2.46     | 25.25 | 1.58           | 0.85     | 2.95     | *     |
|                    | Male      | 1.61           | 0.91     | 2.85     | 59.77 | 1.61           | 1.04     | 2.51     | 0.00  | 1.09           | 0.61     | 1.97     | 0.00  |
|                    | Degree    | 1.61           | 1.04     | 2.50     | 0.00  | 2.93           | 1.80     | 4.75     | 0.00  | 0.72           | 0.26     | 1.99     | *     |
|                    | No degree | 1.31           | 0.75     | 2.31     | 68.46 | 1.31           | 0.79     | 2.19     | 50.61 | 1.54           | 0.95     | 2.49     | 0.00  |
|                    | 16-29y    | 1.10           | 0.14     | 8.76     | 92.84 | 1.45           | 0.58     | 3.66     | 36.77 | 2.39           | 1.08     | 5.30     | 0.00  |
|                    | 30-49y    | 1.93           | 0.92     | 4.04     | 59.34 | 1.67           | 0.48     | 5.85     | 75.83 | 1.05           | 0.54     | 2.03     | *     |
|                    | 50+y      | 0.96           | 0.65     | 1.41     | 0.00  | 1.56           | 1.04     | 2.34     | 0.00  | 1.23           | 0.58     | 2.60     | 15.56 |
| No longer employed | Overall   | 2.79           | 1.44     | 5.39     | 49.98 | 3.21           | 1.51     | 6.80     | 23.12 | 1.14           | 0.42     | 3.09     | 0.00  |
|                    | Female    | 2.69           | 1.68     | 4.30     | 0.00  | 3.46           | 1.75     | 6.83     | 0.00  | 0.99           | 0.23     | 4.27     | *     |
|                    | Male      | 2.96           | 0.44     | 20.16    | 79.80 | 1.57           | 0.43     | 5.68     | *     | 1.32           | 0.28     | 6.22     | *     |
|                    | Degree    | 3.71           | 0.92     | 14.96    | 58.89 | 11.29          | 2.20     | 58.03    | *     | 2.21           | 0.47     | 10.37    | *     |
|                    | No degree | 2.57           | 1.55     | 4.26     | 0.00  | 2.60           | 1.15     | 5.91     | *     | 0.90           | 0.24     | 3.40     | *     |
|                    | 16-29y    | 3.14           | 1.18     | 8.38     | 74.59 | 4.98           | 1.97     | 12.57    | *     | 2.15           | 0.19     | 24.37    | *     |
|                    | 30-49y    | 1.57           | 0.73     | 3.35     | *     | 5.51           | 1.69     | 17.93    | *     | 2.59           | 0.58     | 11.60    | *     |
|                    | 50+y      | 1.21           | 0.52     | 2.81     | 0.00  | 4.16           | 1.68     | 10.30    | *     | no information |          |          |       |
| Stable unemployed  | Overall   | 1.74           | 1.06     | 2.86     | 0.00  | 1.97           | 0.93     | 4.17     | 20.23 | 1.64           | 0.54     | 5.00     | *     |
|                    | Female    | 3.10           | 1.17     | 8.19     | 52.49 | 1.30           | 0.36     | 4.77     | *     | no information |          |          |       |
|                    | Male      | 1.77           | 0.87     | 3.61     | 0.00  | no information |          |          |       | no information |          |          |       |
|                    | Degree    | no information |          |          |       | no information |          |          |       | no information |          |          |       |
|                    | No degree | 1.84           | 1.06     | 3.21     | 0.00  | 1.47           | 0.57     | 3.82     | 0.00  | 1.85           | 0.58     | 5.92     | *     |
|                    | 16-29y    | 2.45           | 0.66     | 9.08     | *     | 0.76           | 0.14     | 4.27     | *     | no information |          |          |       |
|                    | 30-49y    | 1.63           | 0.29     | 9.30     | *     | 1.86           | 0.53     | 6.58     | 0.00  | no information |          |          |       |
|                    | 50+y      | 2.69           | 1.50     | 4.80     | 0.00  | 1.98           | 0.44     | 8.89     | 69.74 | 1.80           | 0.51     | 6.38     | *     |

\* indicates only one study included



**Table 6. Analysis of change excluding studies with zero cell counts**

|                    |           | Drinking more alcohol |          |          |       | Drinking less alcohol |          |          |       | Smoking more |          |          |       |
|--------------------|-----------|-----------------------|----------|----------|-------|-----------------------|----------|----------|-------|--------------|----------|----------|-------|
|                    |           | RR                    | Lower CI | Upper CI | I2%   | RR                    | Lower CI | Upper CI | I2%   | RR           | Lower CI | Upper CI | I2%   |
| Furloughed         | Overall   | 1.11                  | 0.98     | 1.26     | 71.15 | 0.97                  | 0.85     | 1.11     | 43.66 | 1.31         | 0.88     | 1.96     | 65.25 |
|                    | Female    | 1.02                  | 0.93     | 1.12     | 23.96 | 0.78                  | 0.46     | 1.31     | 79.99 | 1.46         | 1.14     | 1.87     | 0.00  |
|                    | Male      | 1.33                  | 1.08     | 1.64     | 73.84 | 0.97                  | 0.86     | 1.09     | 0     | 1.16         | 0.40     | 3.38     | 84.27 |
|                    | Degree    | 1.02                  | 0.90     | 1.17     | 40.63 | 1.14                  | 0.92     | 1.41     | 41.94 | 1.15         | 0.74     | 1.79     | 6.66  |
|                    | No degree | 1.18                  | 0.99     | 1.42     | 77.36 | 0.89                  | 0.77     | 1.03     | 31.74 | 1.48         | 0.91     | 2.40     | 72.41 |
|                    | 16-29y    | 0.98                  | 0.73     | 1.32     | 61.21 | 0.96                  | 0.82     | 1.13     | 10.62 | 1.56         | 0.82     | 2.99     | 31.39 |
|                    | 30-49y    | 1.05                  | 0.82     | 1.35     | 71.96 | 0.95                  | 0.83     | 1.10     | 0     | 0.74         | 0.46     | 1.21     | 0.00  |
|                    | 50+y      | 1.19                  | 1.09     | 1.30     | 27.54 | 1.05                  | 0.95     | 1.17     | 0     | 1.46         | 0.95     | 2.24     | 51.93 |
| No longer employed | Overall   | 0.99                  | 0.87     | 1.11     | 0     | 1.08                  | 0.93     | 1.26     | 0     | 1.07         | 0.65     | 1.77     | 4.98  |
|                    | Female    | 1.00                  | 0.87     | 1.14     | 0     | 1.21                  | 0.73     | 2.02     | 74.16 | 1.27         | 0.60     | 2.68     | 31.61 |
|                    | Male      | 0.99                  | 0.79     | 1.23     | 0.7   | 0.99                  | 0.79     | 1.25     | 0     | 1.36         | 0.68     | 2.71     | 0.00  |
|                    | Degree    | 1.02                  | 0.87     | 1.19     | 0     | 1.15                  | 0.94     | 1.40     | 0     | 0.87         | 0.38     | 1.99     | 0.00  |
|                    | No degree | 0.98                  | 0.83     | 1.16     | 0     | 1.08                  | 0.88     | 1.32     | 0     | 1.12         | 0.45     | 2.77     | 59.50 |
|                    | 16-29y    | 0.99                  | 0.74     | 1.32     | 0     | 1.24                  | 1.01     | 1.53     | 0     | 1.55         | 0.28     | 8.69     | 62.63 |
|                    | 30-49y    | 0.88                  | 0.63     | 1.21     | 0     | 0.93                  | 0.63     | 1.37     | 0     | 1.05         | 0.42     | 2.59     | 0.00  |
|                    | 50+y      | 1.04                  | 0.92     | 1.17     | 0     | 0.96                  | 0.80     | 1.16     | 0     | 0.92         | 0.48     | 1.77     | 0.00  |
| Stable unemployed  | Overall   | 0.73                  | 0.55     | 0.96     | 24.7  | 0.93                  | 0.74     | 1.17     | 5.25  | 1.12         | 0.60     | 2.08     | 27.57 |
|                    | Female    | 0.70                  | 0.54     | 0.91     | 3.7   | 0.90                  | 0.57     | 1.42     | 26.06 | 2.35         | 1.17     | 4.70     | 20.85 |
|                    | Male      | 0.91                  | 0.67     | 1.24     | 0.00  | 1.20                  | 0.85     | 1.70     | 24.49 | 0.88         | 0.32     | 2.41     | 0.00  |
|                    | Degree    | 0.67                  | 0.43     | 1.04     | 21.73 | 1.59                  | 0.98     | 2.58     | 46.62 | 2.48         | 0.73     | 8.46     | 0.00  |
|                    | No degree | 0.78                  | 0.59     | 1.05     | 11.39 | 0.81                  | 0.63     | 1.05     | 0     | 1.17         | 0.60     | 2.28     | 31.00 |
|                    | 16-29y    | 0.63                  | 0.41     | 0.98     | 0     | 0.86                  | 0.62     | 1.19     | 0     | 1.02         | 0.36     | 2.93     | 0.00  |
|                    | 30-49y    | 0.84                  | 0.18     | 3.90     | 92.55 | 0.73                  | 0.40     | 1.33     | 0     | 2.49         | 0.88     | 7.07     | *     |
|                    | 50+y      | 0.88                  | 0.73     | 1.05     | 0     | 0.98                  | 0.70     | 1.37     | 16.72 | 0.83         | 0.40     | 1.72     | 0.00  |

|                    |           | Smoking less |          |          |       | Vaping more |          |          |       | Vaping less    |          |          |       |
|--------------------|-----------|--------------|----------|----------|-------|-------------|----------|----------|-------|----------------|----------|----------|-------|
|                    |           | RR           | Lower CI | Upper CI | I2%   | RR          | Lower CI | Upper CI | I2%   | RR             | Lower CI | Upper CI | I2%   |
| Furloughed         | Overall   | 1.43         | 0.91     | 2.25     | 63.08 | 1.53        | 1.14     | 2.07     | 0.00  | 1.41           | 0.94     | 2.11     | 0.00  |
|                    | Female    | 0.88         | 0.43     | 1.80     | 27.97 | 1.54        | 0.96     | 2.46     | 25.25 | 1.59           | 0.87     | 2.91     | 0.00  |
|                    | Male      | 1.53         | 0.90     | 2.61     | 53.22 | 1.63        | 1.06     | 2.50     | 0.00  | 1.13           | 0.64     | 1.98     | 0.00  |
|                    | Degree    | 1.83         | 1.14     | 2.95     | 16.40 | 2.70        | 1.73     | 4.22     | 0.00  | 2.58           | 0.40     | 16.60    | 72.11 |
|                    | No degree | 1.29         | 0.77     | 2.17     | 62.51 | 1.31        | 0.79     | 2.19     | 50.61 | 1.55           | 0.96     | 2.48     | 0.00  |
|                    | 16-29y    | 1.10         | 0.14     | 8.76     | 92.84 | 1.45        | 0.58     | 3.66     | 36.77 | 2.39           | 1.08     | 5.30     | 0.00  |
|                    | 30-49y    | 1.93         | 0.92     | 4.04     | 59.34 | 1.44        | 0.52     | 3.96     | 58.64 | 1.05           | 0.54     | 2.03     | *     |
|                    | 50+y      | 0.98         | 0.68     | 1.43     | 0.00  | 1.56        | 1.04     | 2.34     | 0.00  | 1.47           | 0.65     | 3.32     | 24.93 |
| No longer employed | Overall   | 2.51         | 1.48     | 4.25     | 28.06 | 2.61        | 1.29     | 5.27     | 21.85 | 1.60           | 0.66     | 3.87     | 1.66  |
|                    | Female    | 2.76         | 1.71     | 4.47     | 0.00  | 2.88        | 1.52     | 5.45     | 0.00  | 0.99           | 0.23     | 4.27     | *     |
|                    | Male      | 2.12         | 0.76     | 5.97     | 46.32 | 1.95        | 0.70     | 5.42     | 0.00  | 1.79           | 0.51     | 6.29     | 0.00  |
|                    | Degree    | 3.64         | 1.50     | 8.81     | 29.96 | 2.51        | 0.44     | 14.30    | 59.42 | 2.21           | 0.47     | 10.37    | *     |
|                    | No degree | 2.54         | 1.57     | 4.12     | 0.00  | 2.33        | 1.16     | 4.69     | 0.00  | 1.31           | 0.47     | 3.71     | 2.37  |
|                    | 16-29y    | 3.14         | 1.18     | 8.38     | 74.59 | 4.98        | 1.97     | 12.57    | *     | 1.13           | 0.24     | 5.29     | 0.00  |
|                    | 30-49y    | 1.63         | 0.82     | 3.25     | 0.00  | 1.99        | 0.18     | 21.77    | 70.24 | 3.33           | 0.95     | 11.69    | 0.00  |
|                    | 50+y      | 1.27         | 0.58     | 2.77     | 0.00  | 2.31        | 0.56     | 9.51     | 60.40 | 1.39           | 0.16     | 12.08    | 50.66 |
| Stable unemployed  | Overall   | 1.74         | 1.06     | 2.86     | 0.00  | 1.97        | 0.93     | 4.17     | 20.23 | 1.41           | 0.24     | 8.26     | 70.08 |
|                    | Female    | 1.76         | 0.73     | 4.23     | 0.00  | 2.02        | 0.91     | 4.47     | 0.00  | 2.77           | 0.51     | 14.89    | *     |
|                    | Male      | 1.72         | 0.87     | 3.40     | 0.00  | 2.06        | 0.70     | 6.09     | 0.00  | 1.15           | 0.25     | 5.38     | *     |
|                    | Degree    | 1.46         | 0.37     | 5.76     | 36.01 | 0.82        | 0.06     | 10.87    | 68.81 | no information |          |          |       |
|                    | No degree | 1.77         | 1.03     | 3.04     | 0.00  | 2.07        | 1.00     | 4.28     | 0.00  | 1.86           | 0.20     | 17.47    | 74.48 |
|                    | 16-29y    | 1.20         | 0.21     | 6.77     | 51.82 | 0.76        | 0.14     | 4.27     | *     | 0.84           | 0.02     | 28.67    | 75.19 |
|                    | 30-49y    | 1.31         | 0.43     | 4.04     | 0.00  | 1.86        | 0.53     | 6.58     | 0.00  | 5.30           | 1.15     | 24.41    | *     |
|                    | 50+y      | 2.69         | 1.50     | 4.80     | 0.00  | 1.98        | 0.44     | 8.89     | 69.74 | 1.80           | 0.51     | 6.38     | *     |

\* indicates only one study included

# Figure set 1. Currently drinks 4+ days/week or 5+ drinks/occasion

Currently drinks 4+days/week or 5+ drinks/occasion)  
Furloughed vs. Stable employed

unadjusted

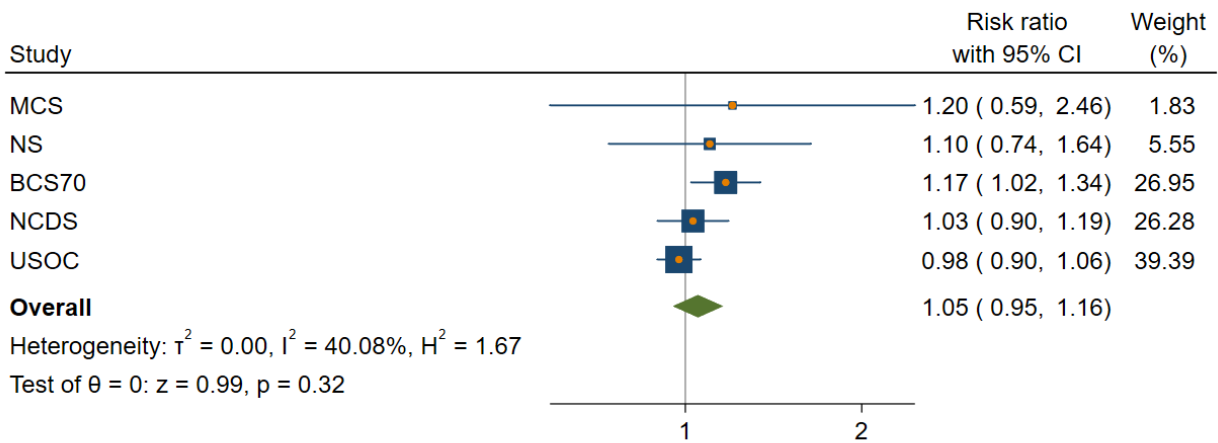

Random-effects REML model

Currently drinks 4+days/week or 5+ drinks/occasion)  
Furloughed vs. Stable employed

basic adjustment

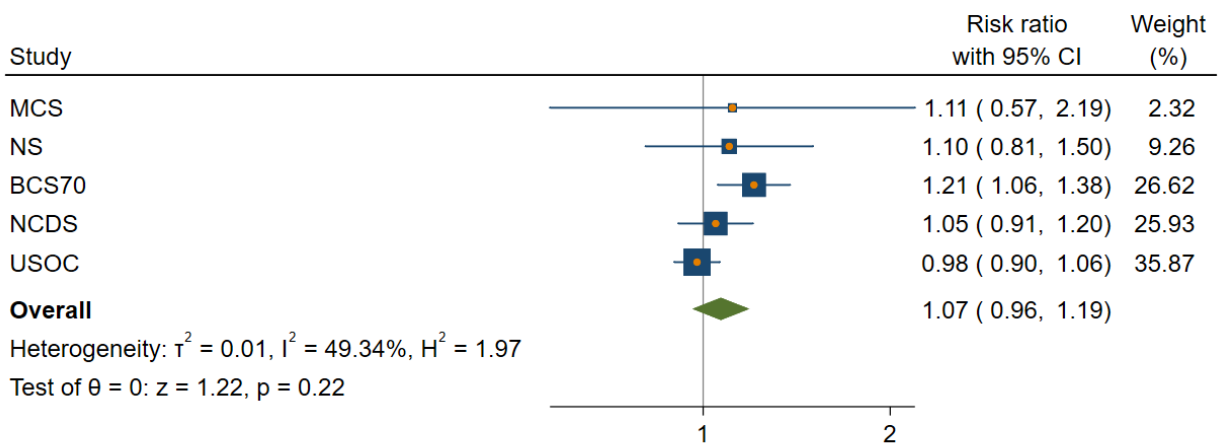

Random-effects REML model

Currently drinks 4+days/week or 5+ drinks/occasion)  
Furloughed vs. Stable employed

full adjustment

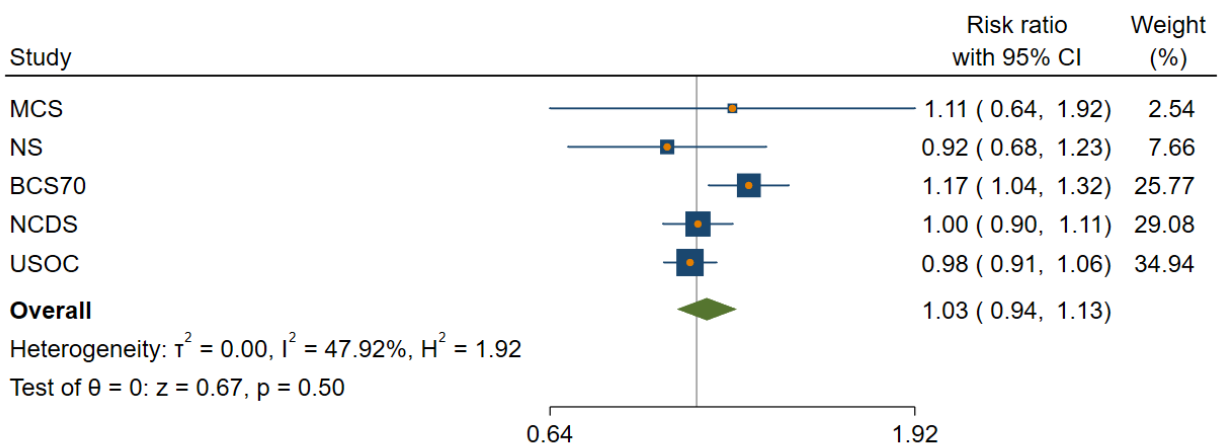

Random-effects REML model

Currently drinks 4+days/week or 5+ drinks/occasion)  
No longer employed vs. Stable employed

unadjusted

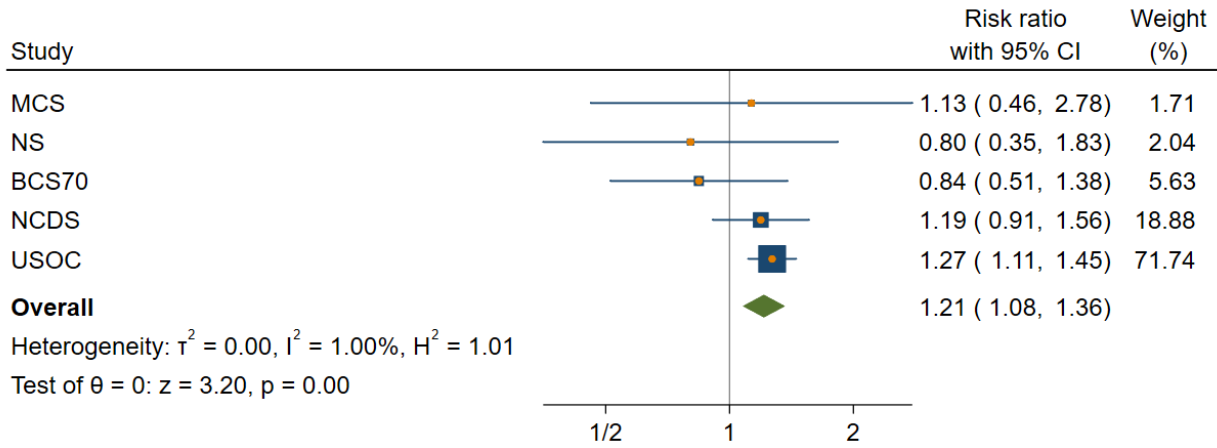

Random-effects REML model

Currently drinks 4+days/week or 5+ drinks/occasion)  
No longer employed vs. Stable employed

basic adjustment

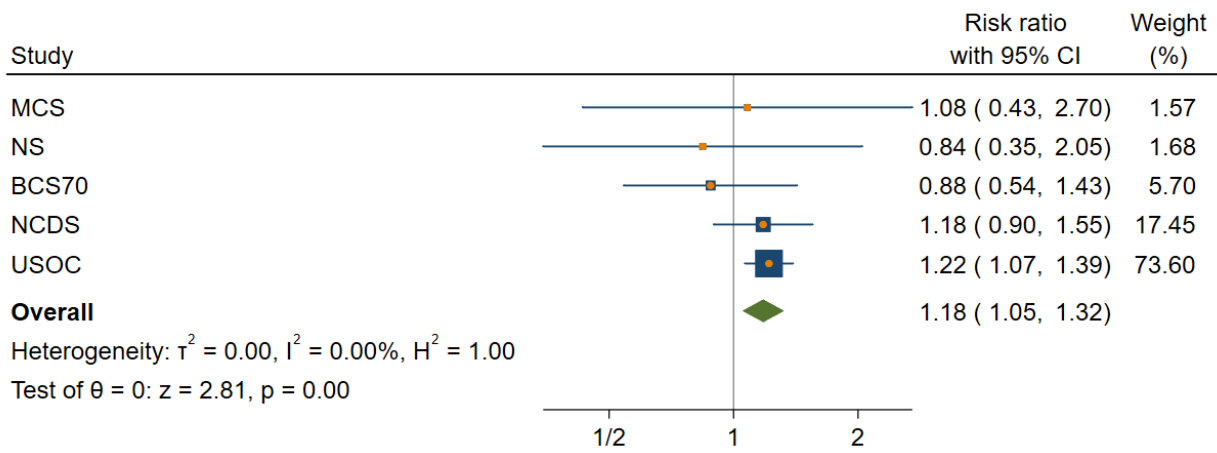

Random-effects REML model

Currently drinks 4+days/week or 5+ drinks/occasion)  
No longer employed vs. Stable employed

full adjustment

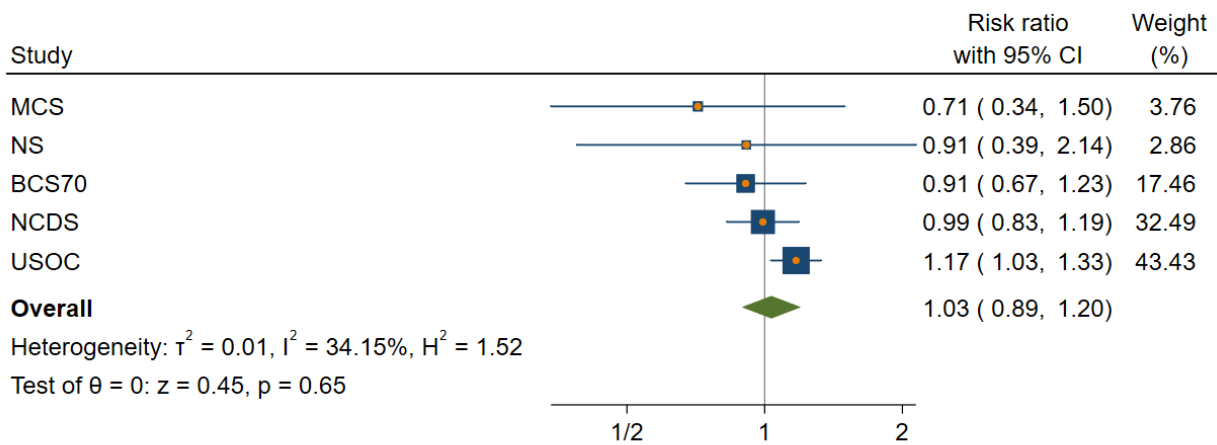

Random-effects REML model

Currently drinks 4+days/week or 5+ drinks/occasion)  
Stable unemployed vs. Stable employed

unadjusted

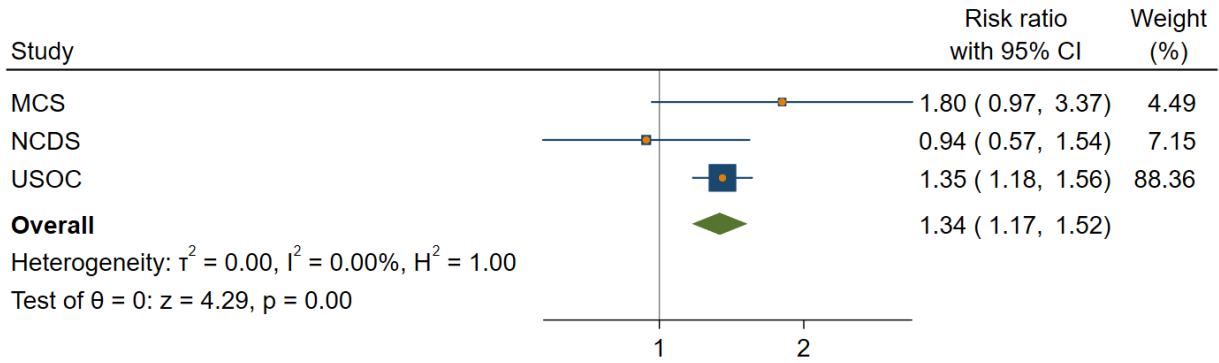

Random-effects REML model

Currently drinks 4+days/week or 5+ drinks/occasion)  
Stable unemployed vs. Stable employed

basic adjustment

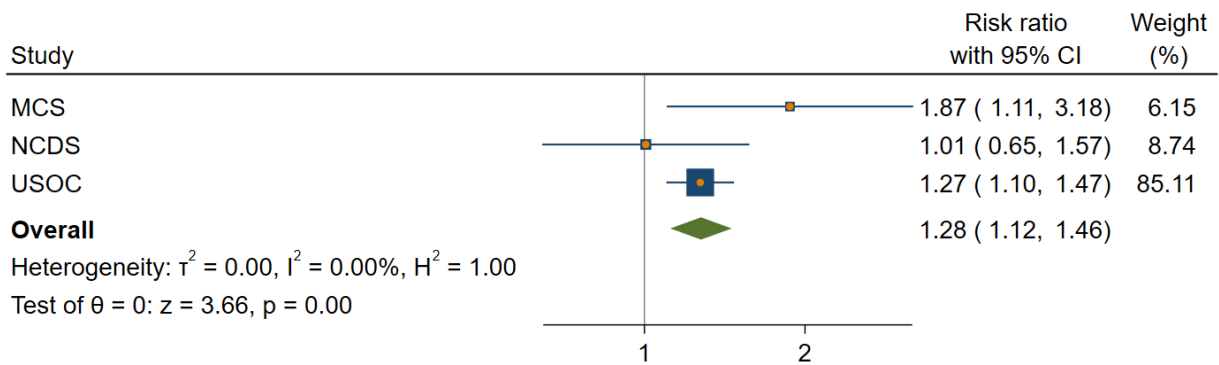

Random-effects REML model

Currently drinks 4+days/week or 5+ drinks/occasion)  
Stable unemployed vs. Stable employed

full adjustment

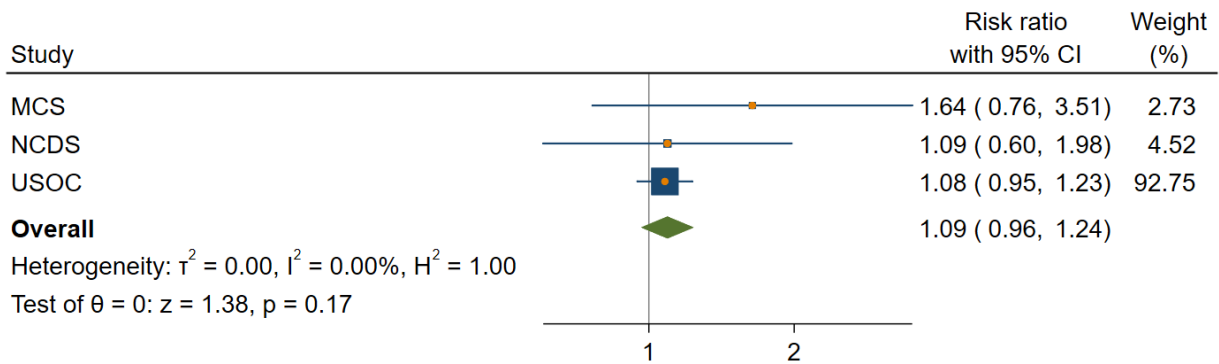

Random-effects REML model

## Figure set 2. Increased alcohol consumption

Increased alcohol consumption  
Furloughed vs. Stable employed

unadjusted

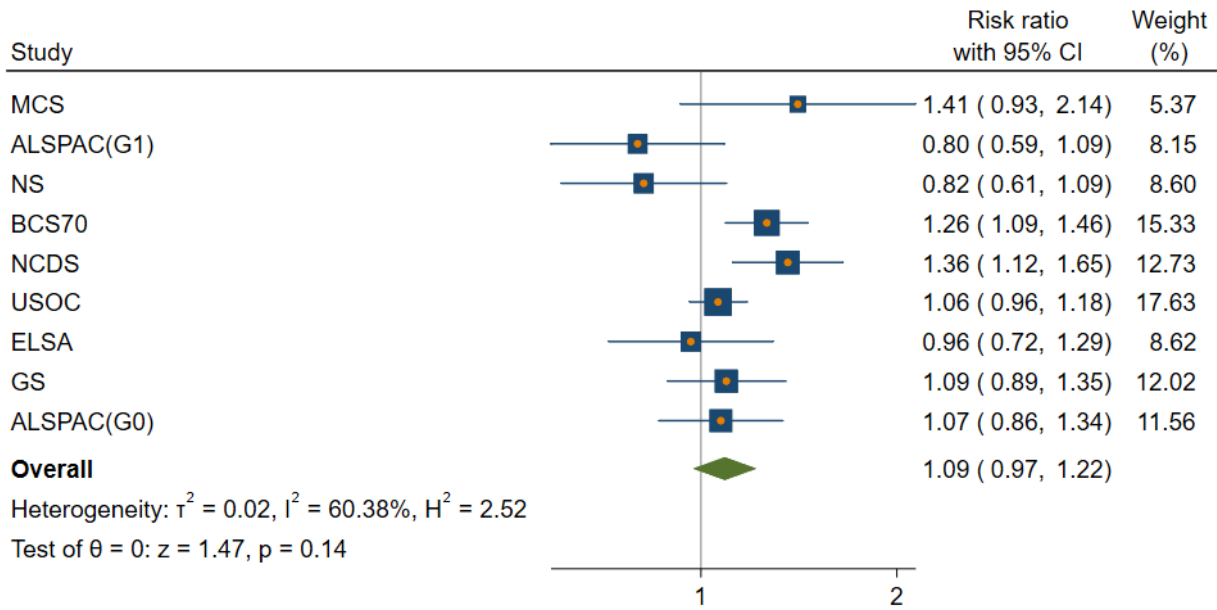

Random-effects REML model

Increased alcohol consumption  
Furloughed vs. Stable employed

basic adjustment

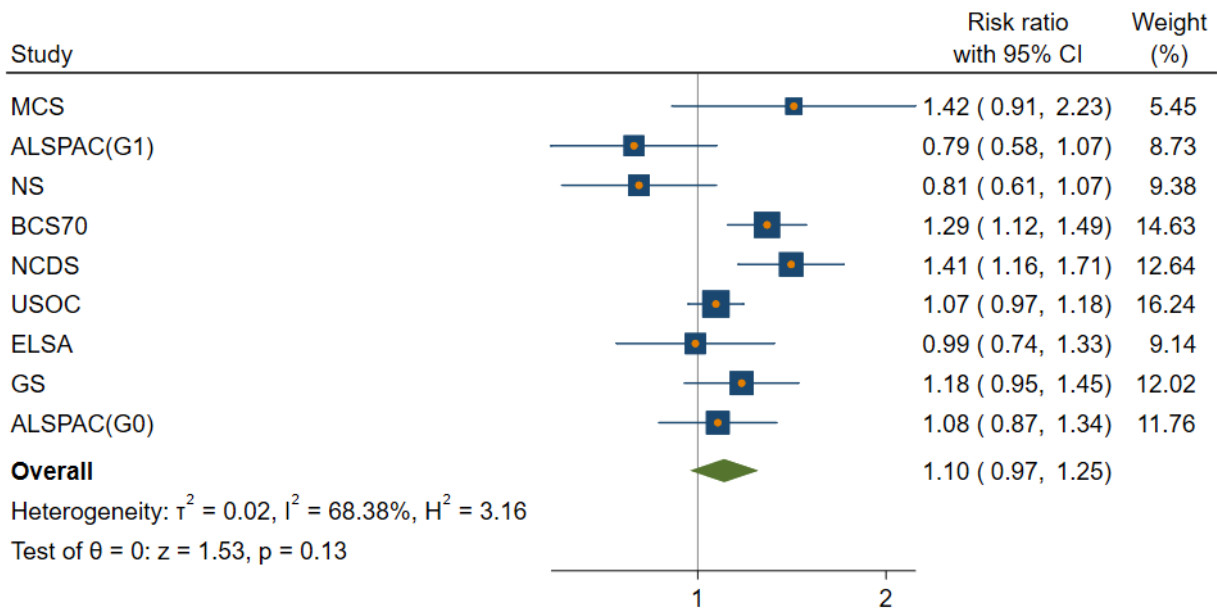

Random-effects REML model

Increased alcohol consumption  
Furloughed vs. Stable employed

full adjustment

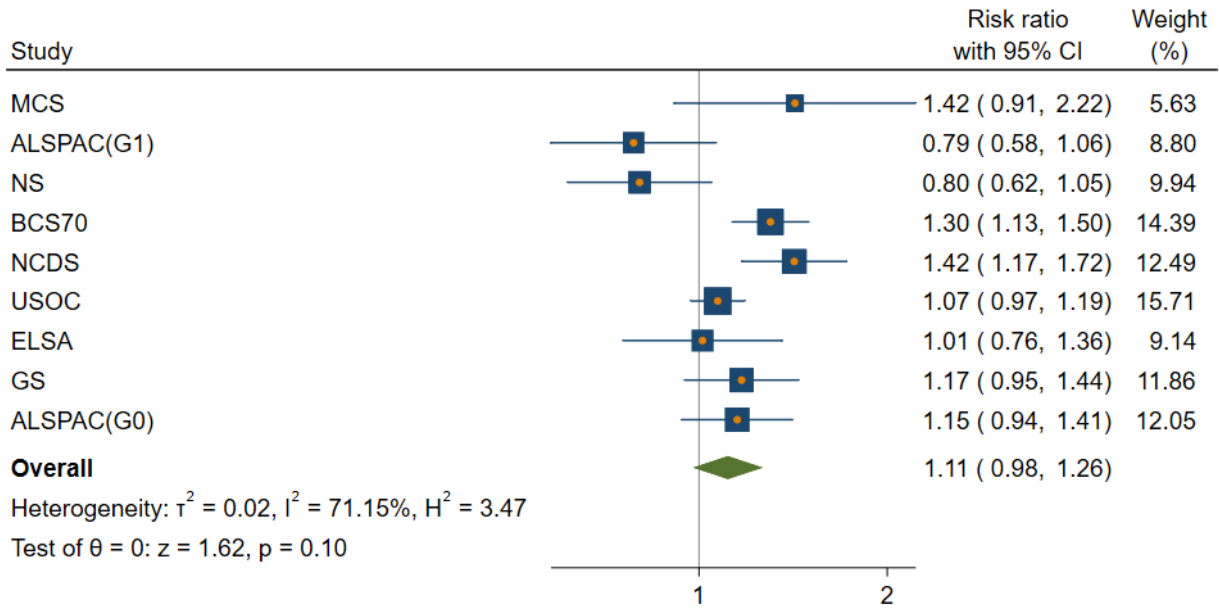

Random-effects REML model

Increased alcohol consumption  
No longer employed vs. Stable employed

unadjusted

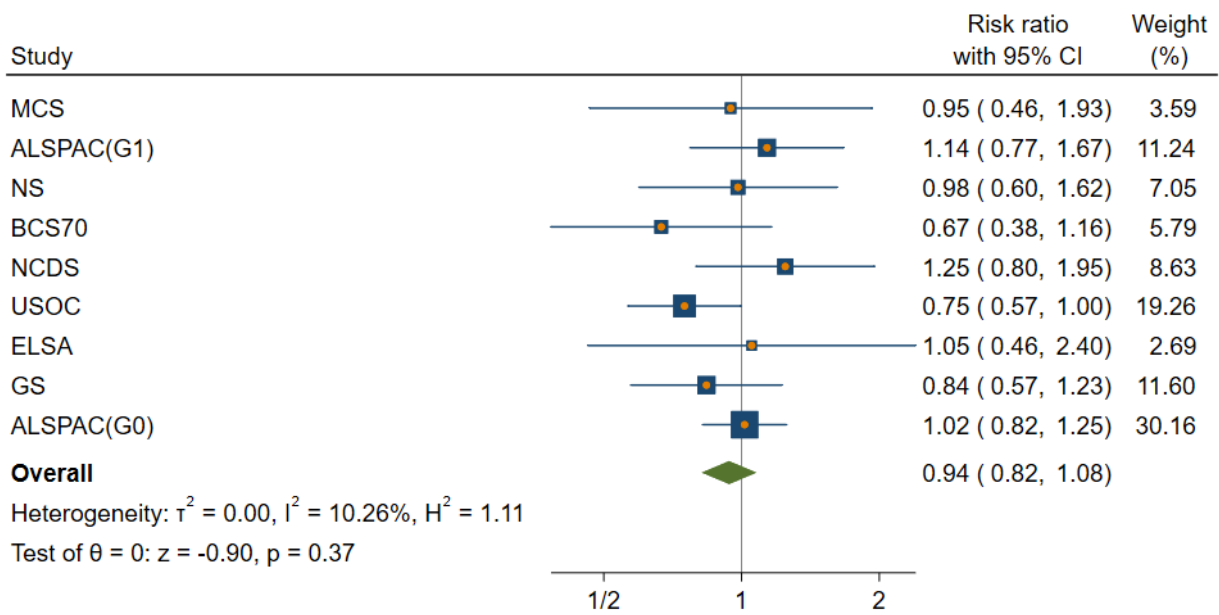

Random-effects REML model

Increased alcohol consumption  
No longer employed vs. Stable employed

basic adjustment

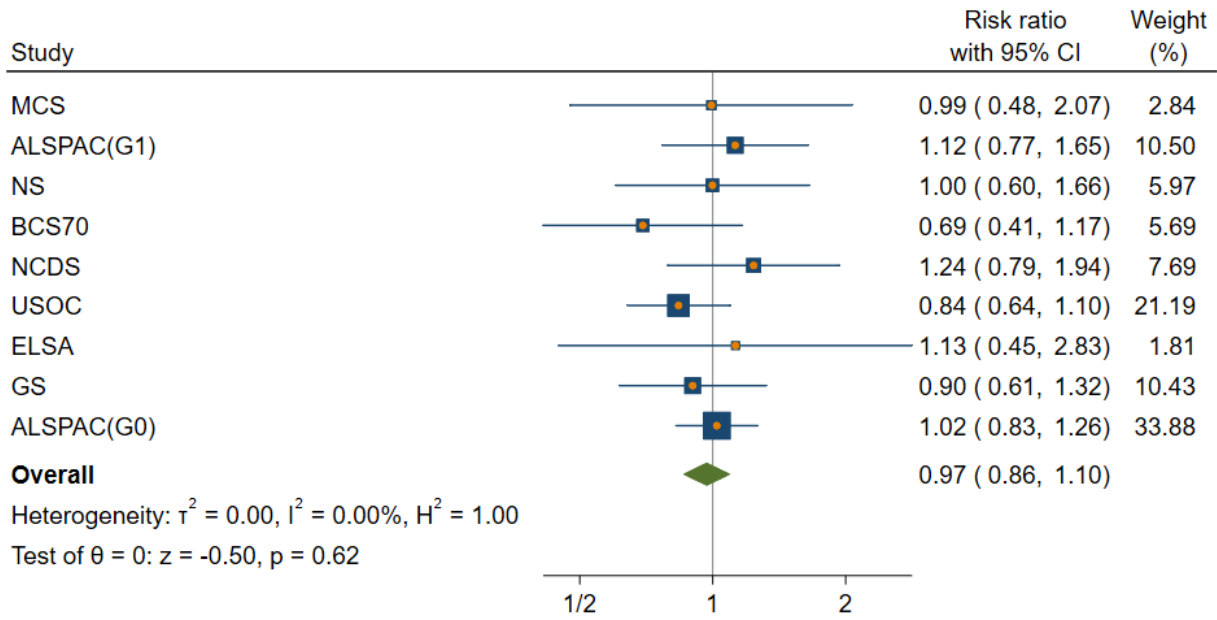

Random-effects REML model

Increased alcohol consumption  
No longer employed vs. Stable employed

full adjustment

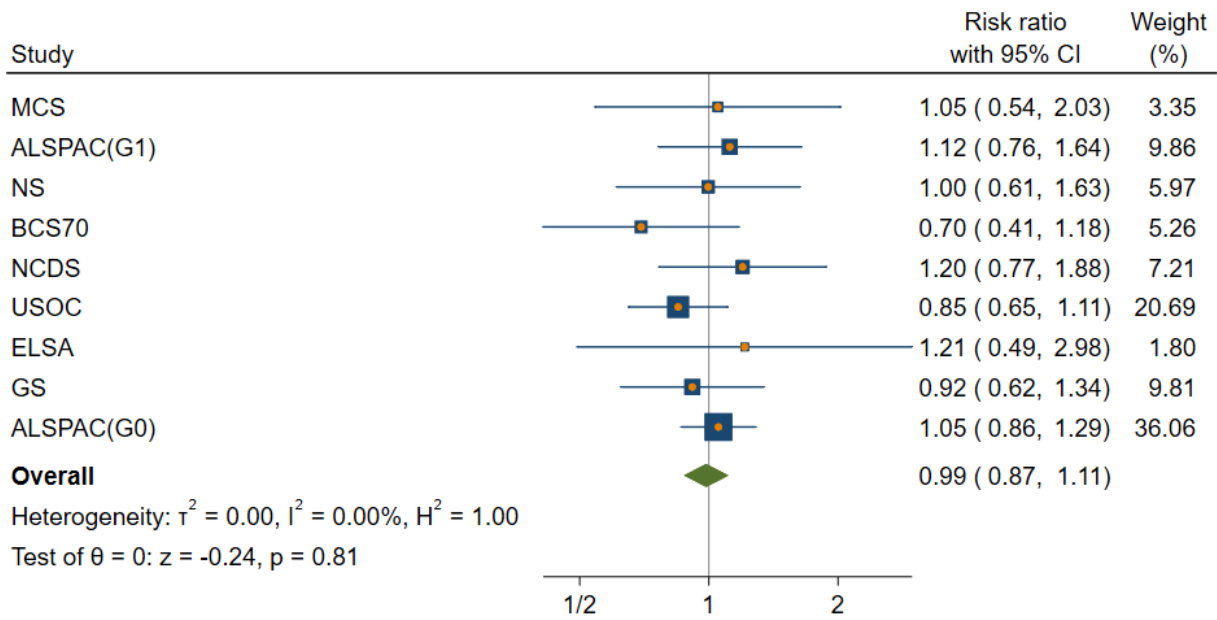

Random-effects REML model



Increased alcohol consumption  
Stable unemployed vs. Stable employed

unadjusted

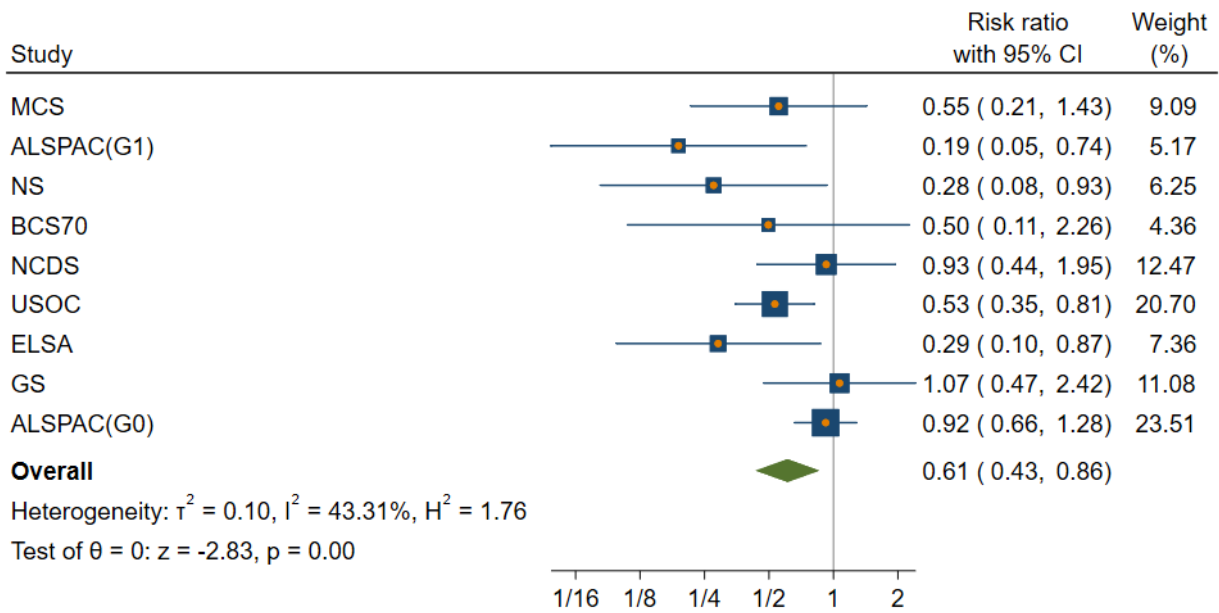

Random-effects REML model

Increased alcohol consumption  
Stable unemployed vs. Stable employed

basic adjustment

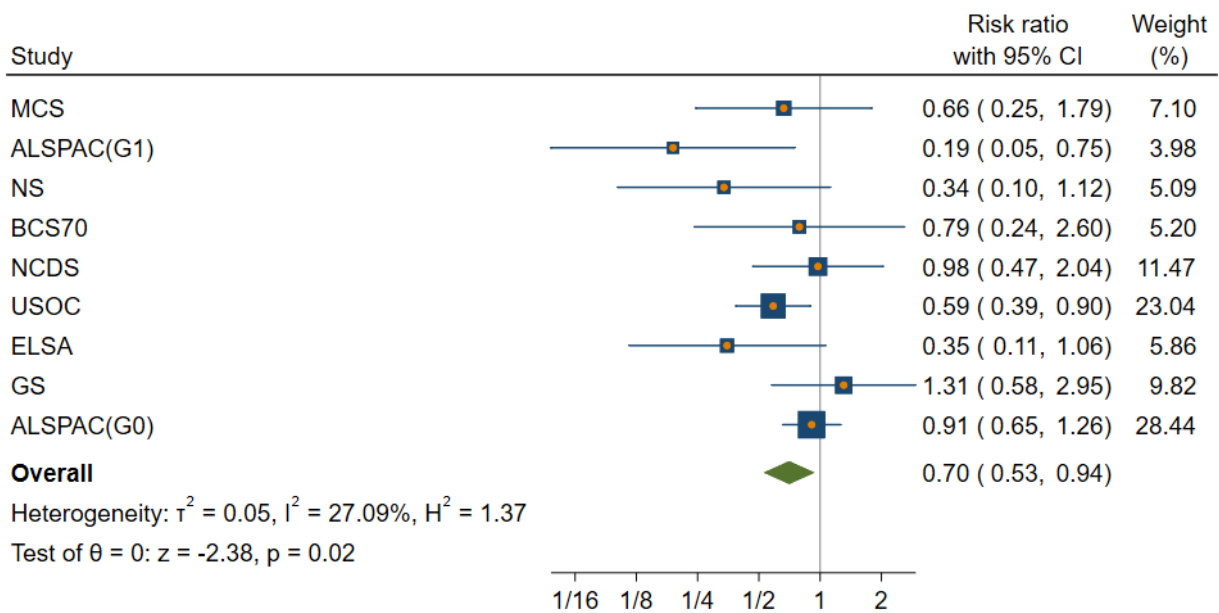

Random-effects REML model

Increased alcohol consumption  
Stable unemployed vs. Stable employed

full adjustment

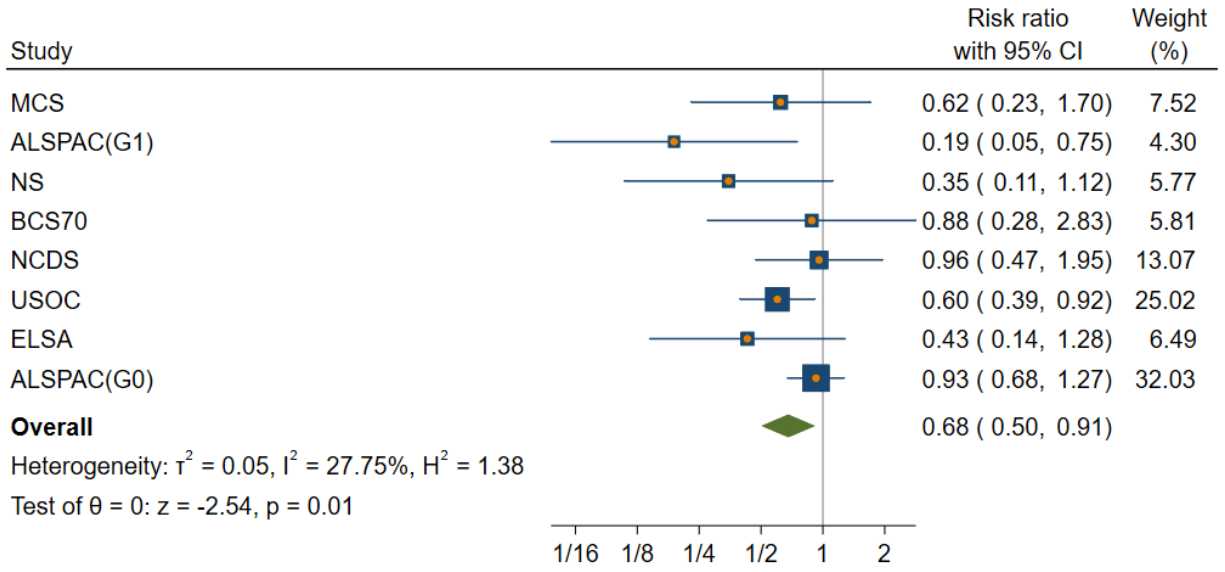

Random-effects REML model

### Figure set 3. Reduced alcohol consumption

Reduced alcohol consumption  
Furloughed vs. Stable employed

unadjusted

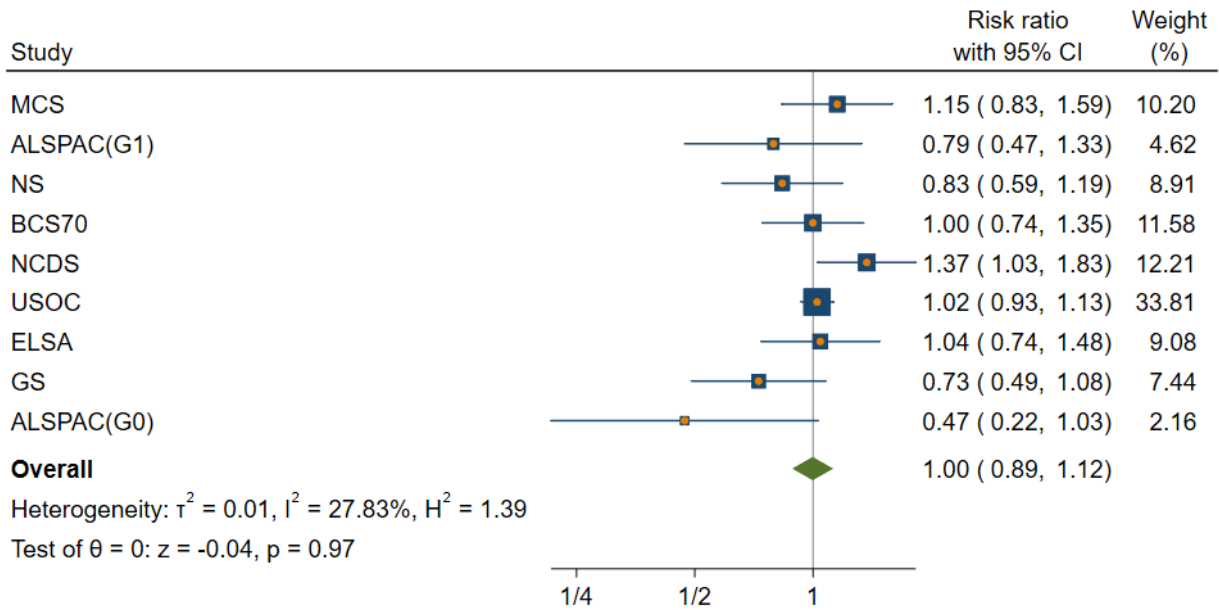

Random-effects REML model

Reduced alcohol consumption  
Furloughed vs. Stable employed

basic adjustment

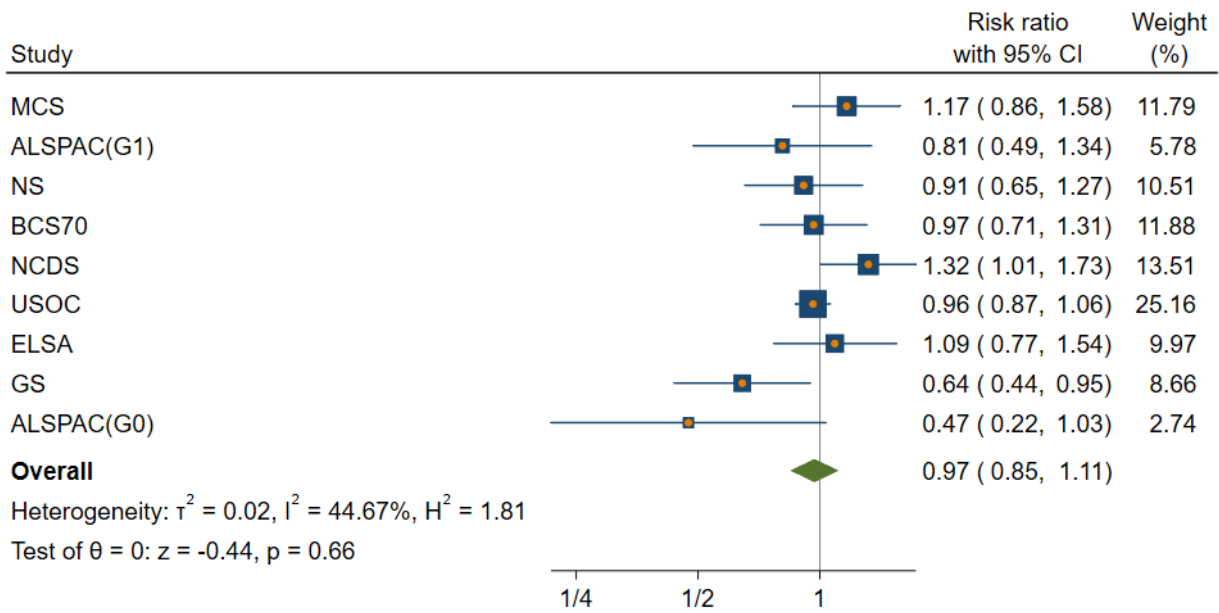

Random-effects REML model

Reduced alcohol consumption  
Furloughed vs. Stable employed

full adjustment

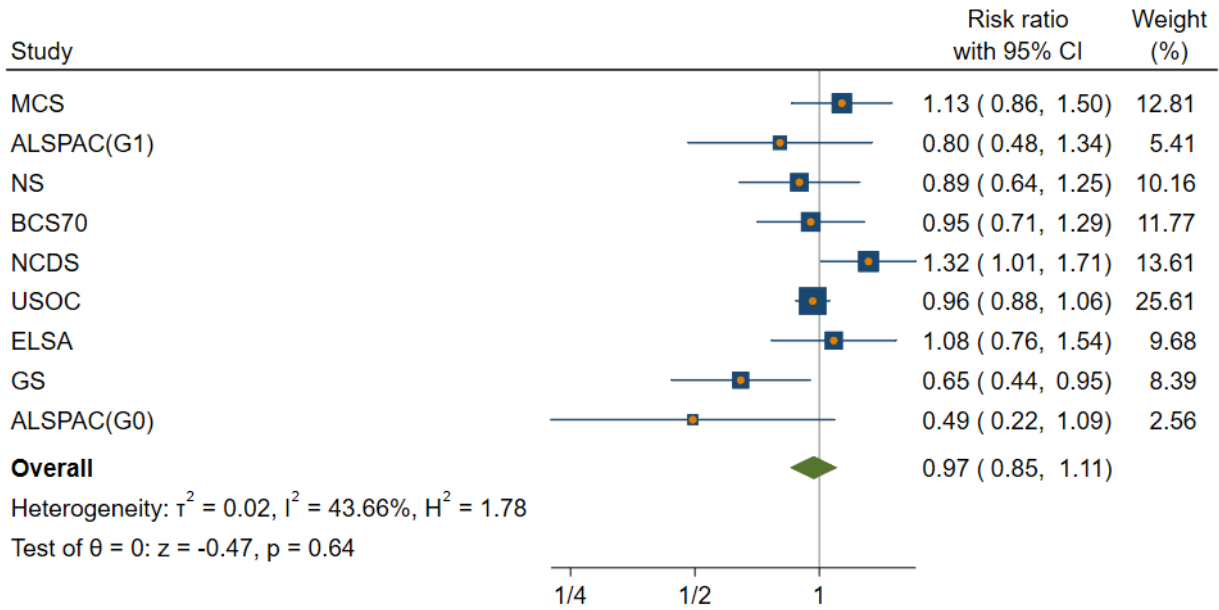

Random-effects REML model

Reduced alcohol consumption  
No longer employed vs. Stable employed

unadjusted

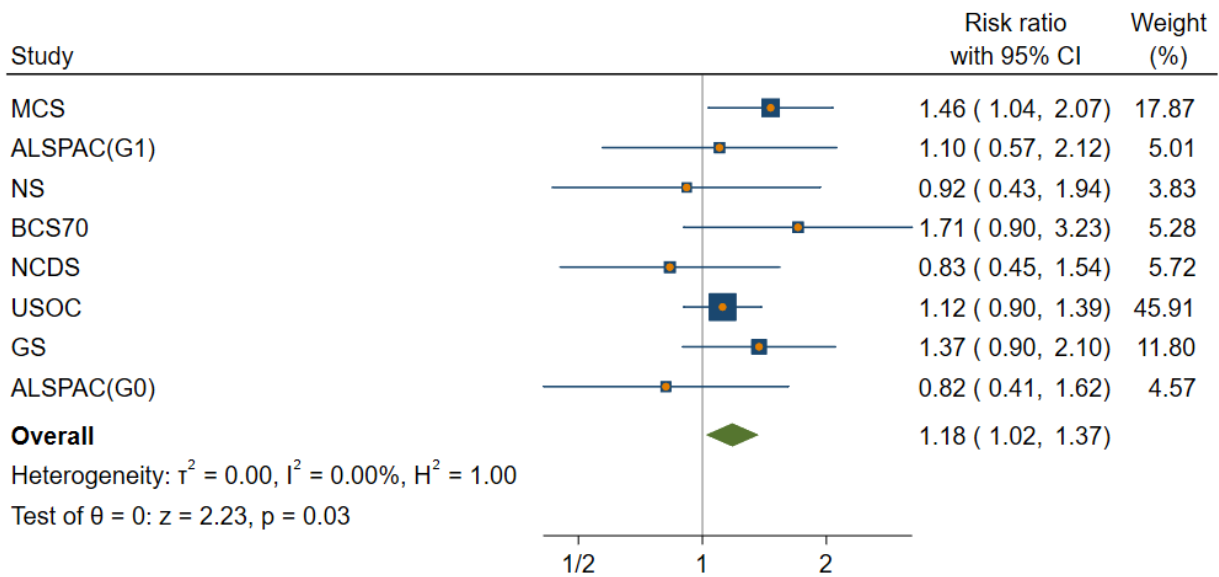

Random-effects REML model

Reduced alcohol consumption  
No longer employed vs. Stable employed

basic adjustment

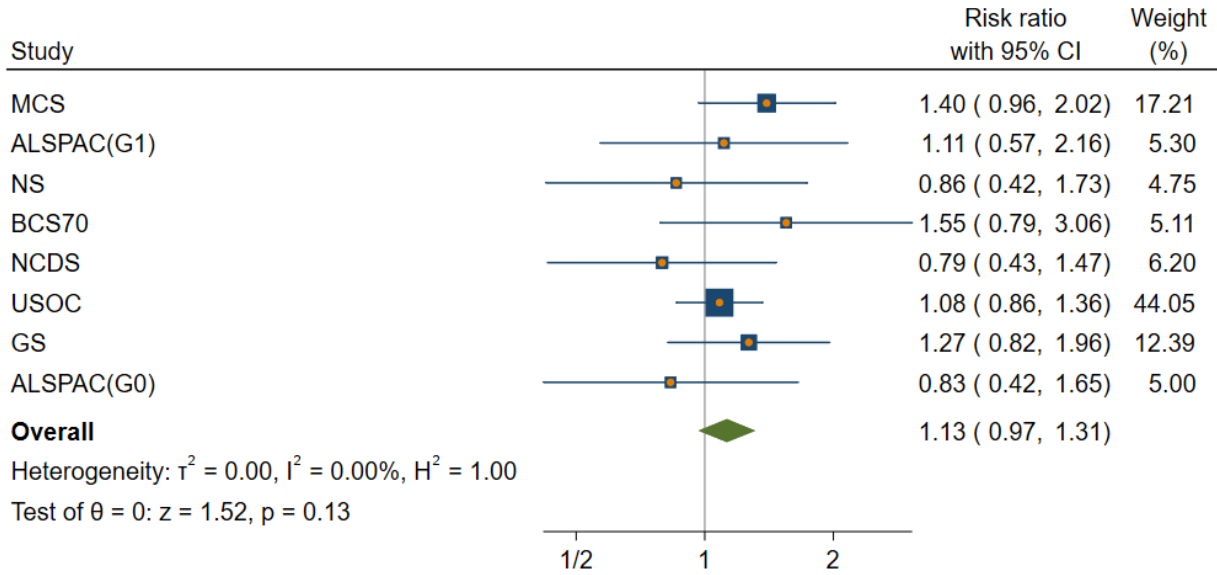

Random-effects REML model

Reduced alcohol consumption  
No longer employed vs. Stable employed

full adjustment

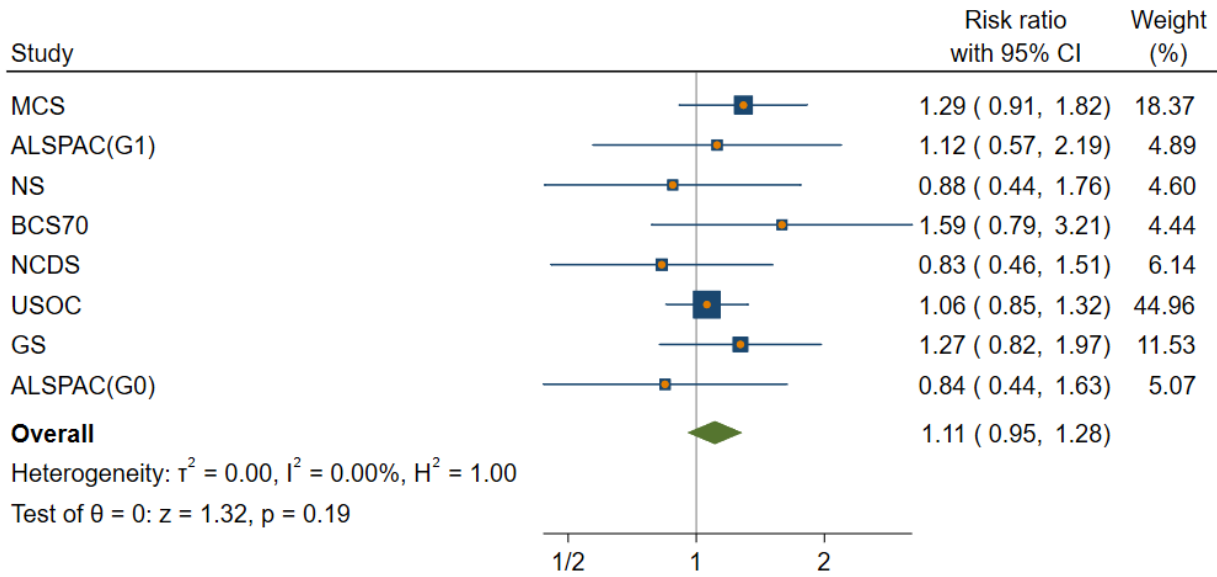

Random-effects REML model

Reduced alcohol consumption  
Stable unemployed vs. Stable employed

unadjusted

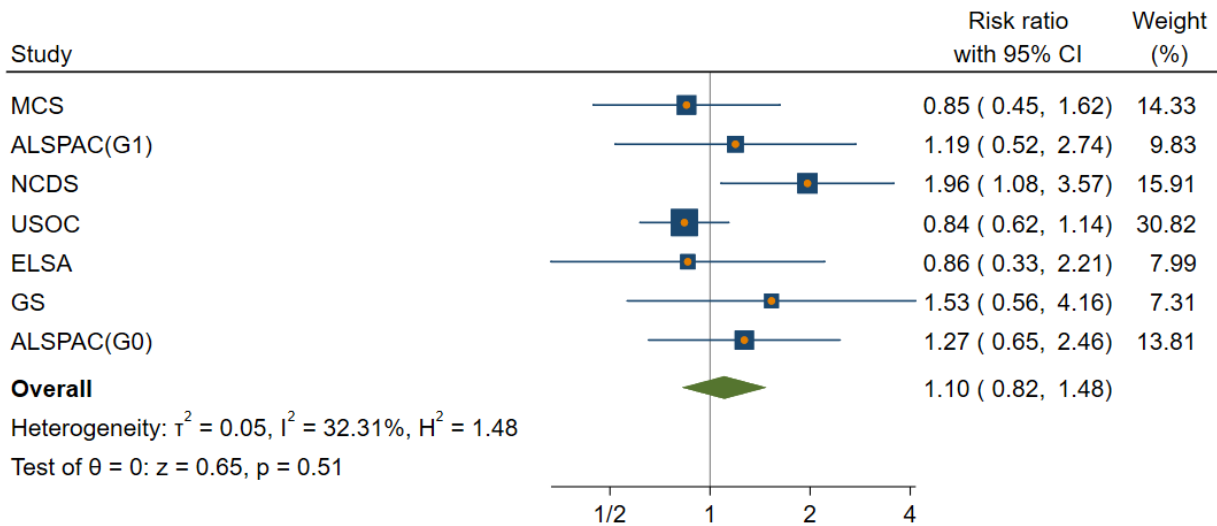

Random-effects REML model

Reduced alcohol consumption  
Stable unemployed vs. Stable employed

basic adjustment

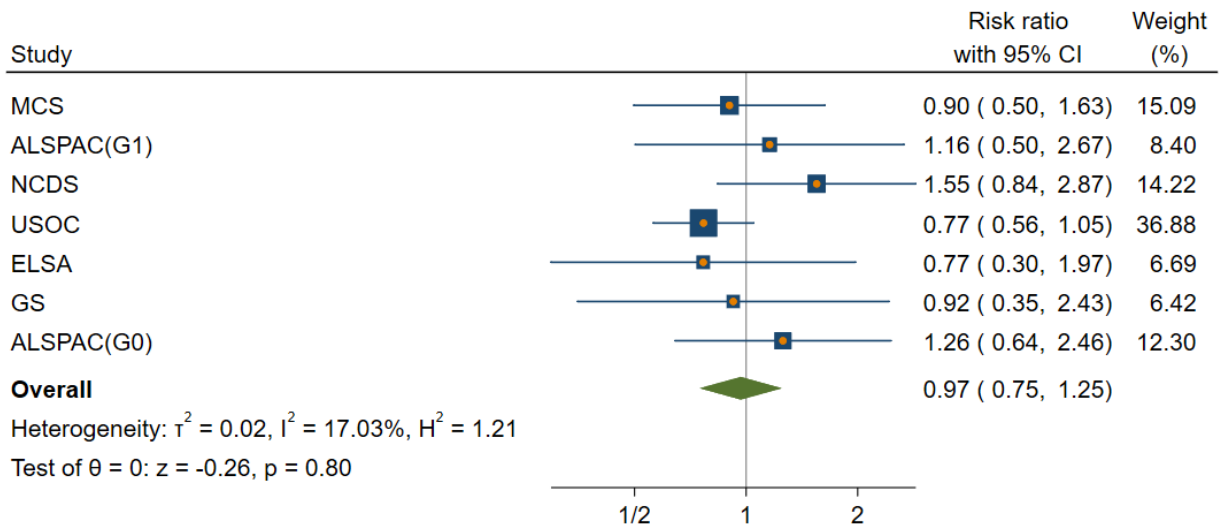

Random-effects REML model

Reduced alcohol consumption  
Stable unemployed vs. Stable employed

full adjustment

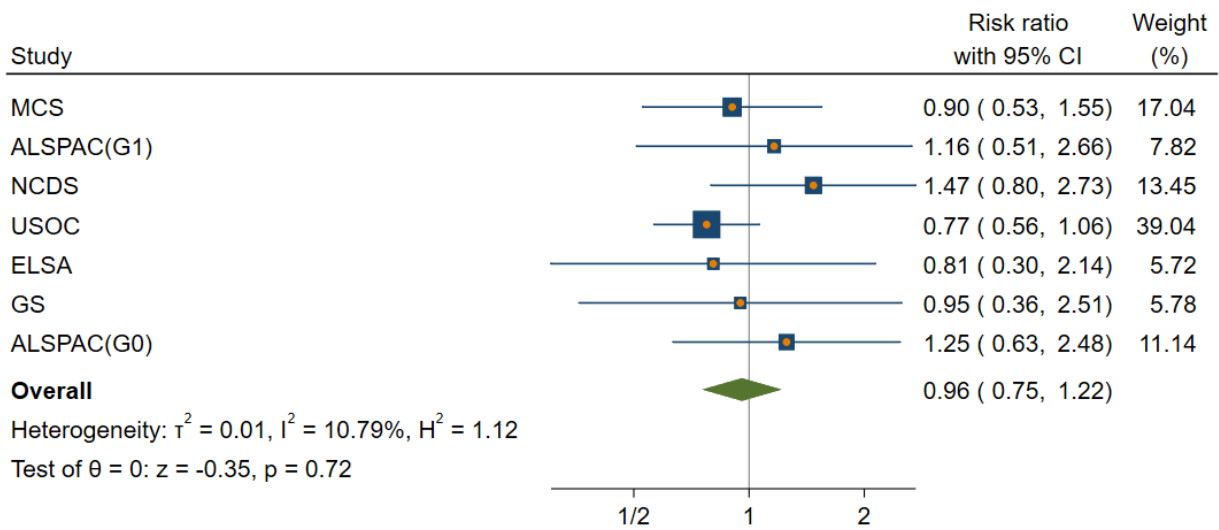

Random-effects REML model



## Figure set 4. Currently drinks 5+ drinks/occasion

Currently drinks 5+ drinks/occasion  
Furloughed vs. Stable employed

unadjusted

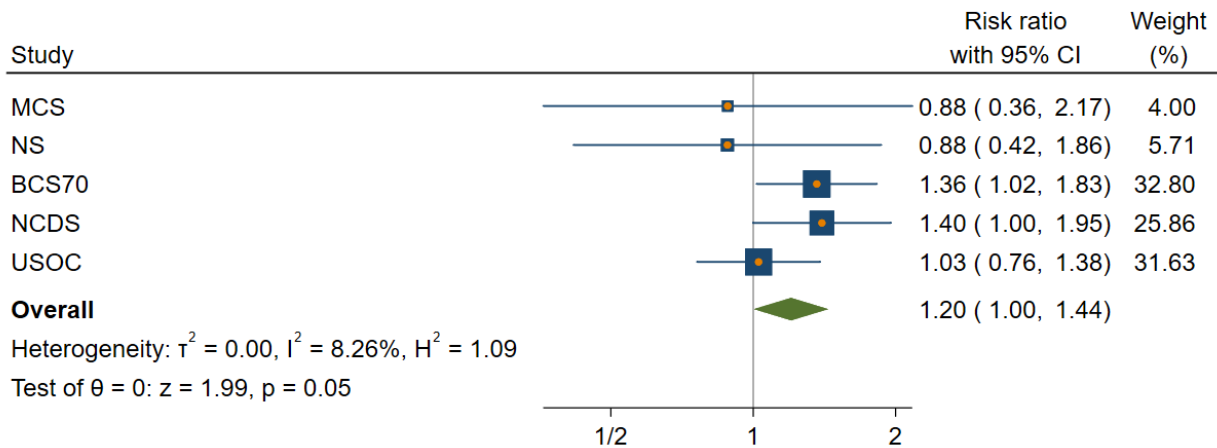

Random-effects REML model

Currently drinks 5+ drinks/occasion  
Furloughed vs. Stable employed

basic adjustment

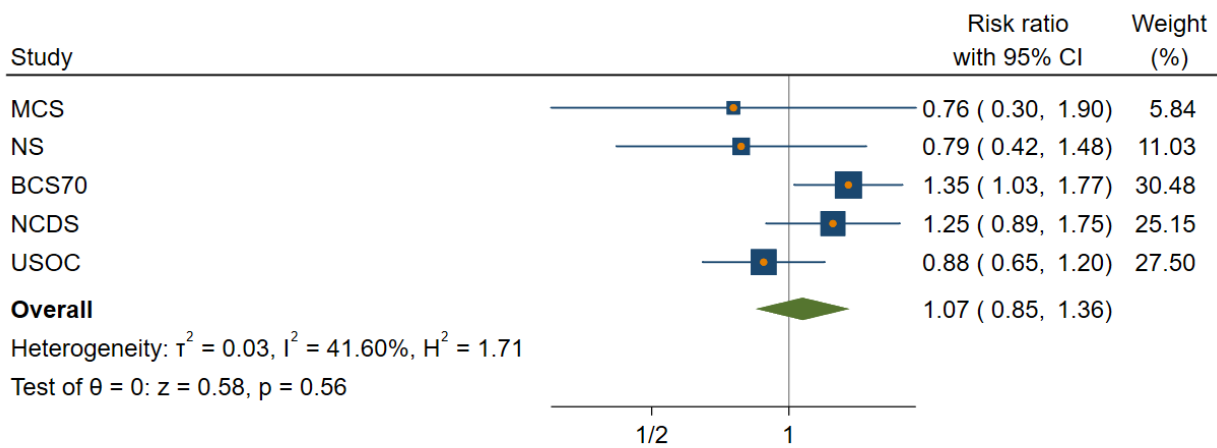

Random-effects REML model

Currently drinks 5+ drinks/occasion  
Furloughed vs. Stable employed

full adjustment

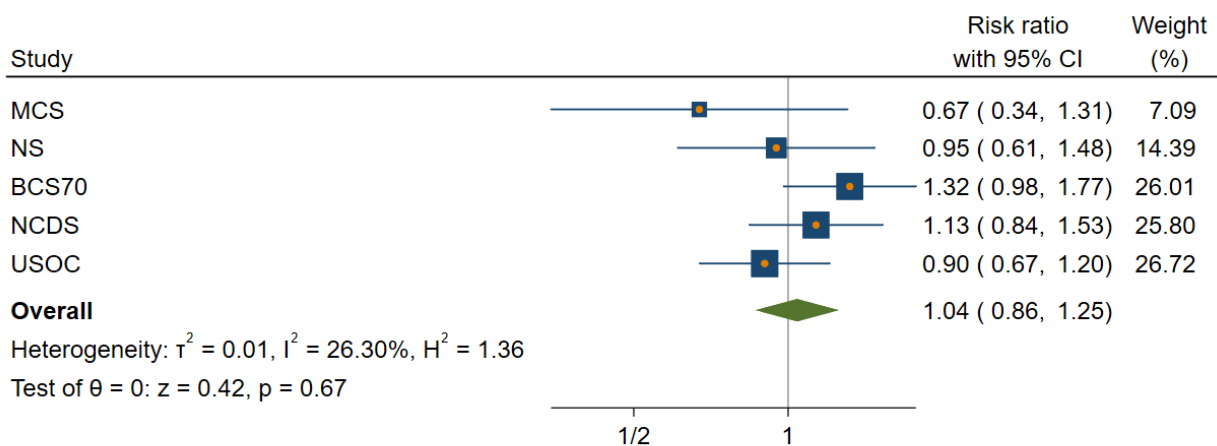

Random-effects REML model



Currently drinks 5+ drinks/occasion  
No longer employed vs. Stable employed

unadjusted

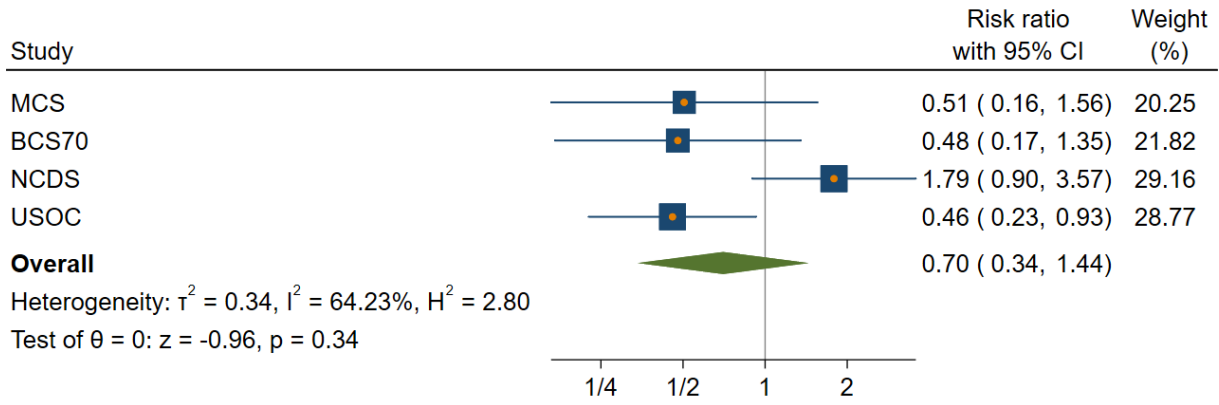

Random-effects REML model

Currently drinks 5+ drinks/occasion  
No longer employed vs. Stable employed

basic adjustment

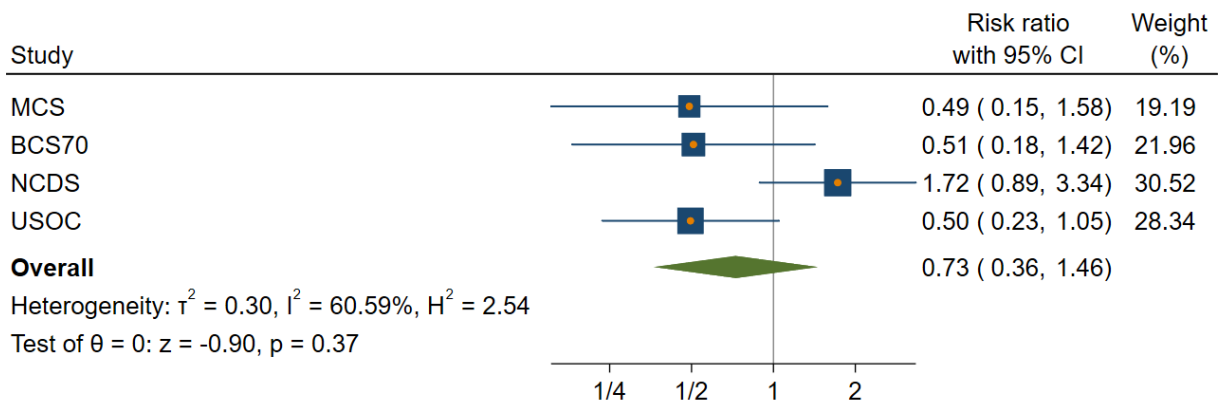

Random-effects REML model

Currently drinks 5+ drinks/occasion  
No longer employed vs. Stable employed

full adjustment

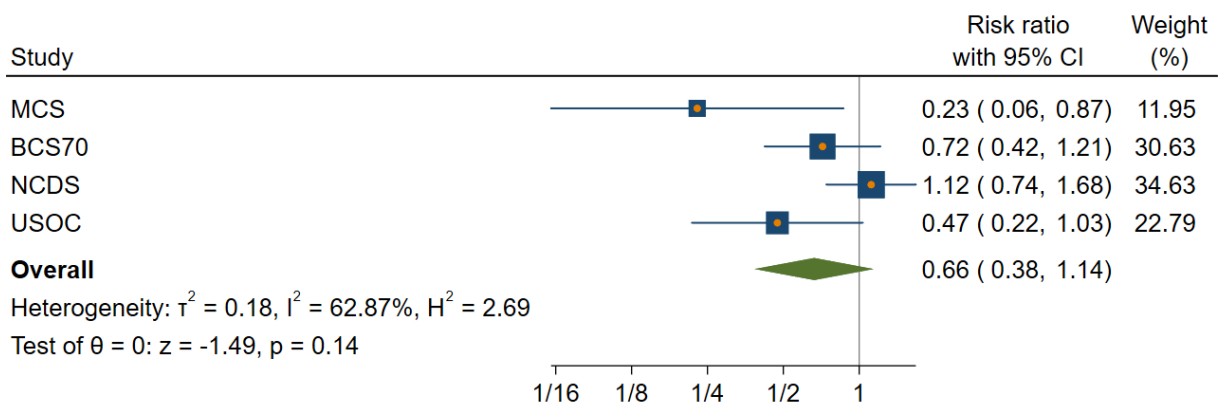

Random-effects REML model

Currently drinks 5+ drinks/occasion  
Stable unemployed vs. Stable employed

unadjusted

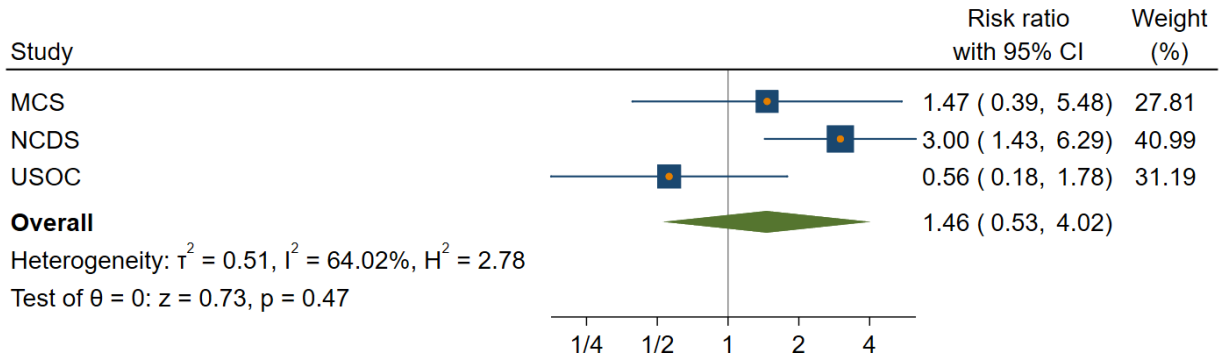

Random-effects REML model

Currently drinks 5+ drinks/occasion  
Stable unemployed vs. Stable employed

basic adjustment

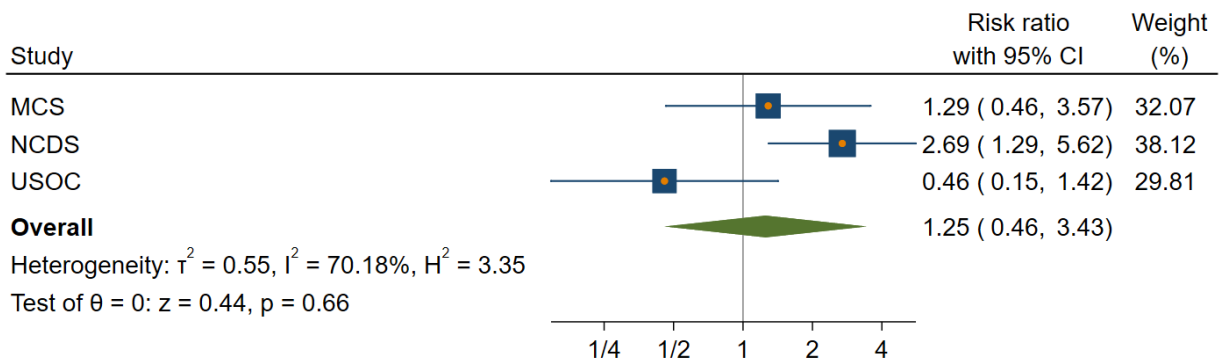

Random-effects REML model

Currently drinks 5+ drinks/occasion  
Stable unemployed vs. Stable employed

full adjustment

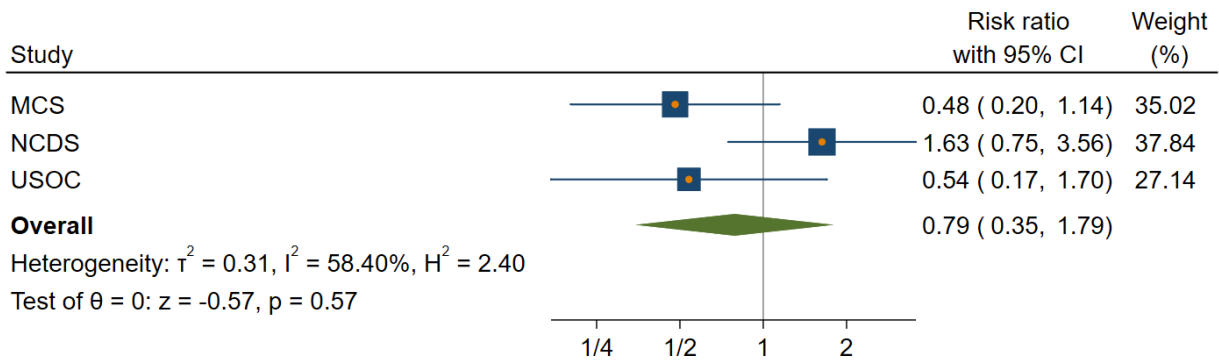

Random-effects REML model

## Figure set 5. Drinks more alcohol units per occasion

Drinks more alcohol units per occasion  
Furloughed vs. Stable employed

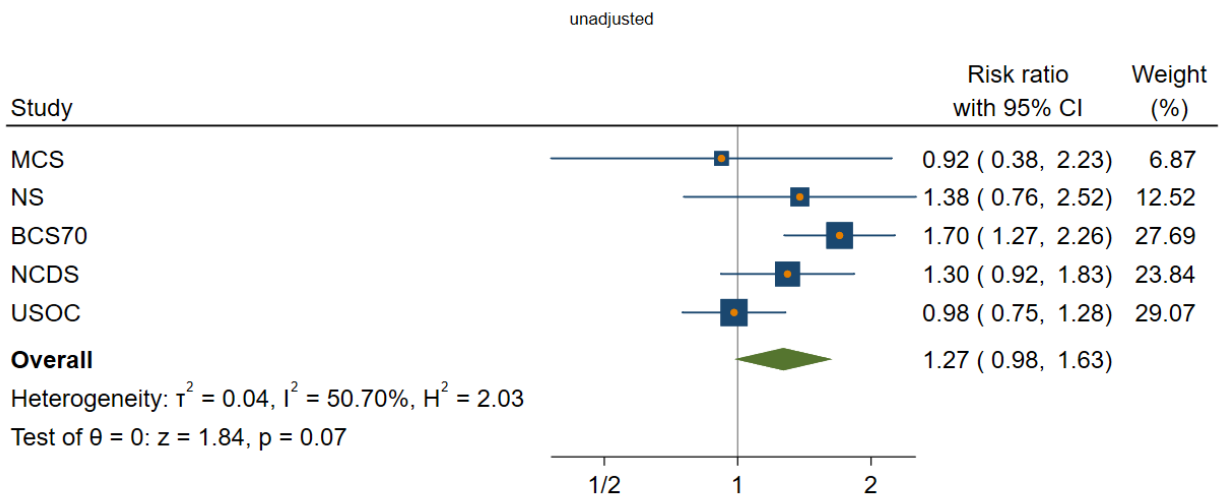

Random-effects REML model

Drinks more alcohol units per occasion  
Furloughed vs. Stable employed

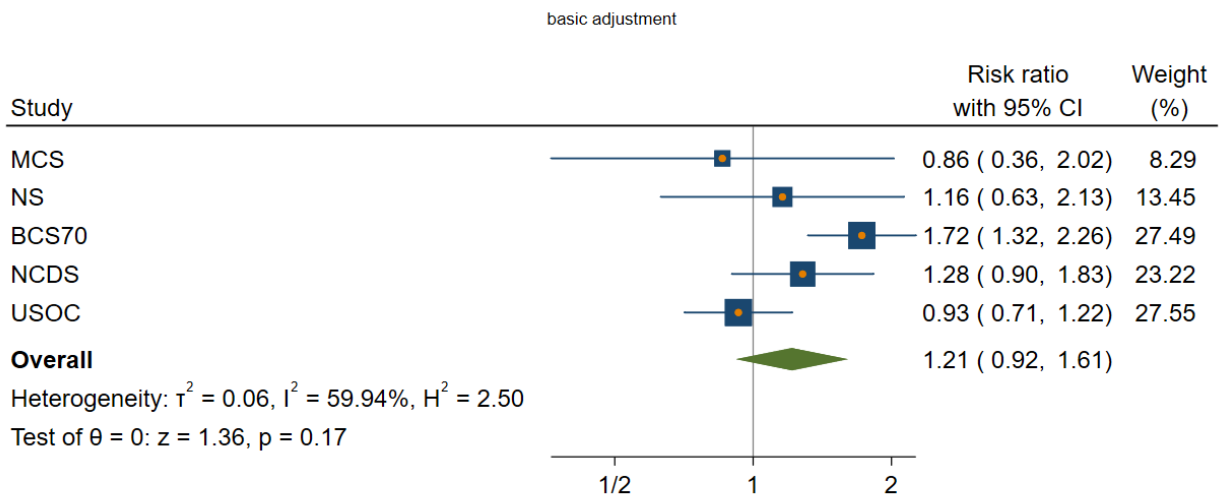

Random-effects REML model

Drinks more alcohol units per occasion  
Furloughed vs. Stable employed

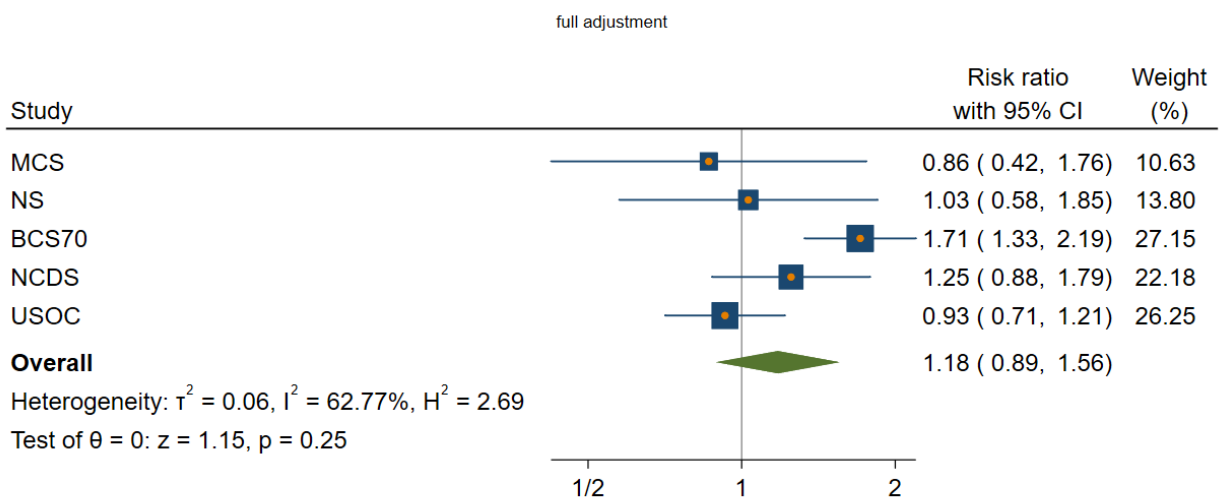

Random-effects REML model

Drinks more alcohol units per occasion  
No longer employed vs. Stable employed

unadjusted

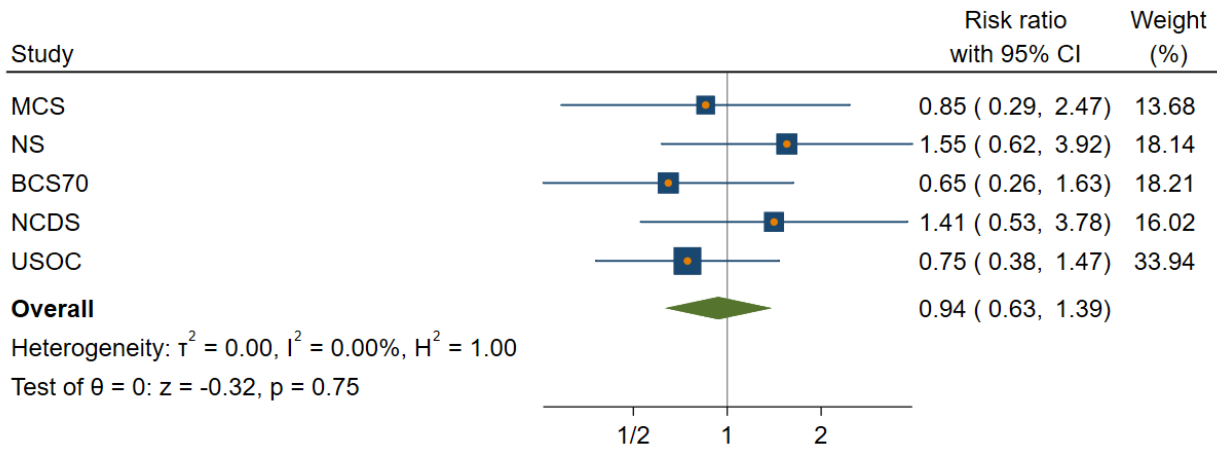

Random-effects REML model

Drinks more alcohol units per occasion  
No longer employed vs. Stable employed

basic adjustment

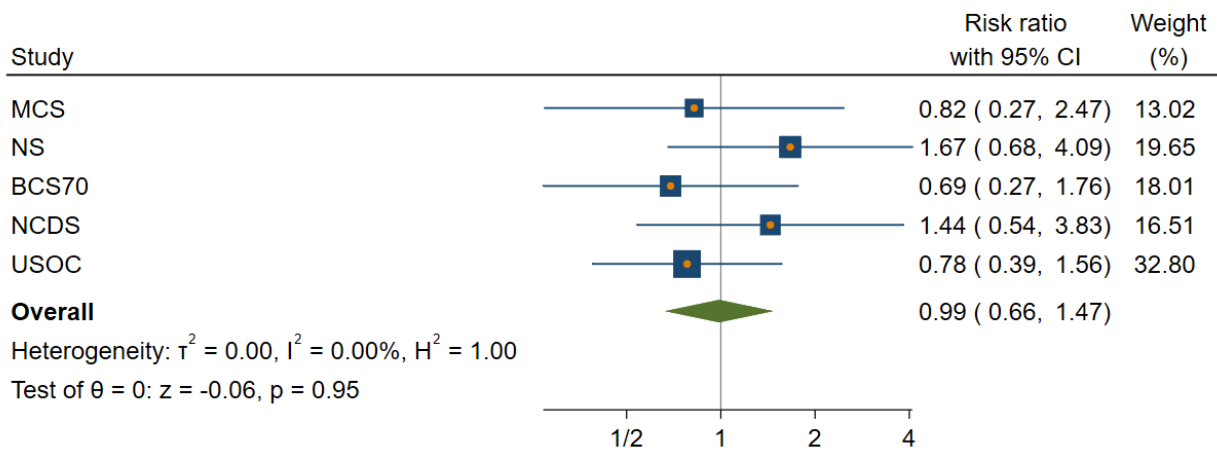

Random-effects REML model

Drinks more alcohol units per occasion  
No longer employed vs. Stable employed

full adjustment

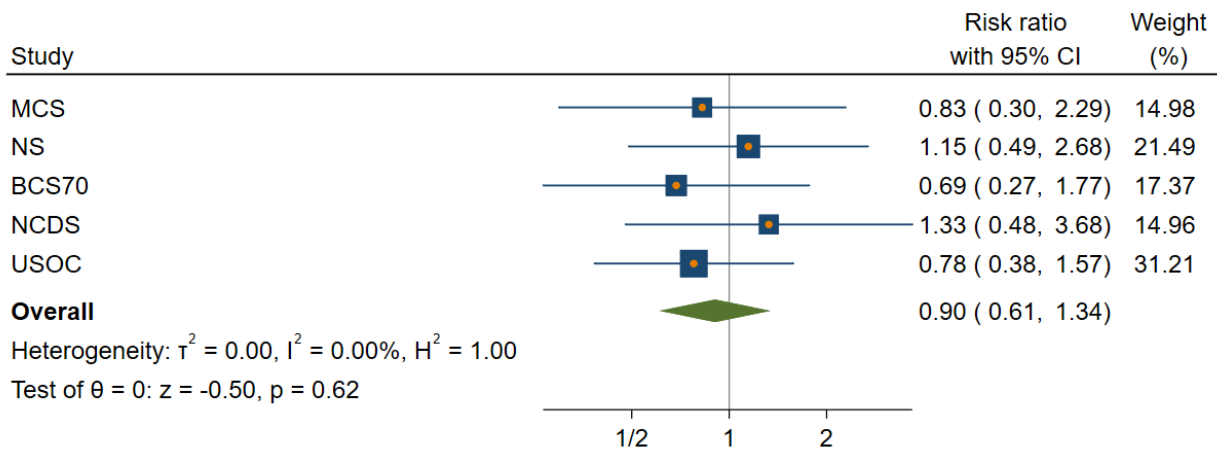

Random-effects REML model

Drinks more alcohol units per occasion  
Stable unemployed vs. Stable employed

unadjusted

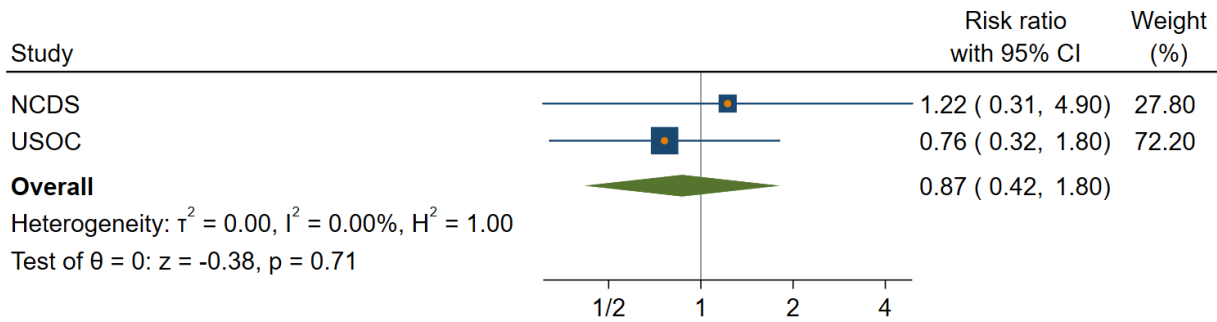

Random-effects REML model

Drinks more alcohol units per occasion  
Stable unemployed vs. Stable employed

basic adjustment

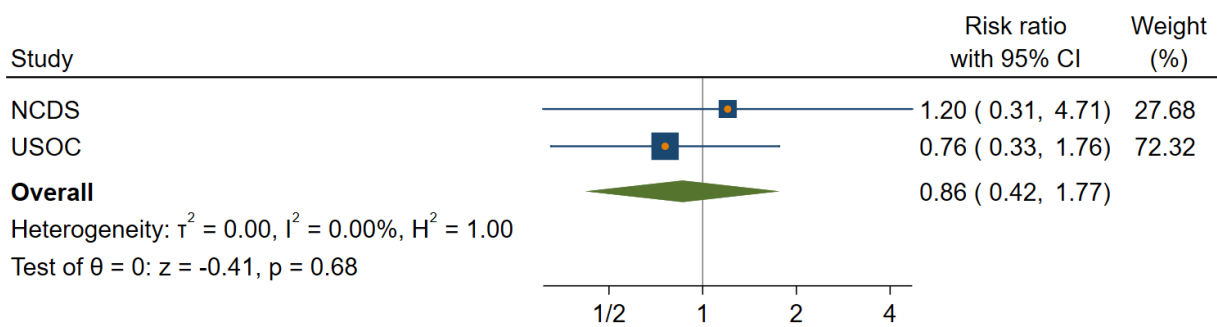

Random-effects REML model

Drinks more alcohol units per occasion  
Stable unemployed vs. Stable employed

full adjustment

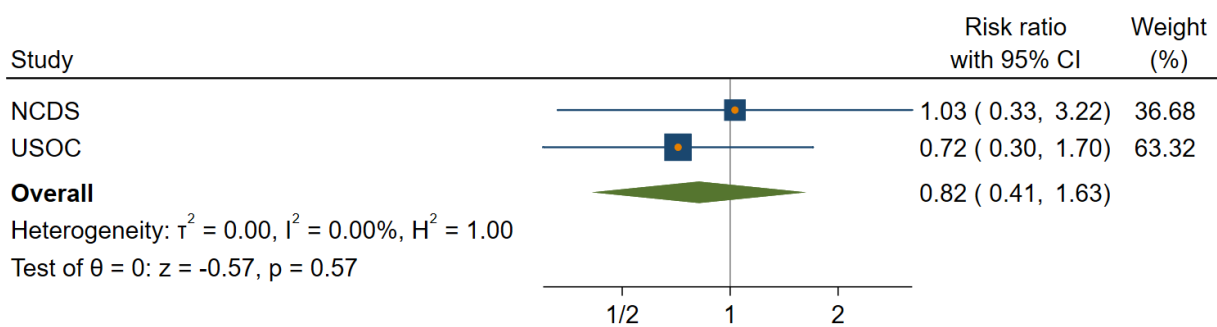

Random-effects REML model

## Figure set 6. Drinks fewer alcohol units per occasion

Drinks fewer alcohol units per occasion  
Furloughed vs. Stable employed

unadjusted

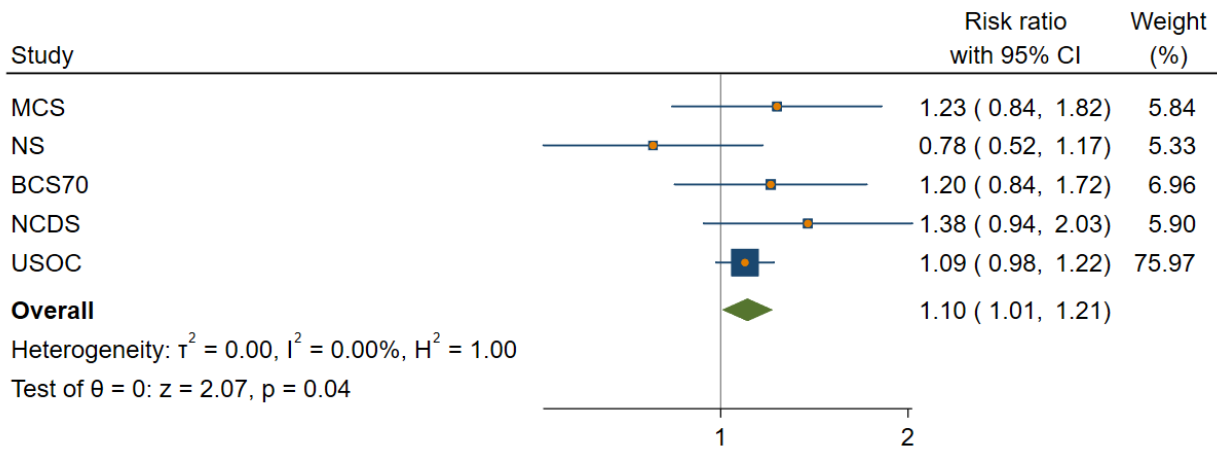

Random-effects REML model

Drinks fewer alcohol units per occasion  
Furloughed vs. Stable employed

basic adjustment

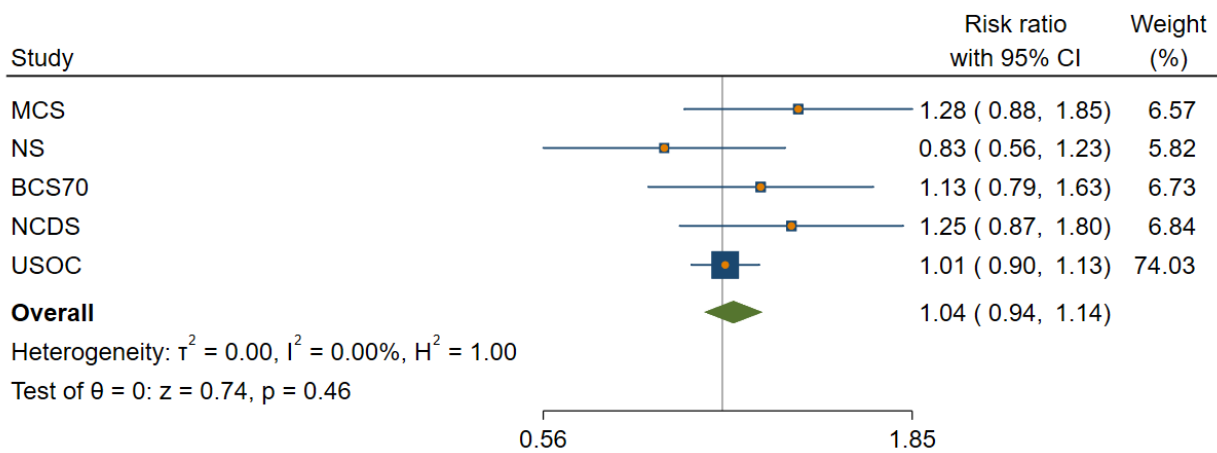

Random-effects REML model

Drinks fewer alcohol units per occasion  
Furloughed vs. Stable employed

full adjustment

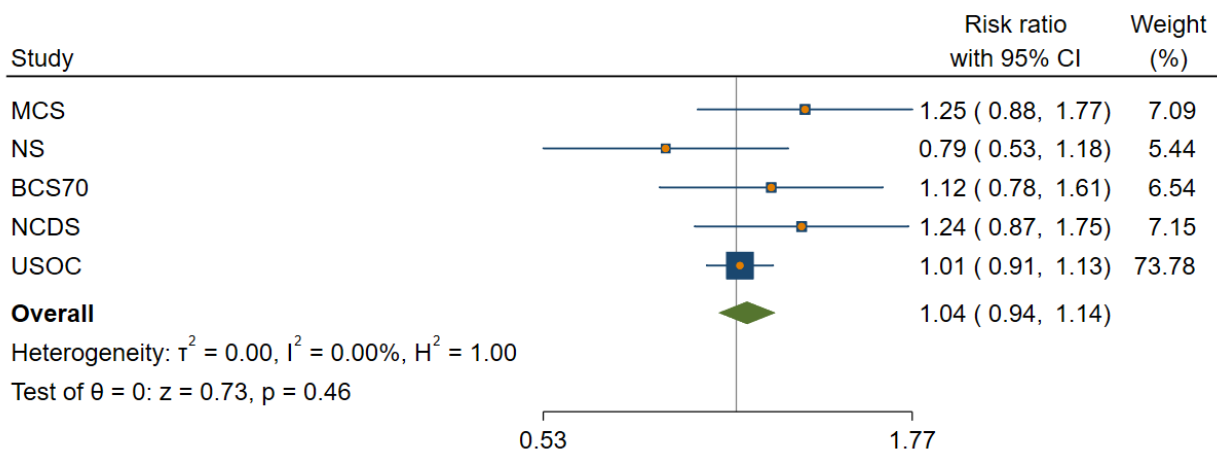

Random-effects REML model

Drinks fewer alcohol units per occasion  
No longer employed vs. Stable employed

unadjusted

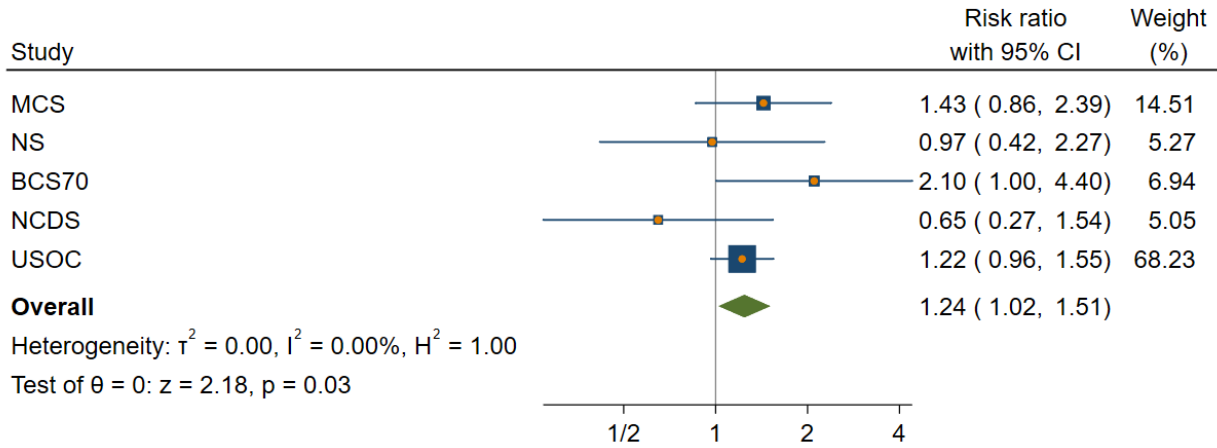

Random-effects REML model

Drinks fewer alcohol units per occasion  
No longer employed vs. Stable employed

basic adjustment

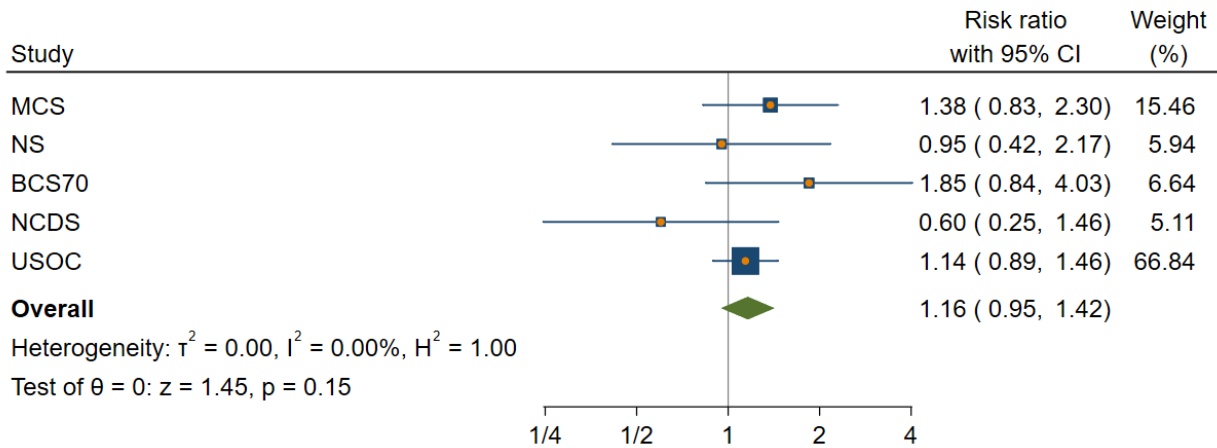

Random-effects REML model

Drinks fewer alcohol units per occasion  
No longer employed vs. Stable employed

full adjustment

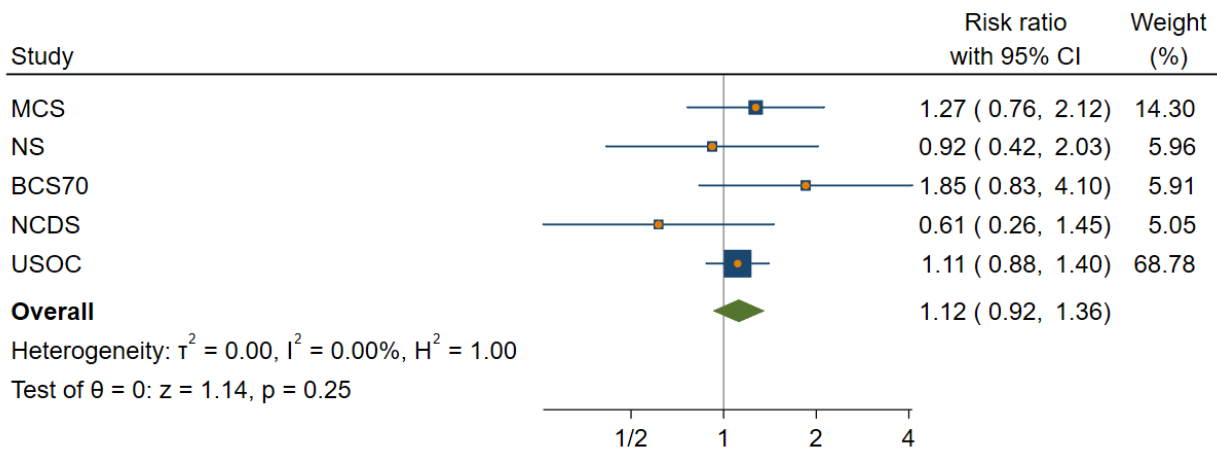

Random-effects REML model

Drinks fewer alcohol units per occasion  
Stable unemployed vs. Stable employed

unadjusted

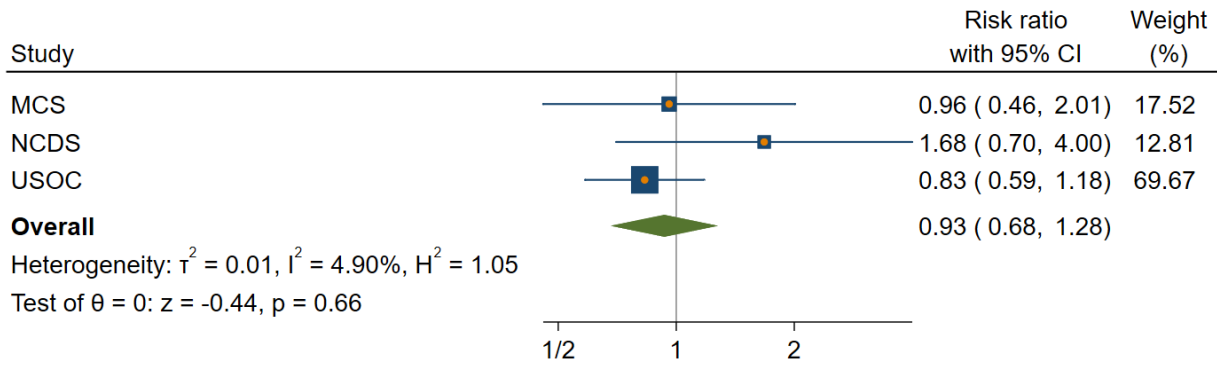

Random-effects REML model

Drinks fewer alcohol units per occasion  
Stable unemployed vs. Stable employed

basic adjustment

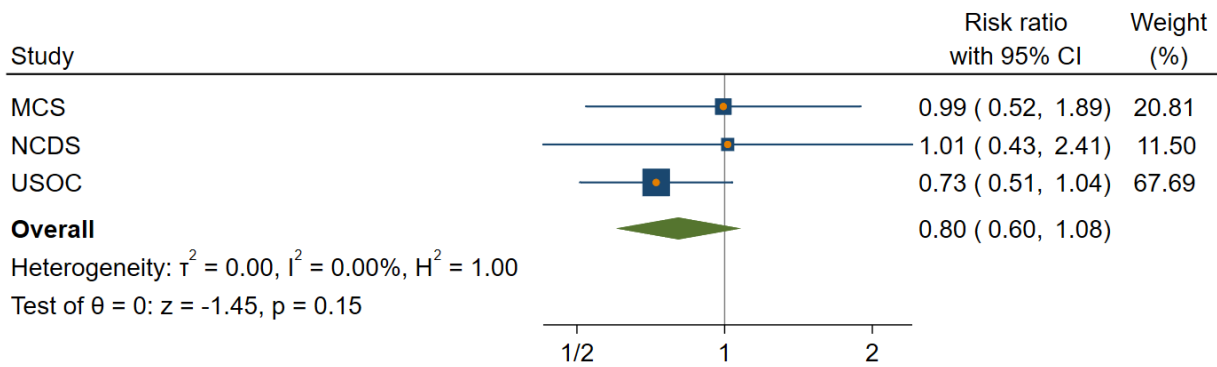

Random-effects REML model

Drinks fewer alcohol units per occasion  
Stable unemployed vs. Stable employed

full adjustment

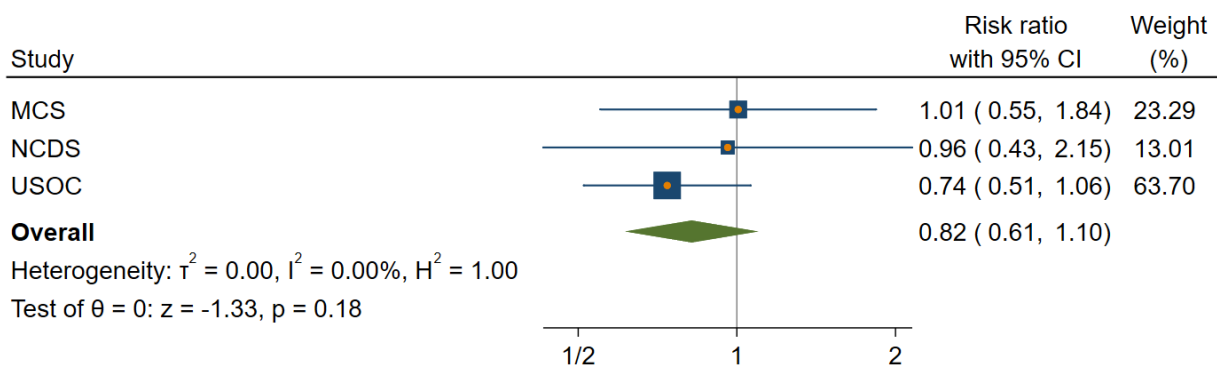

Random-effects REML model



## Figure set 7. Currently drinks 4+ days/week

Currently drinks 4+days/week  
Furloughed vs. Stable employed

unadjusted

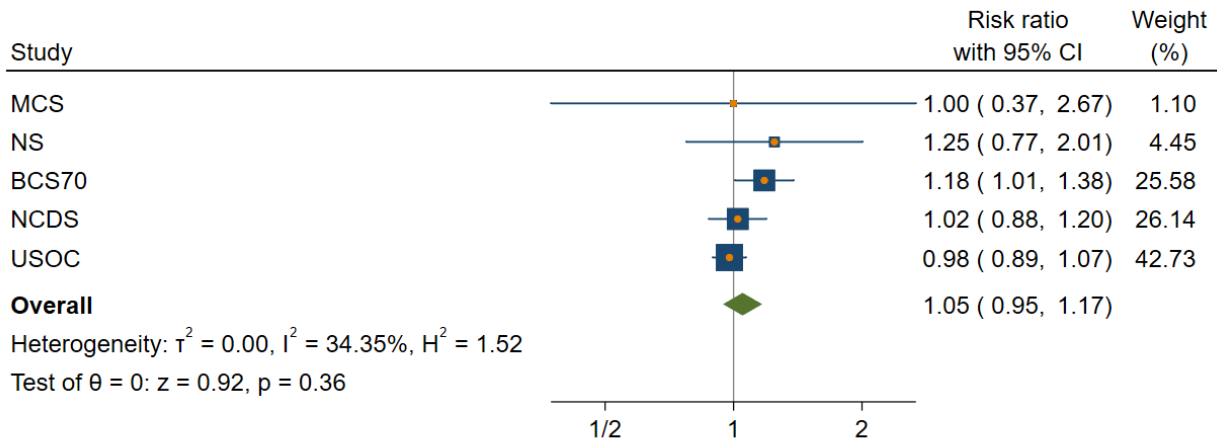

Random-effects REML model

Currently drinks 4+days/week  
Furloughed vs. Stable employed

basic adjustment

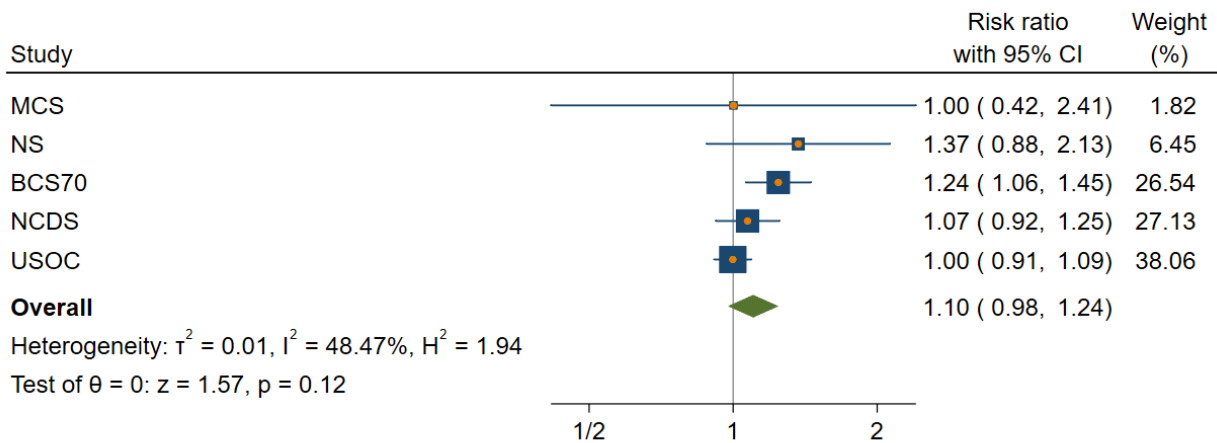

Random-effects REML model

Currently drinks 4+days/week  
Furloughed vs. Stable employed

full adjustment

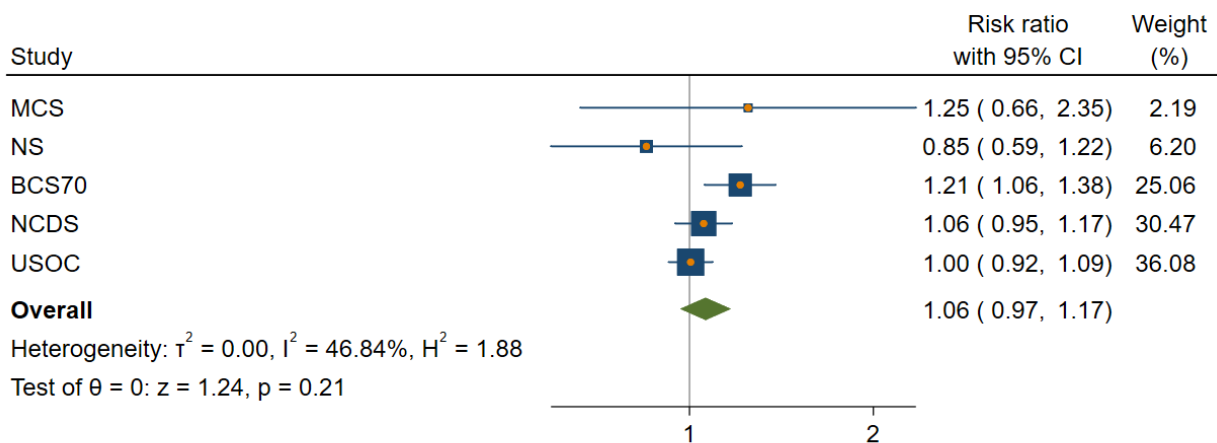

Random-effects REML model

Currently drinks 4+days/week  
No longer employed vs. Stable employed

unadjusted

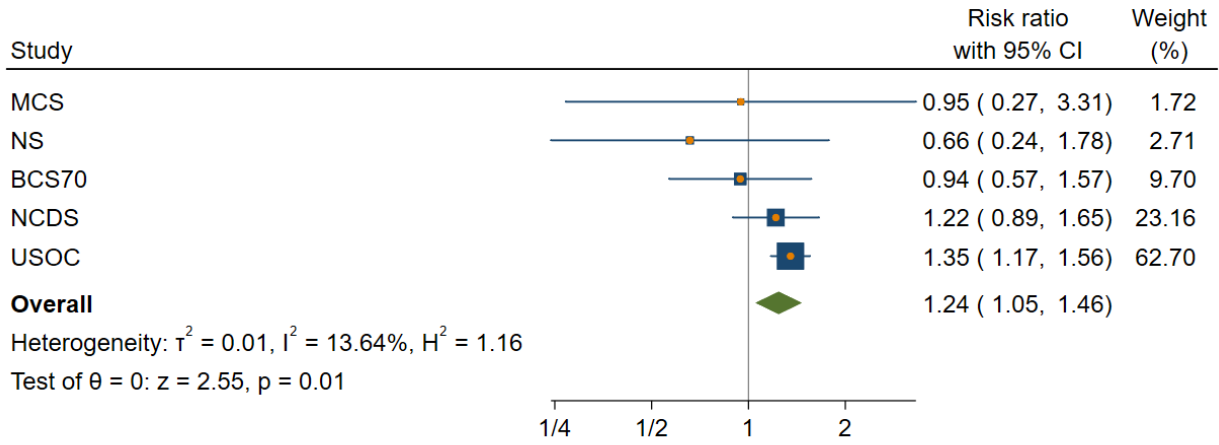

Random-effects REML model

Currently drinks 4+days/week  
No longer employed vs. Stable employed

basic adjustment

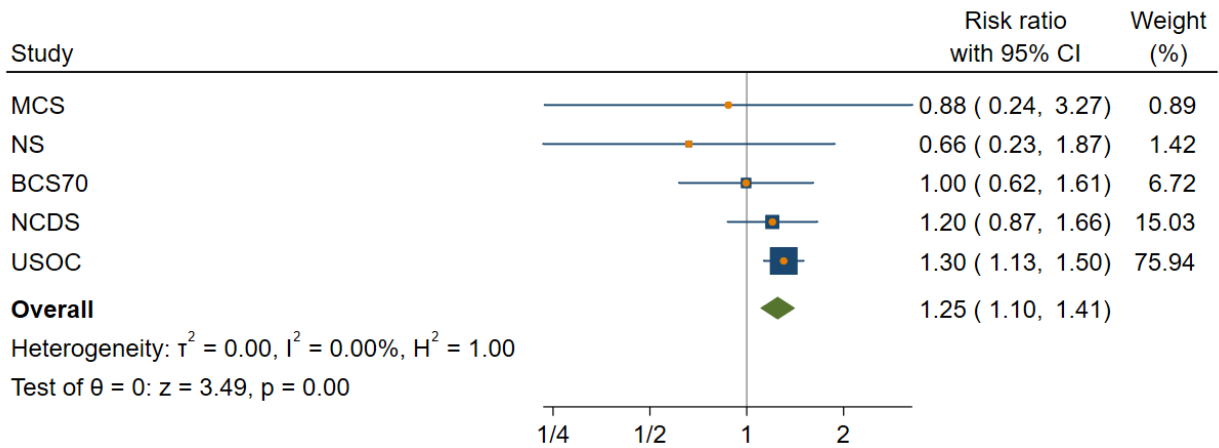

Random-effects REML model

Currently drinks 4+days/week  
No longer employed vs. Stable employed

full adjustment

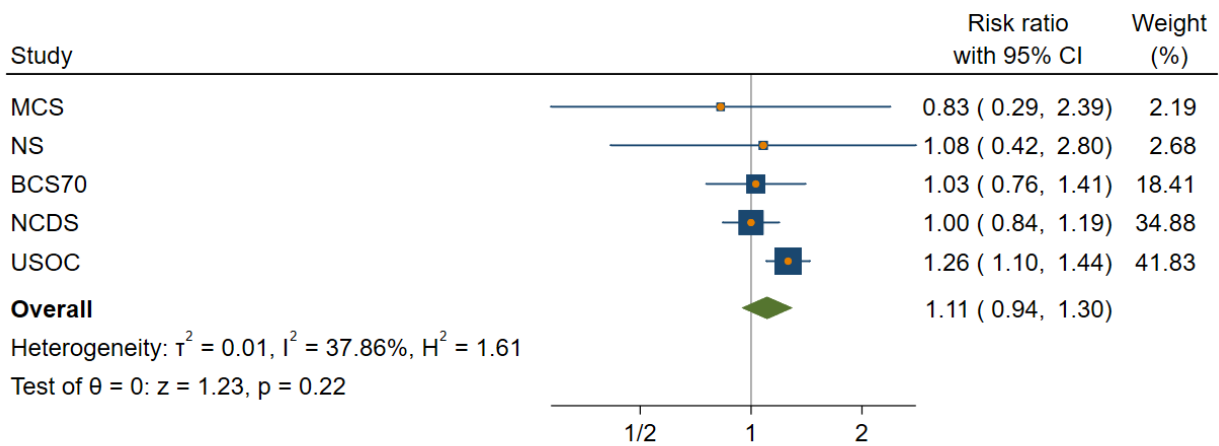

Random-effects REML model

Currently drinks 4+days/week  
Stable unemployed vs. Stable employed

unadjusted

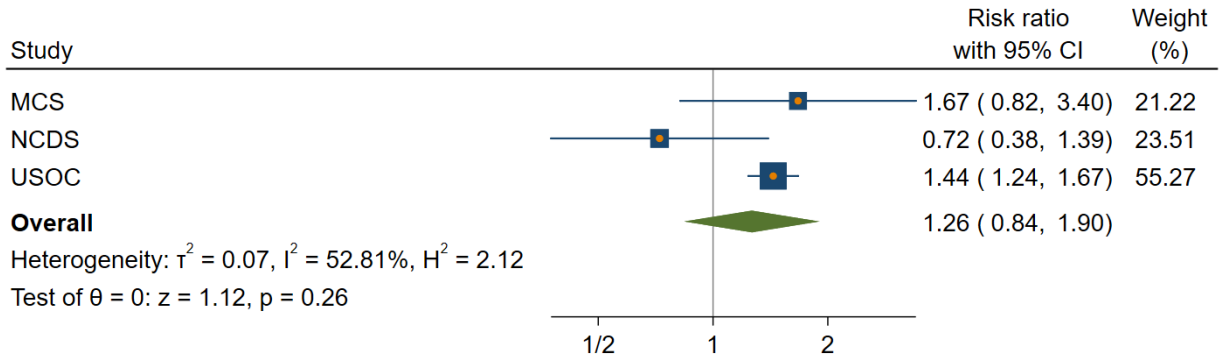

Random-effects REML model

Currently drinks 4+days/week  
Stable unemployed vs. Stable employed

basic adjustment

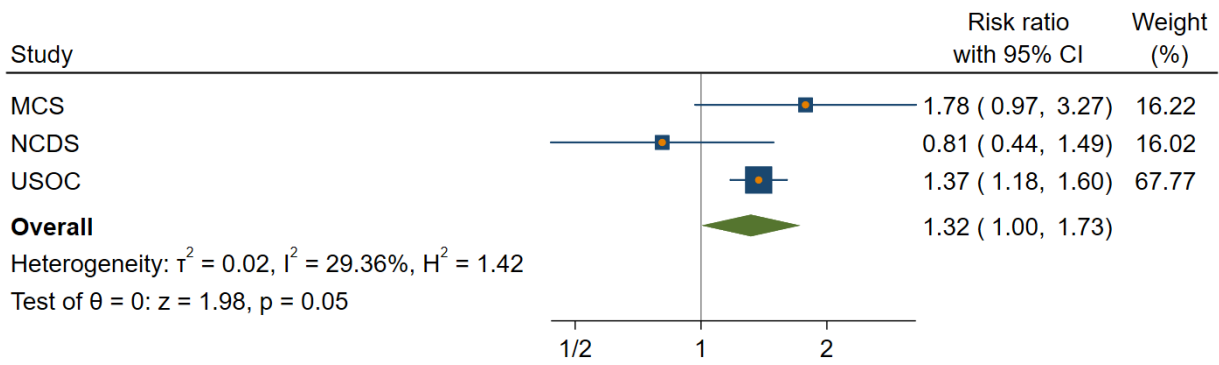

Random-effects REML model

Currently drinks 4+days/week  
Stable unemployed vs. Stable employed

full adjustment

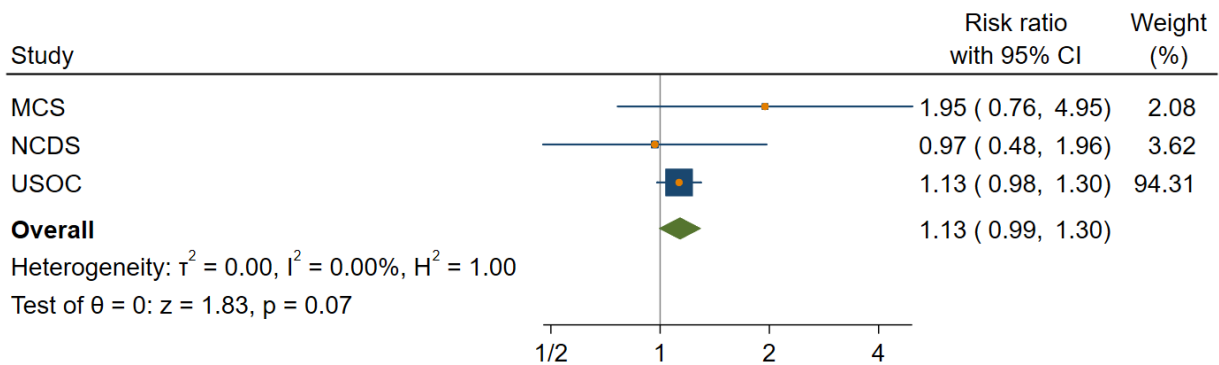

Random-effects REML model



## Figure set 8. Drinks more frequently

### Drinks more frequently Furloughed vs. Stable employed

unadjusted

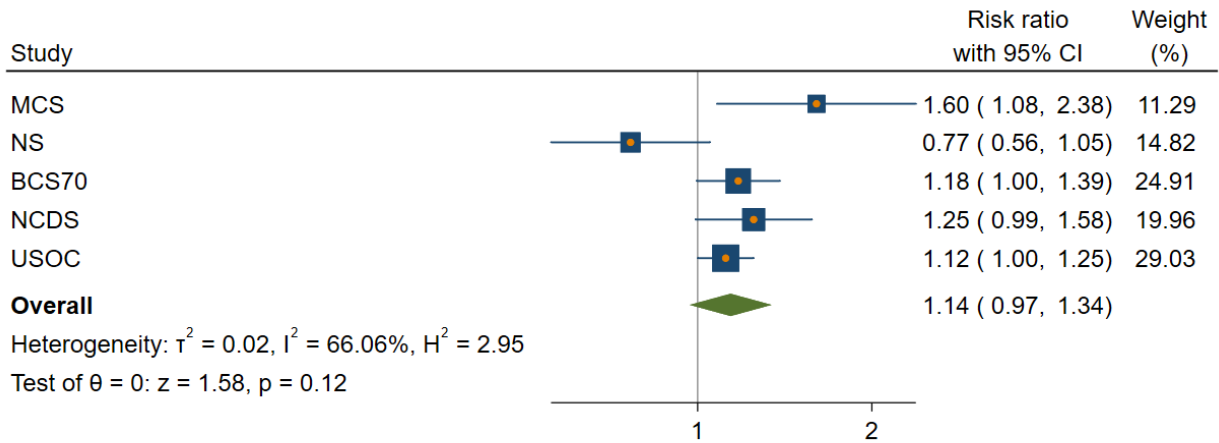

Random-effects REML model

### Drinks more frequently Furloughed vs. Stable employed

basic adjustment

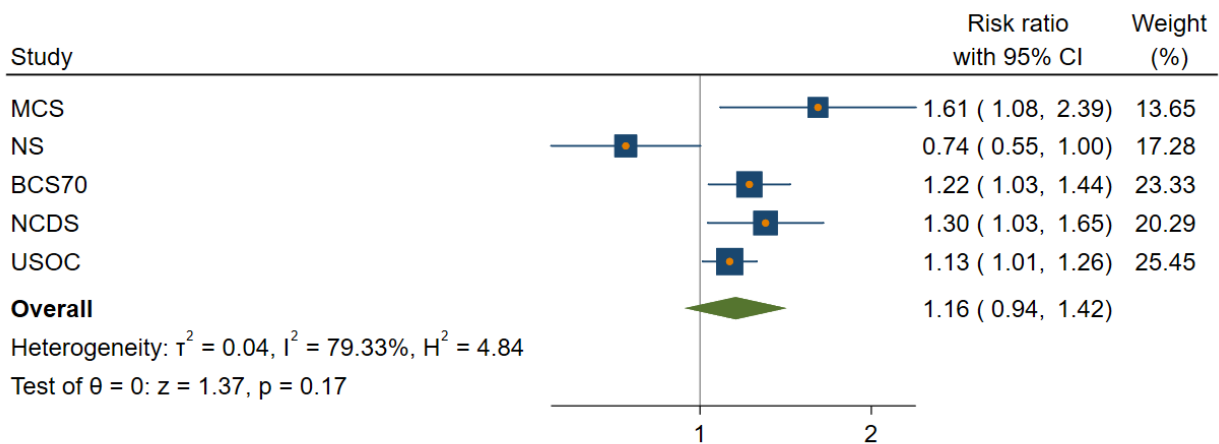

Random-effects REML model

### Drinks more frequently Furloughed vs. Stable employed

full adjustment

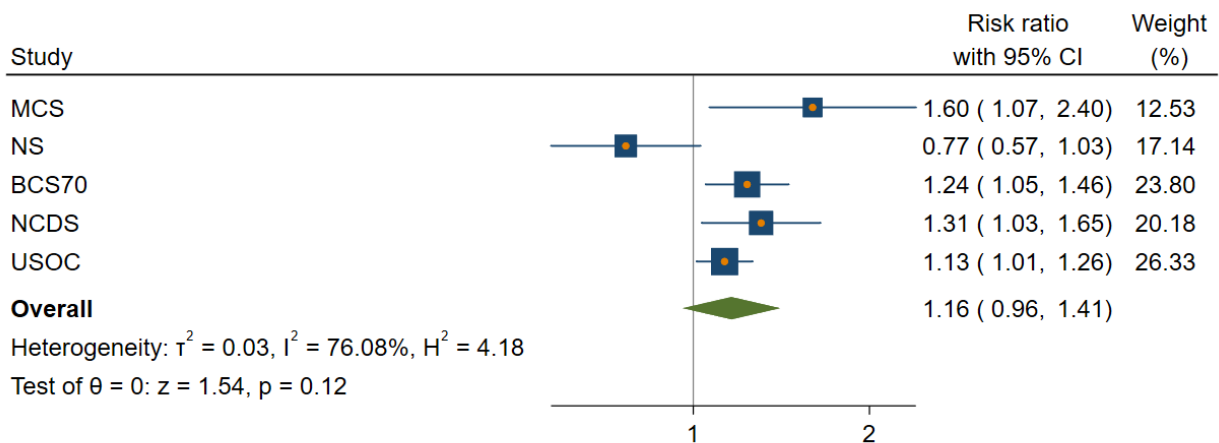

Random-effects REML model

Drinks more frequently  
No longer employed vs. Stable employed

unadjusted

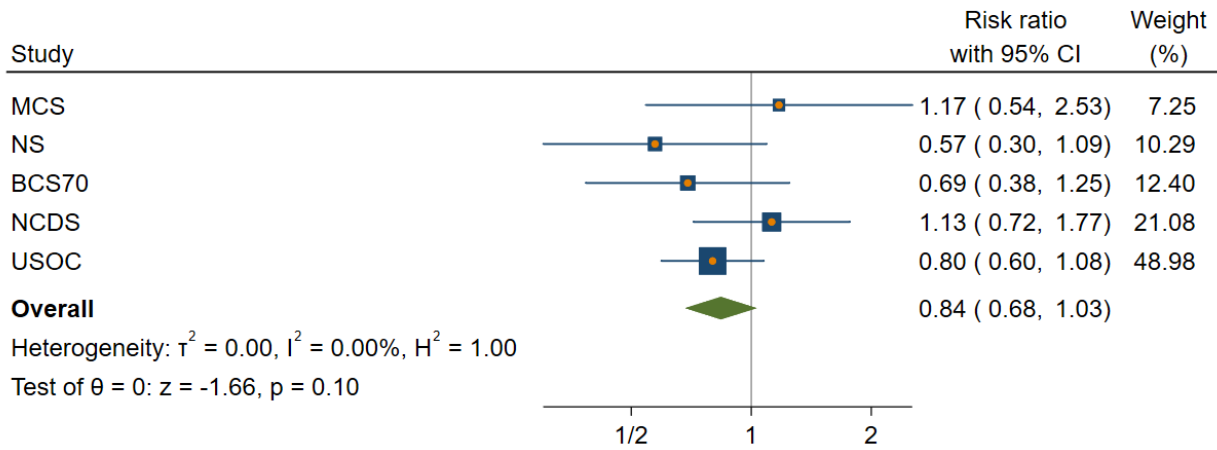

Random-effects REML model

Drinks more frequently  
No longer employed vs. Stable employed

basic adjustment

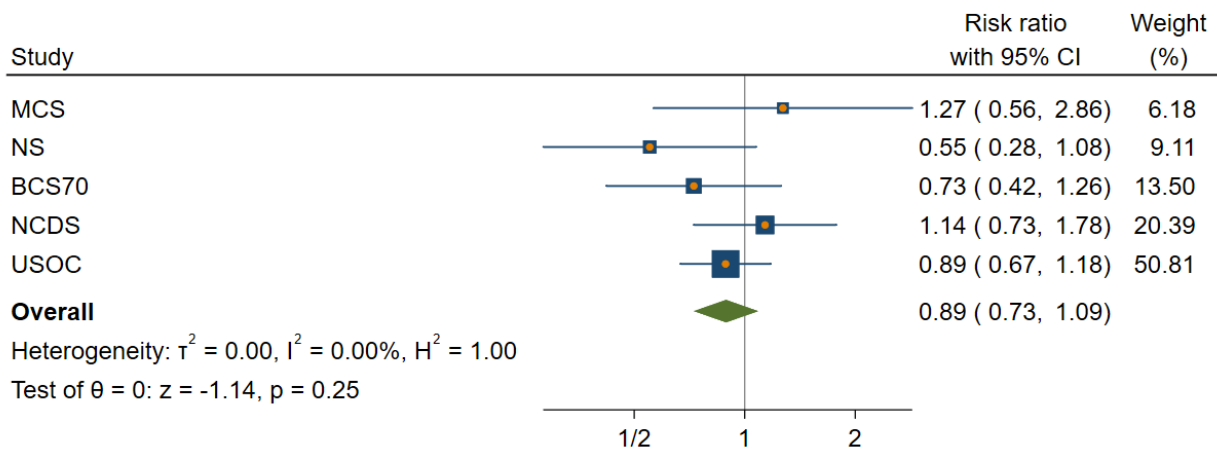

Random-effects REML model

Drinks more frequently  
No longer employed vs. Stable employed

full adjustment

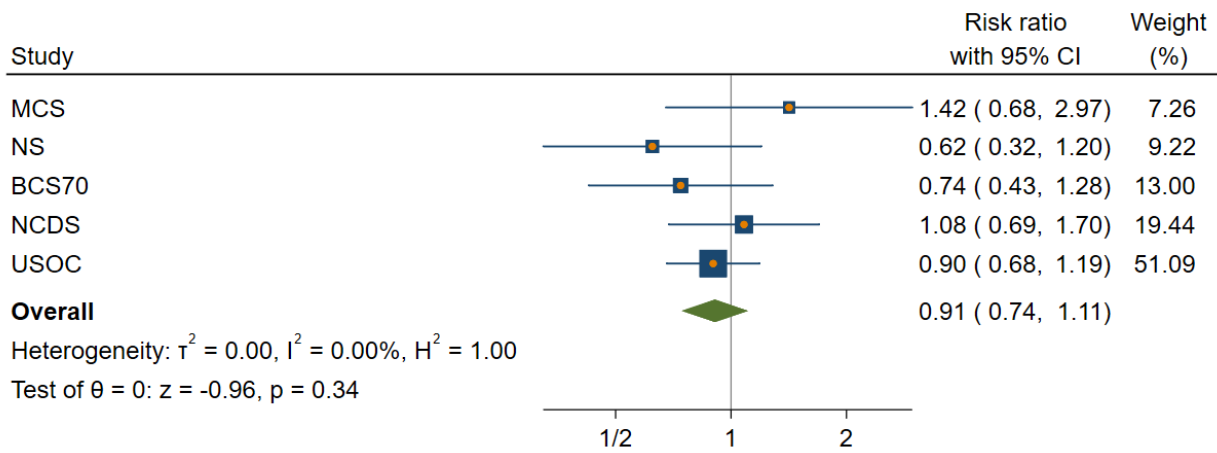

Random-effects REML model

Drinks more frequently  
Stable unemployed vs. Stable employed

unadjusted

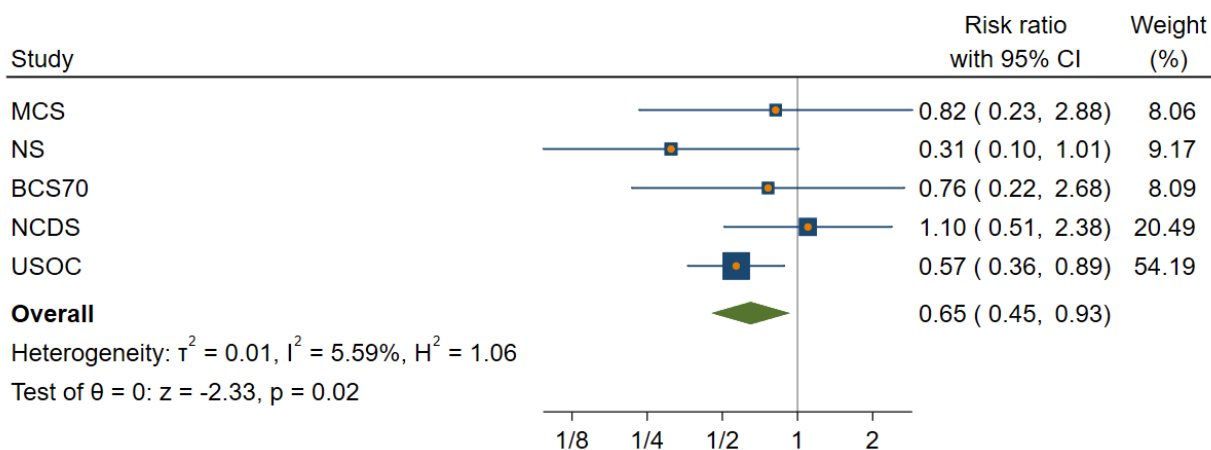

Random-effects REML model

Drinks more frequently  
Stable unemployed vs. Stable employed

basic adjustment

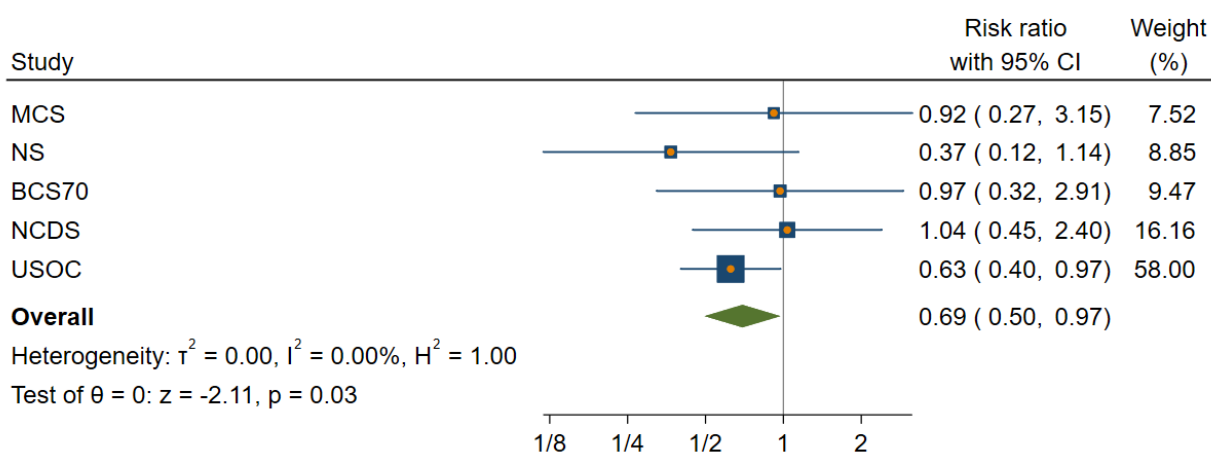

Random-effects REML model

Drinks more frequently  
Stable unemployed vs. Stable employed

full adjustment

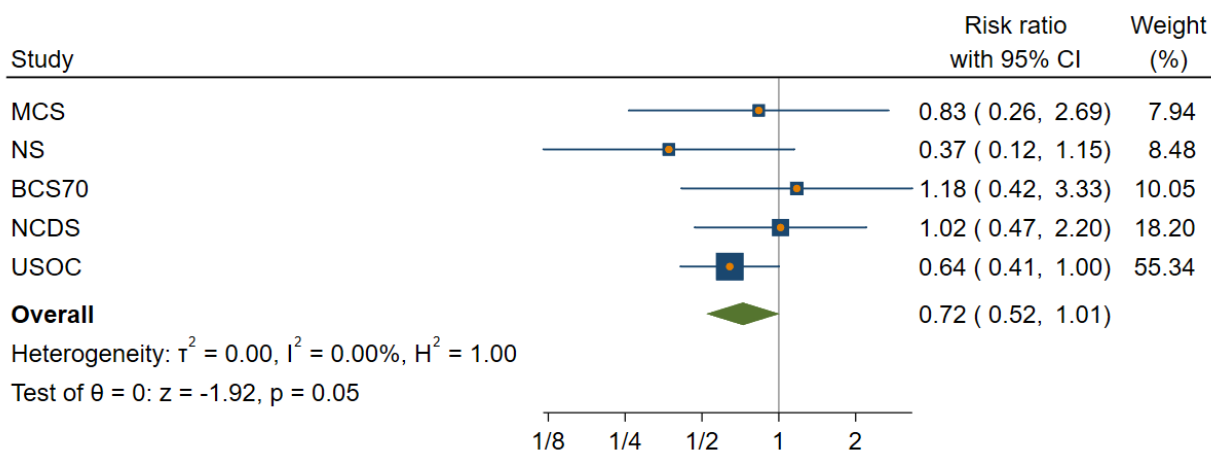

Random-effects REML model

## Figure set 9. Drinks less frequently

### Drinks less frequently Furloughed vs. Stable employed

unadjusted

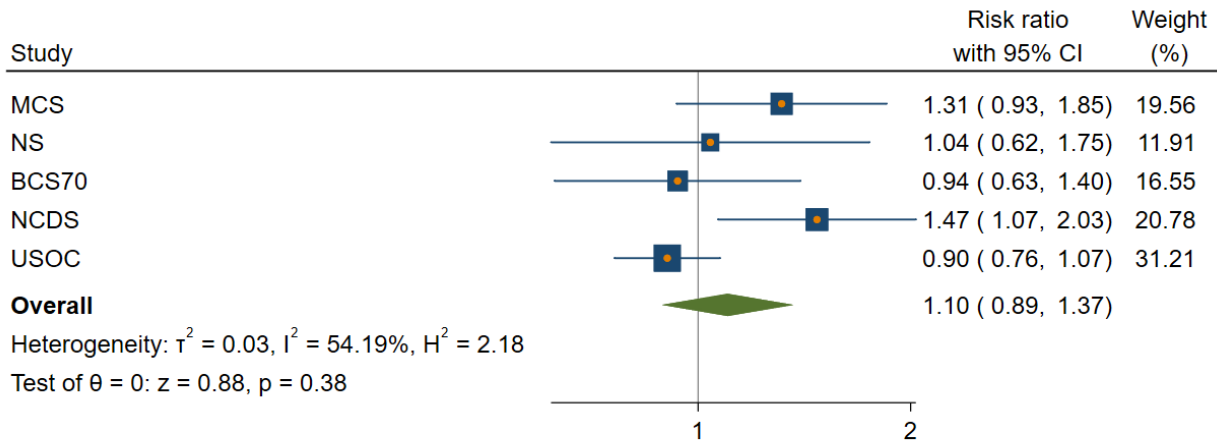

Random-effects REML model

### Drinks less frequently Furloughed vs. Stable employed

basic adjustment

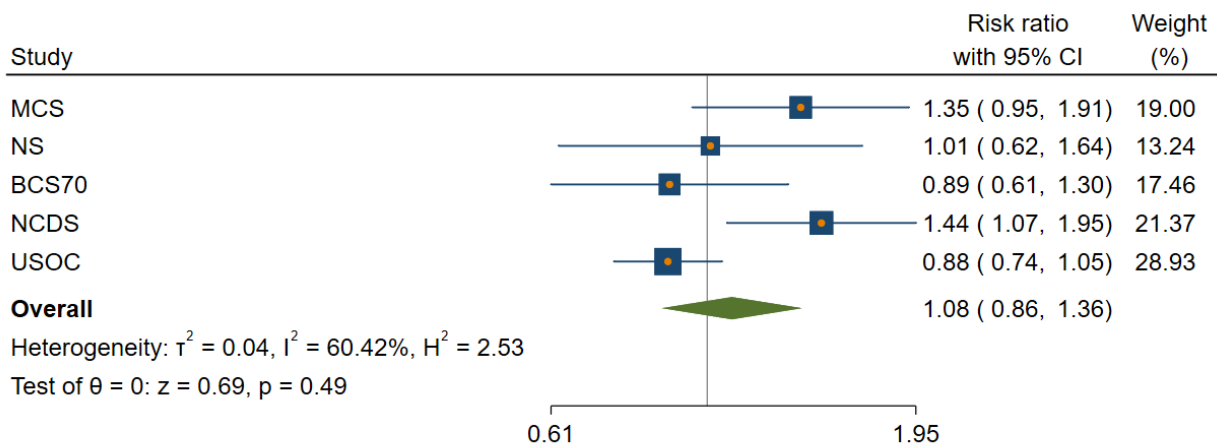

Random-effects REML model

### Drinks less frequently Furloughed vs. Stable employed

full adjustment

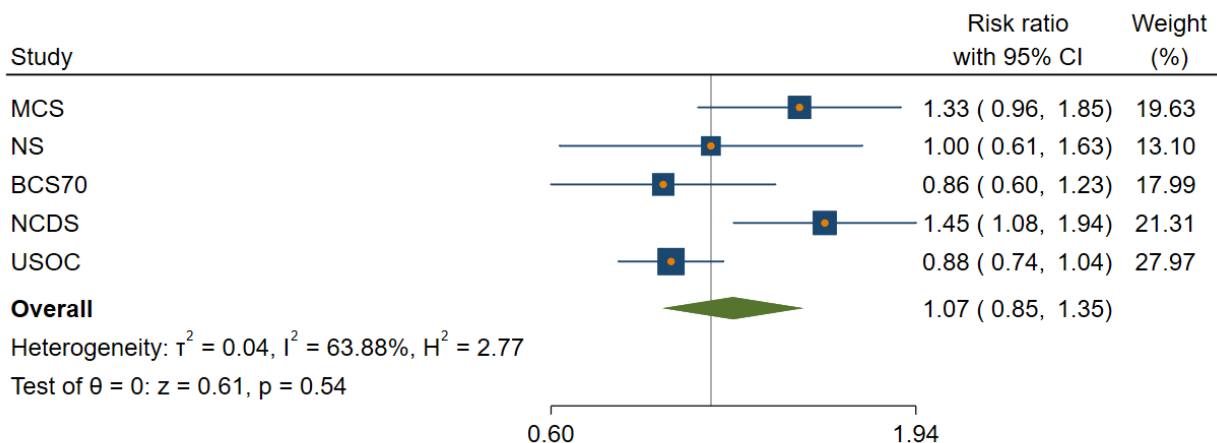

Random-effects REML model



Drinks less frequently  
No longer employed vs. Stable employed

unadjusted

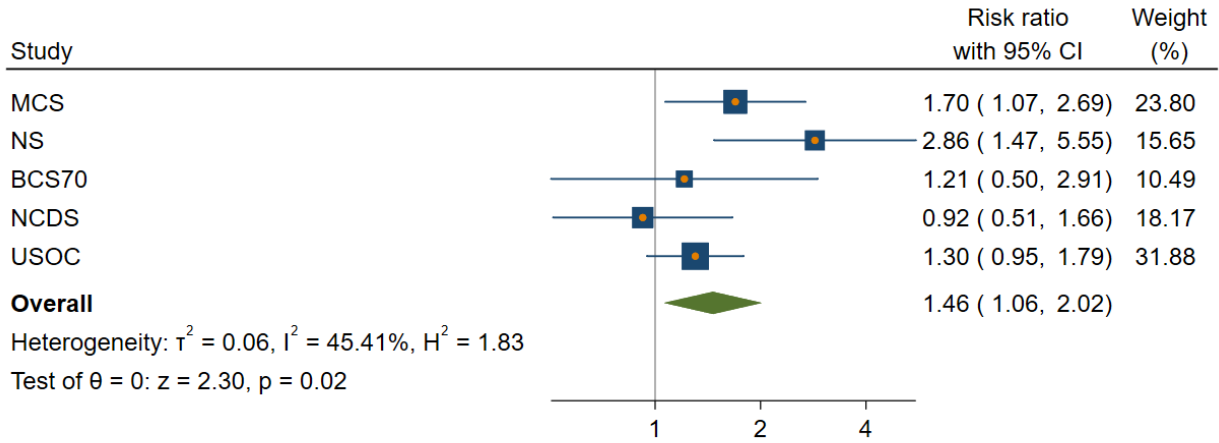

Random-effects REML model

Drinks less frequently  
No longer employed vs. Stable employed

basic adjustment

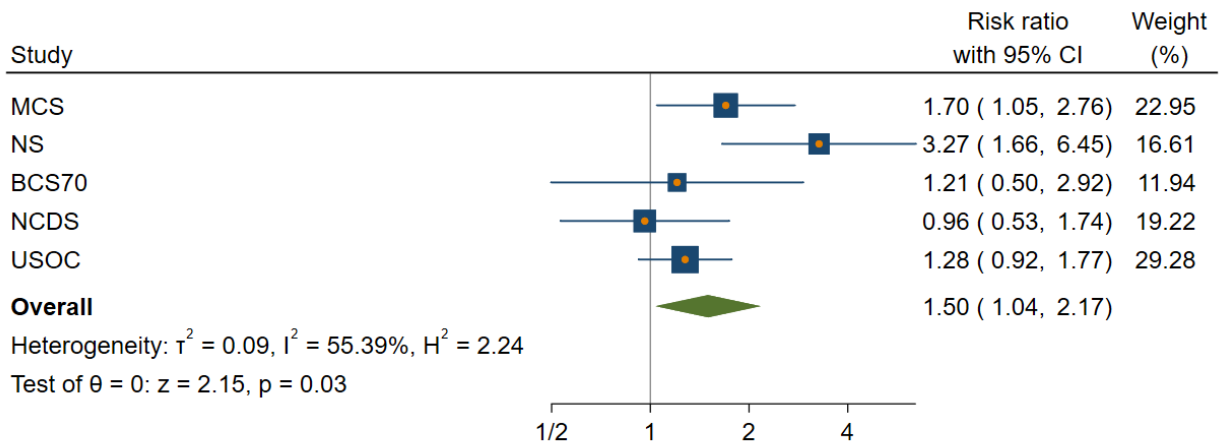

Random-effects REML model

Drinks less frequently  
No longer employed vs. Stable employed

full adjustment

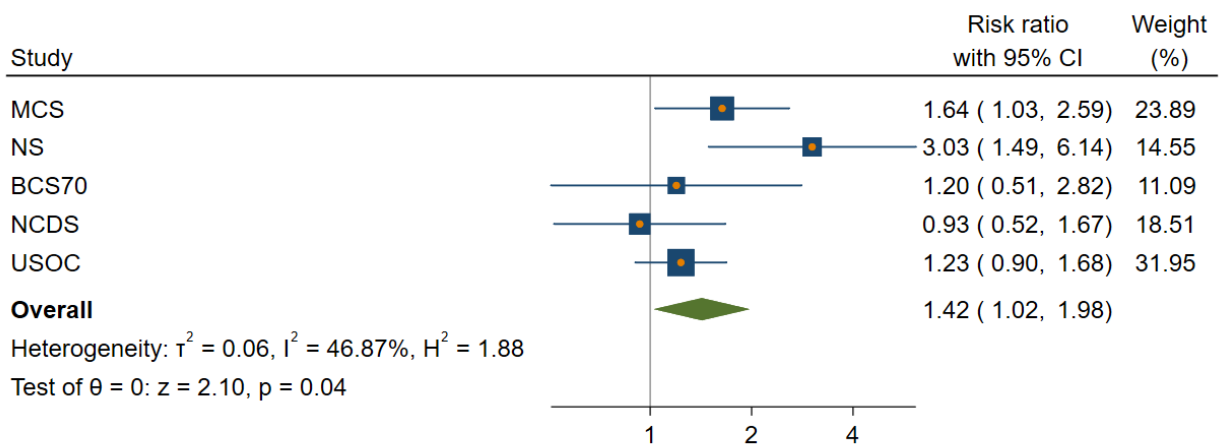

Random-effects REML model

Drinks less frequently  
Stable unemployed vs. Stable employed

unadjusted

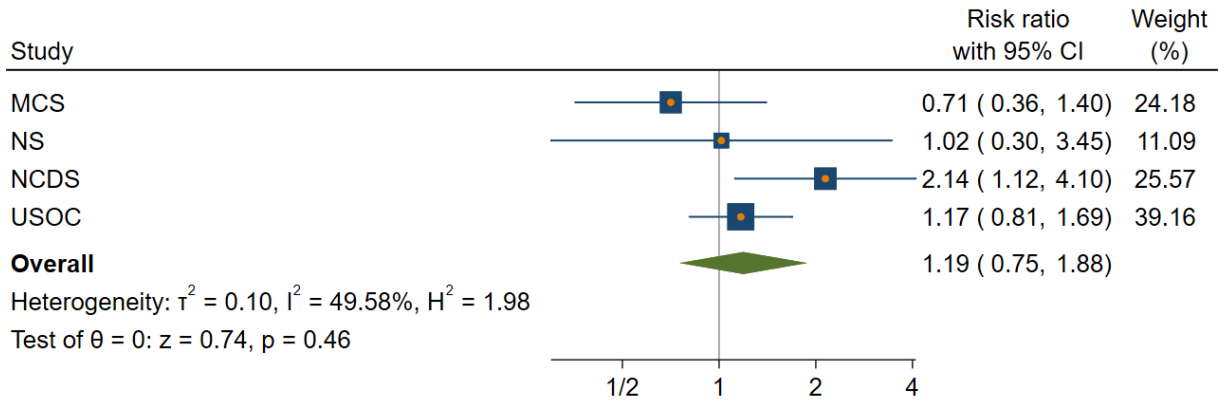

Random-effects REML model

Drinks less frequently  
Stable unemployed vs. Stable employed

basic adjustment

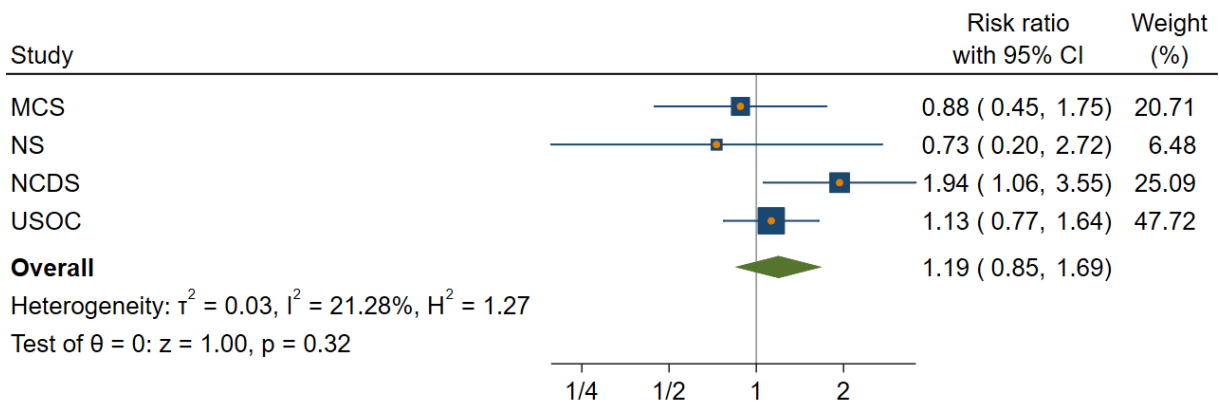

Random-effects REML model

Drinks less frequently  
Stable unemployed vs. Stable employed

full adjustment

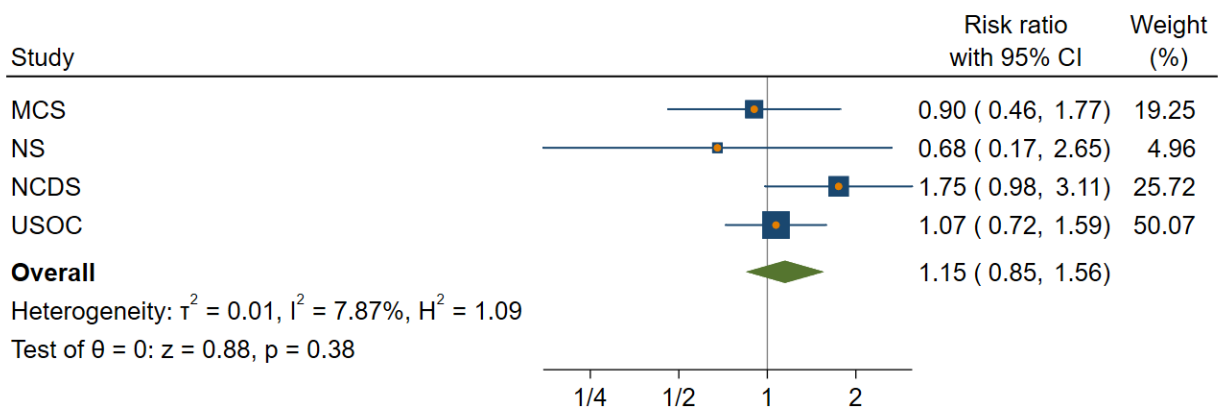

Random-effects REML model

## Figure set 10. Current smoker

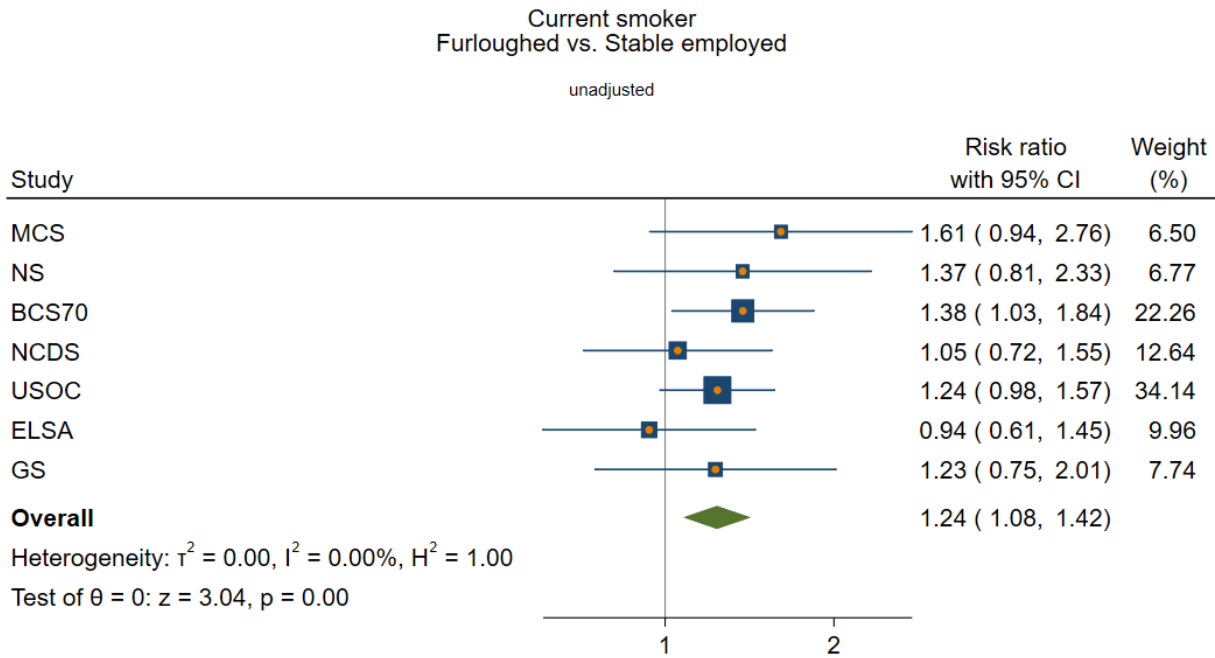

Random-effects REML model

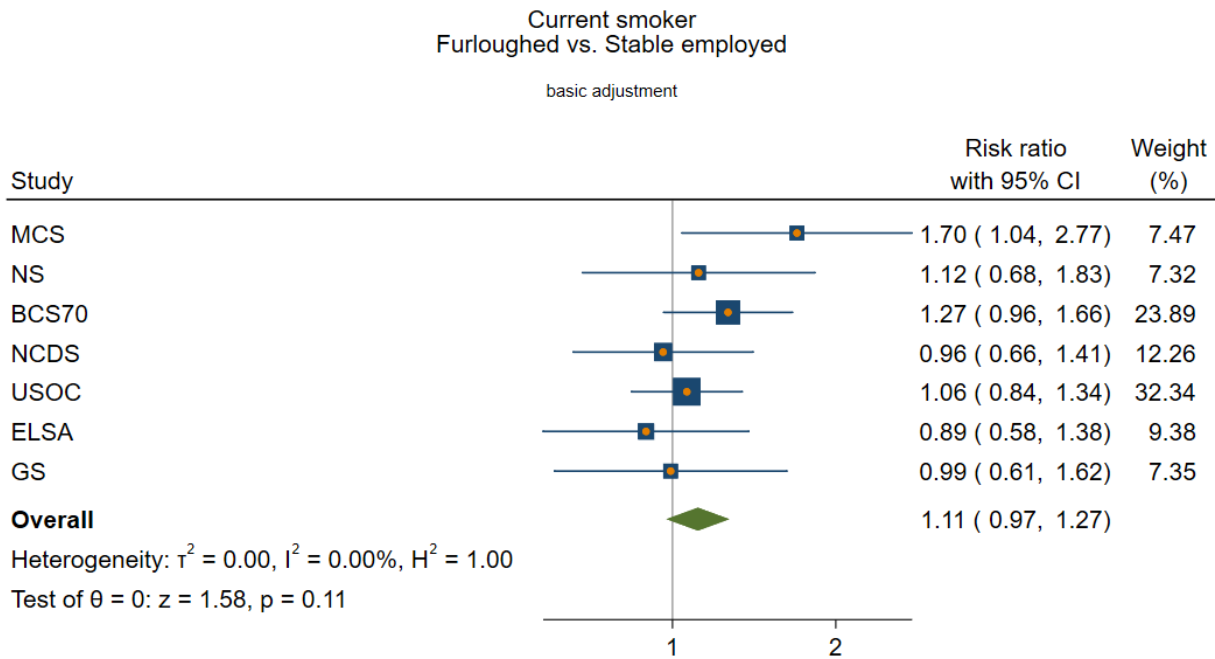

Random-effects REML model

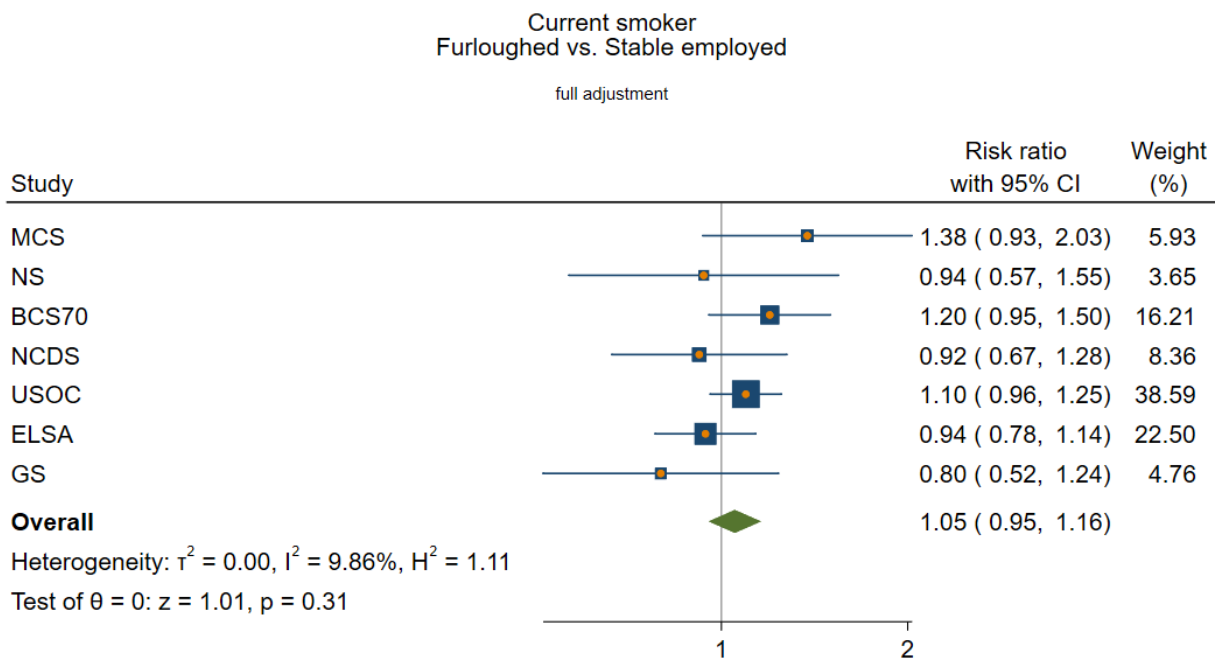

Random-effects REML model

Current smoker  
No longer employed vs. Stable employed

unadjusted

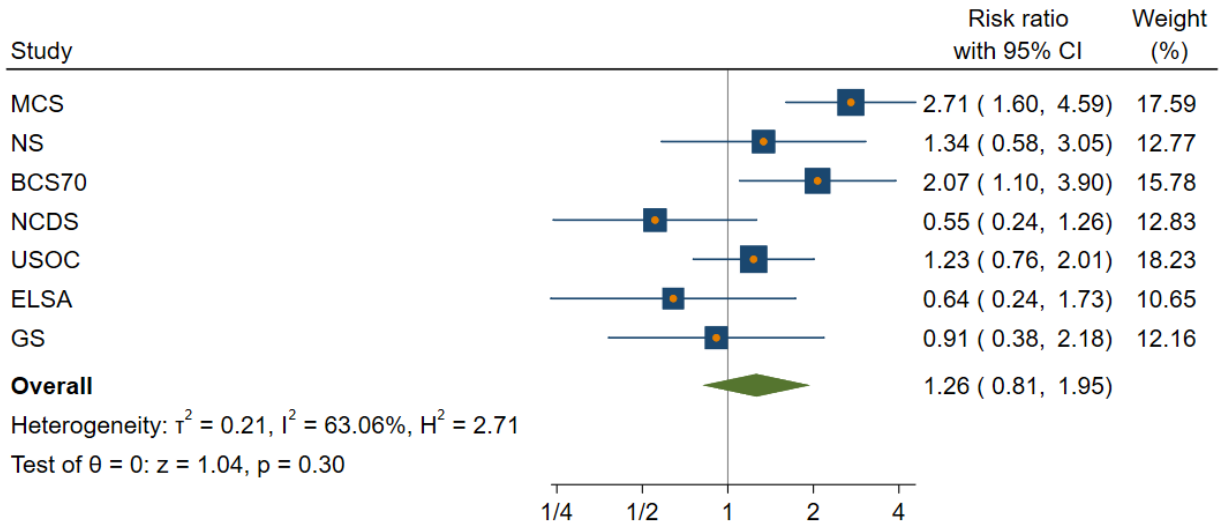

Random-effects REML model

Current smoker  
No longer employed vs. Stable employed

basic adjustment

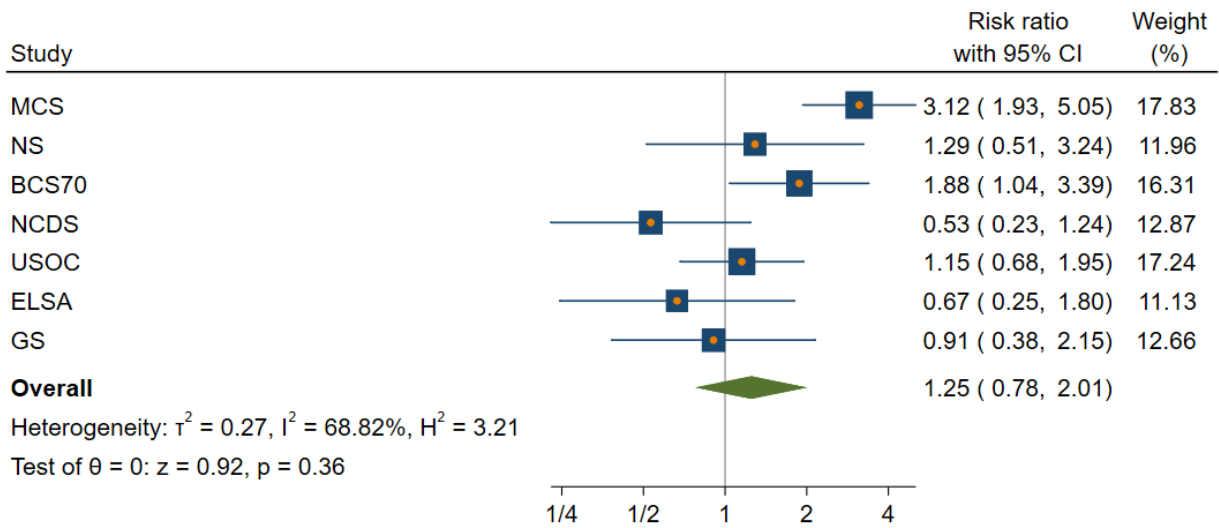

Random-effects REML model

Current smoker  
No longer employed vs. Stable employed

full adjustment

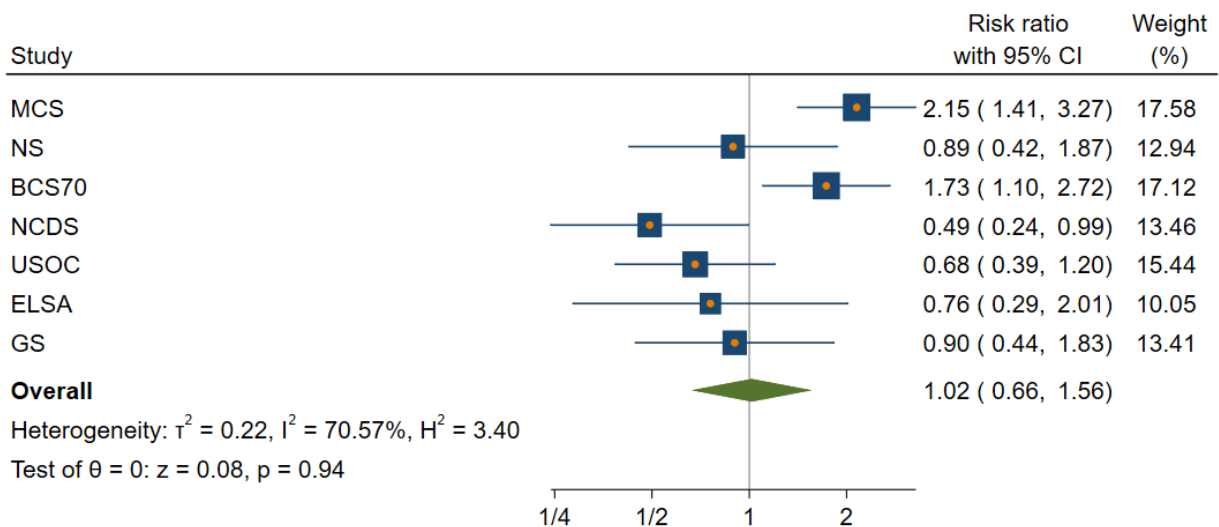

Random-effects REML model

Current smoker  
Stable unemployed vs. Stable employed

unadjusted

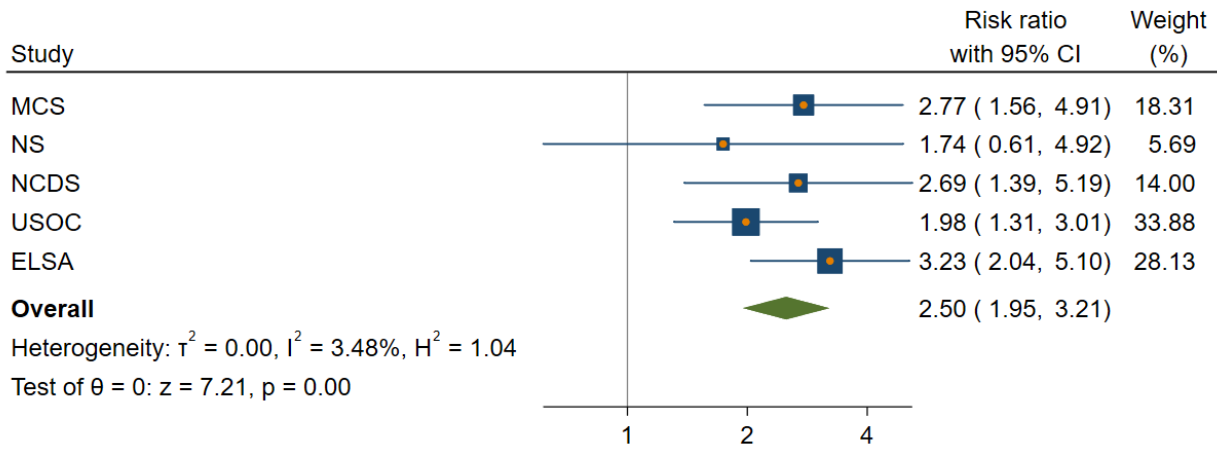

Random-effects REML model

Current smoker  
Stable unemployed vs. Stable employed

basic adjustment

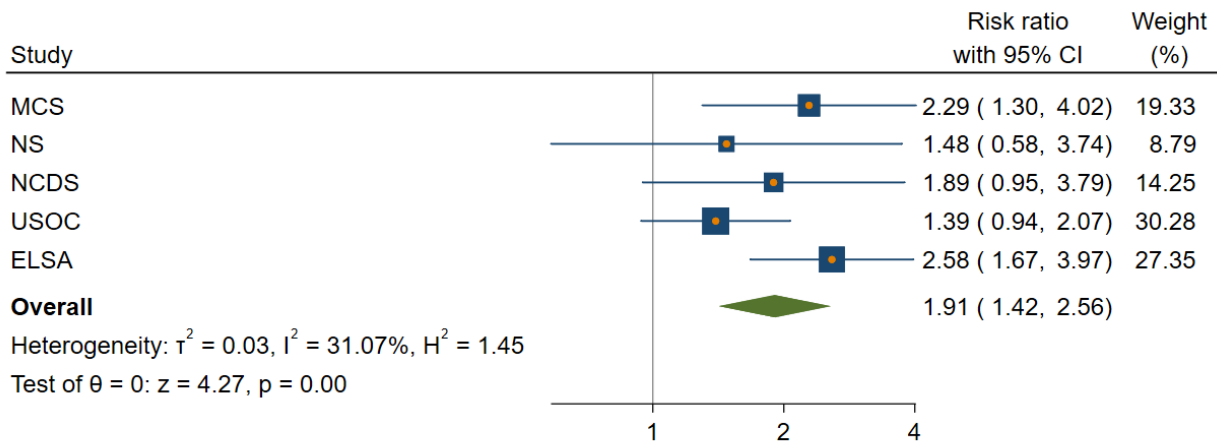

Random-effects REML model

Current smoker  
Stable unemployed vs. Stable employed

full adjustment

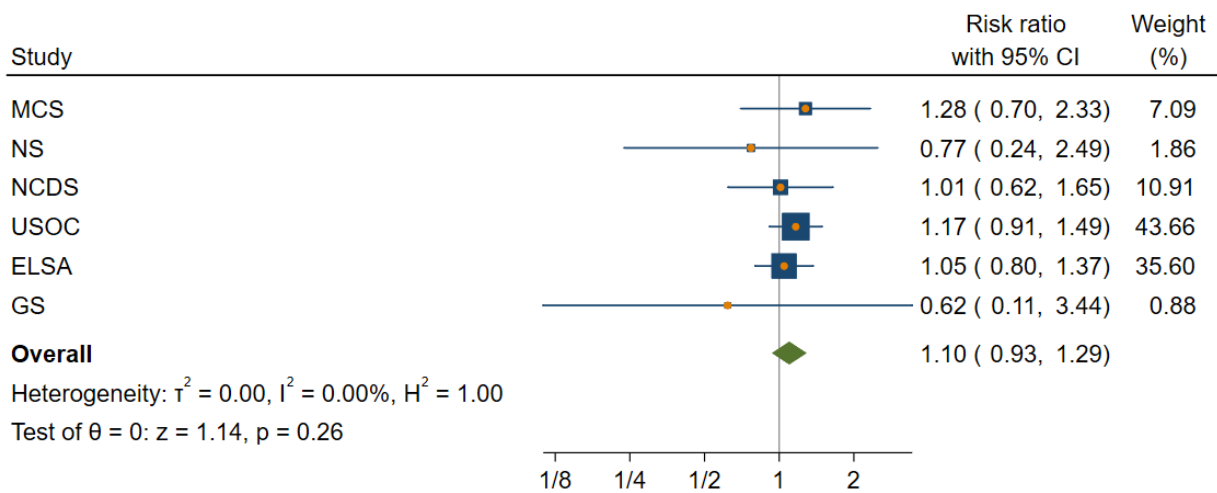

Random-effects REML model

## Figure set 11. Smoking more

Smoking more  
Furloughed vs. Stable employed

unadjusted

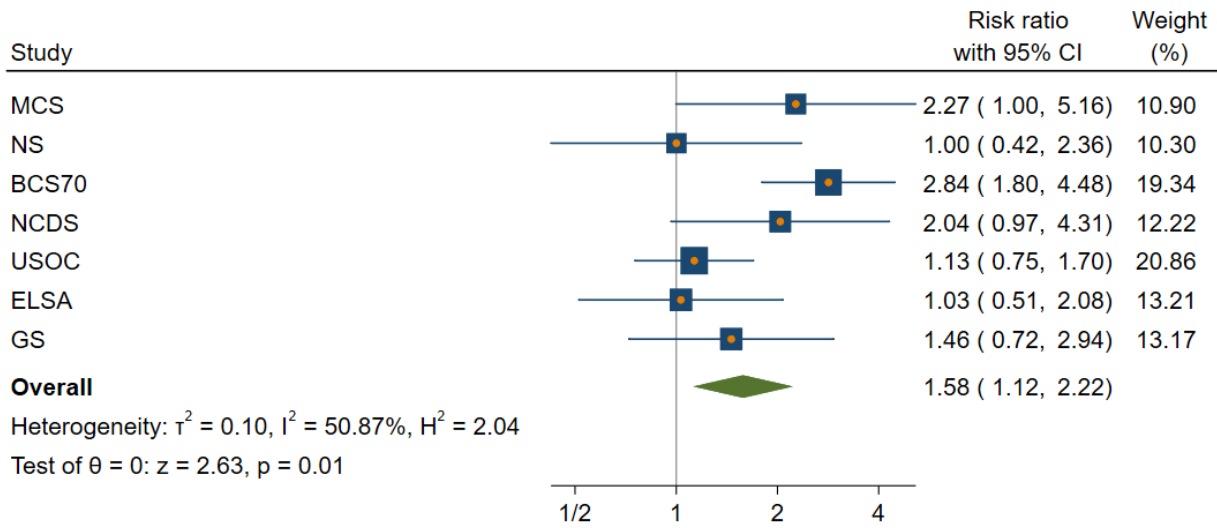

Random-effects REML model

Smoking more  
Furloughed vs. Stable employed

basic adjustment

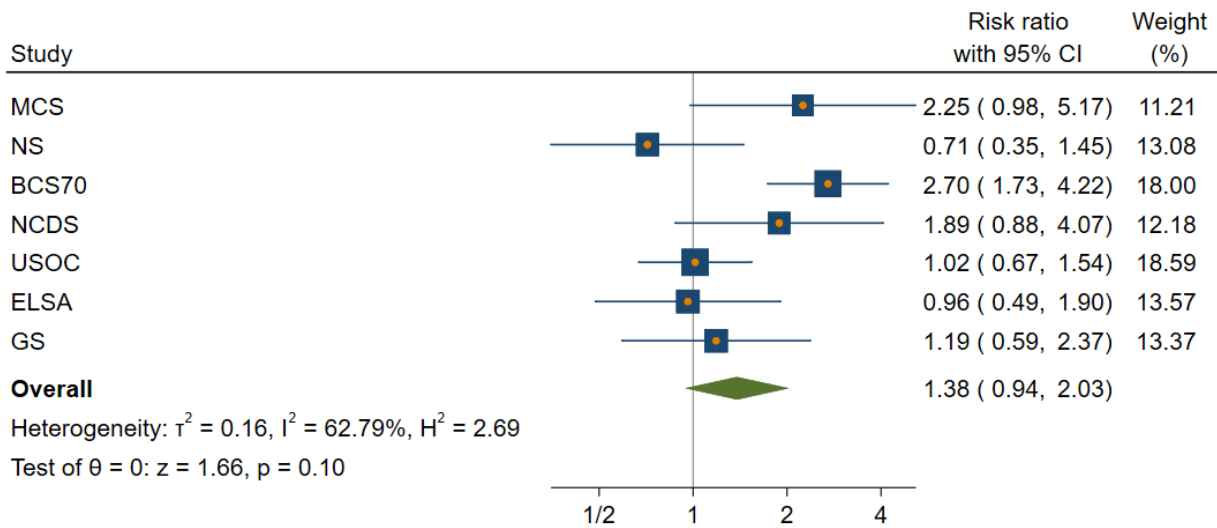

Random-effects REML model

Smoking more  
Furloughed vs. Stable employed

full adjustment

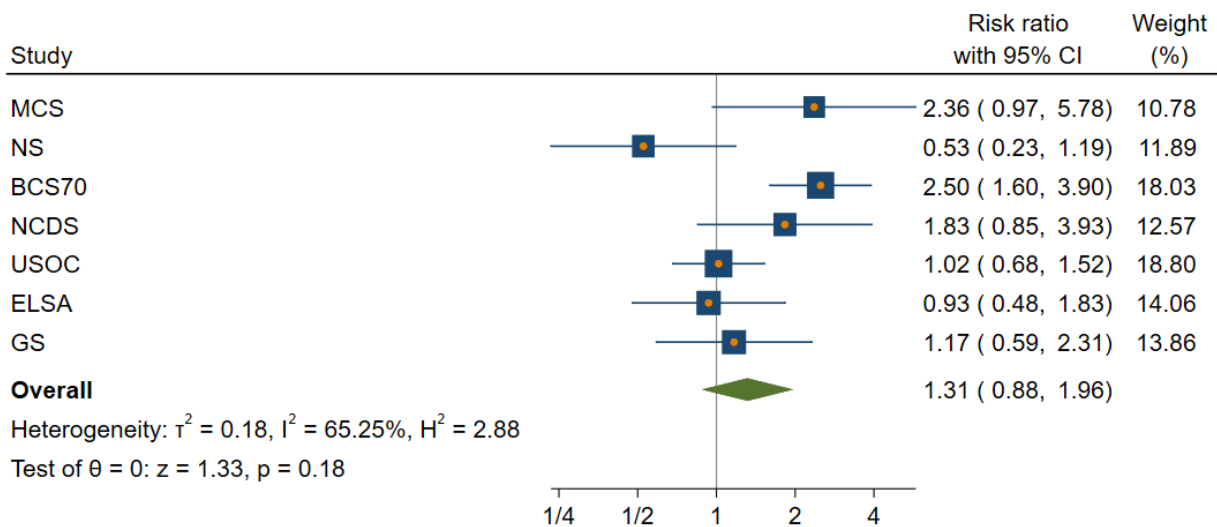

Random-effects REML model

Smoking more  
No longer employed vs. Stable employed

unadjusted

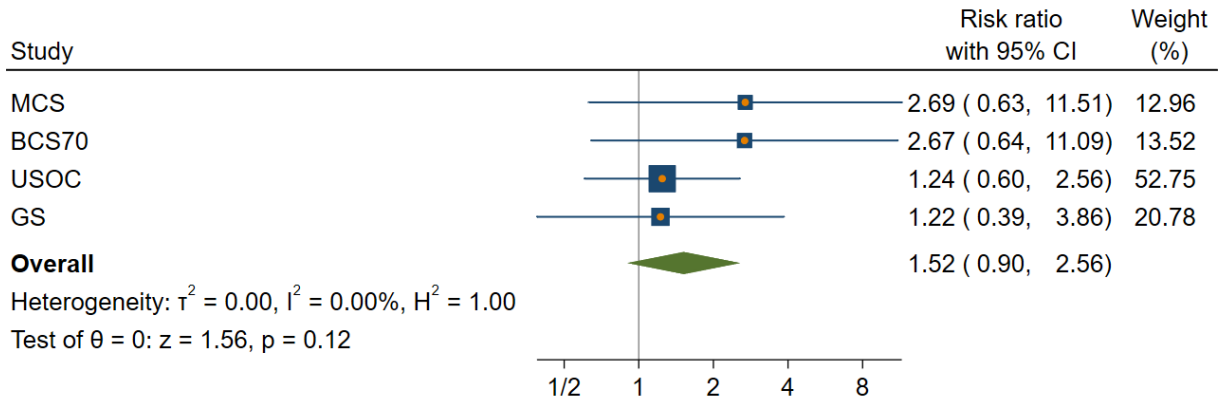

Random-effects REML model

Smoking more  
No longer employed vs. Stable employed

basic adjustment

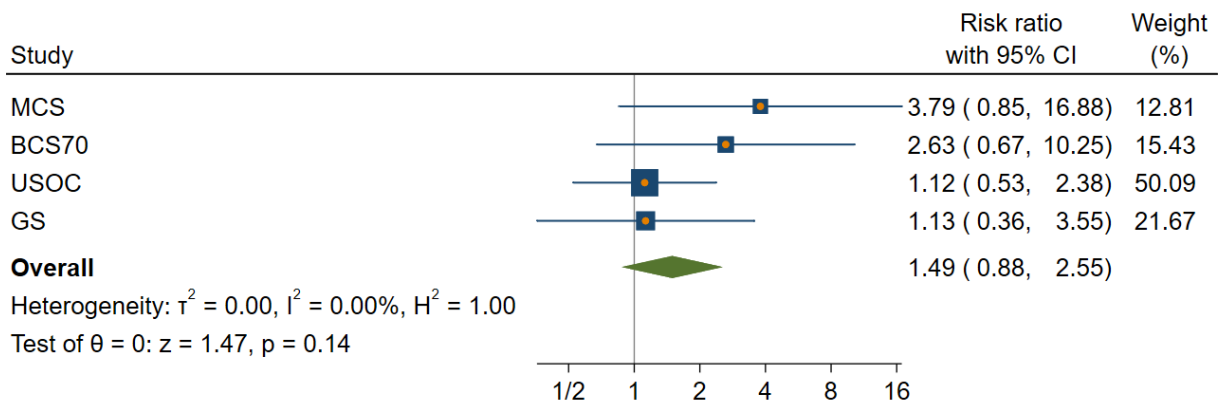

Random-effects REML model

Smoking more  
No longer employed vs. Stable employed

full adjustment

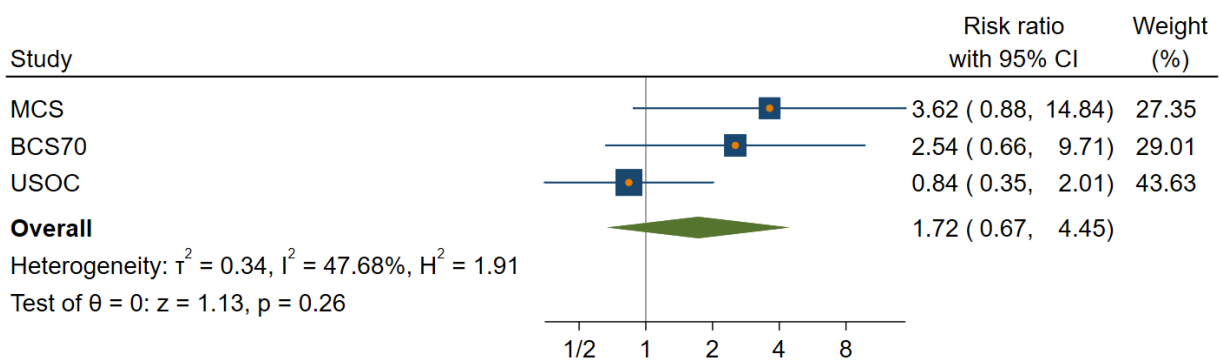

Random-effects REML model

Smoking more  
Stable unemployed vs. Stable employed

unadjusted

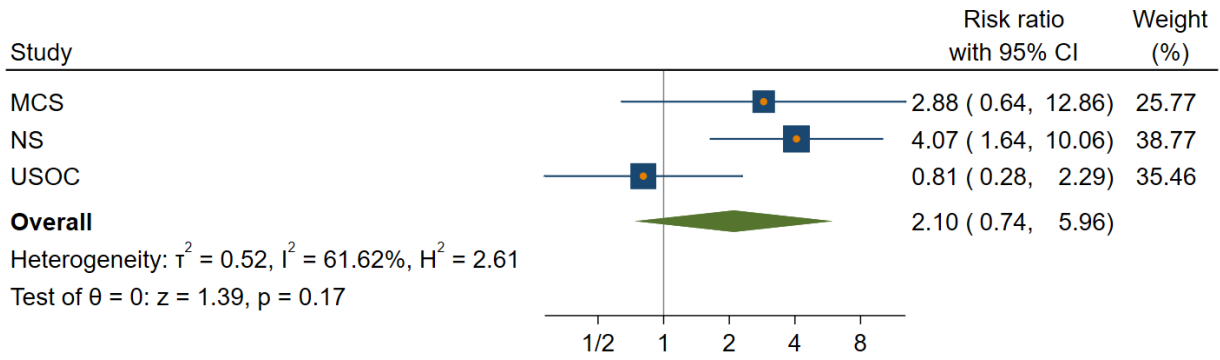

Random-effects REML model

Smoking more  
Stable unemployed vs. Stable employed

basic adjustment

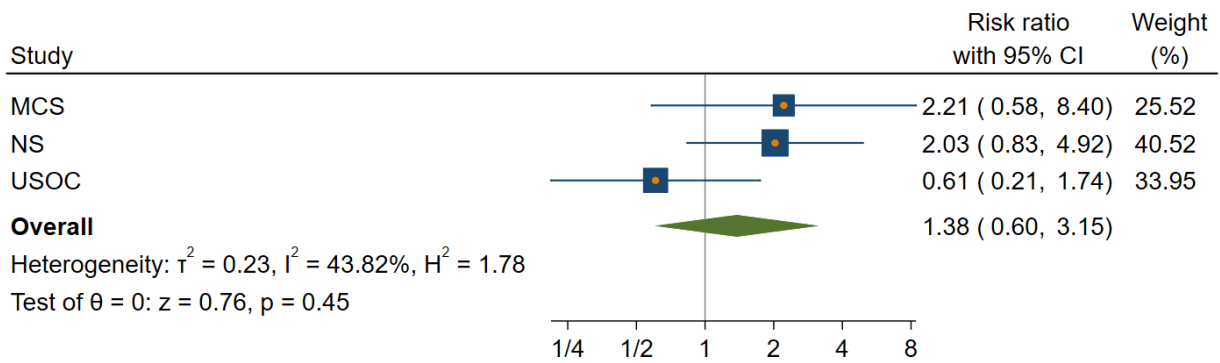

Random-effects REML model

Smoking more  
Stable unemployed vs. Stable employed

full adjustment

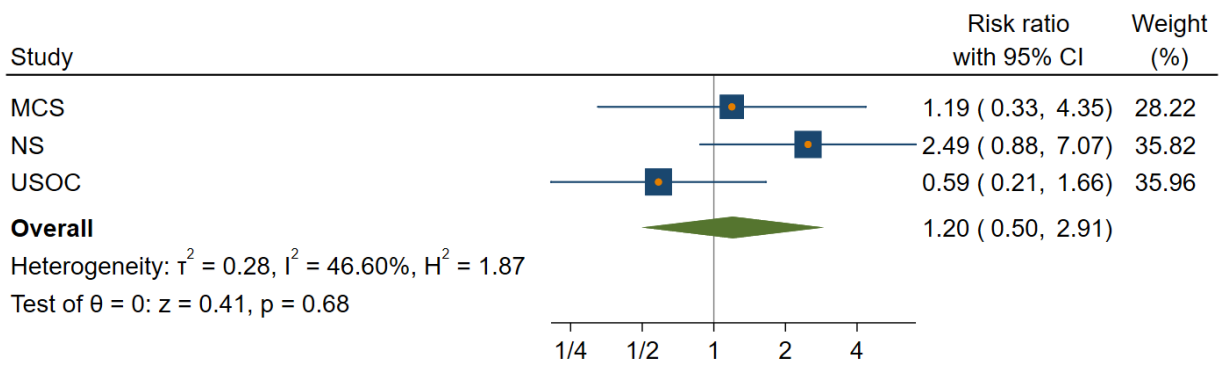

Random-effects REML model



## Figure set 12. Smoking less

Smoking less  
Furloughed vs. Stable employed

unadjusted

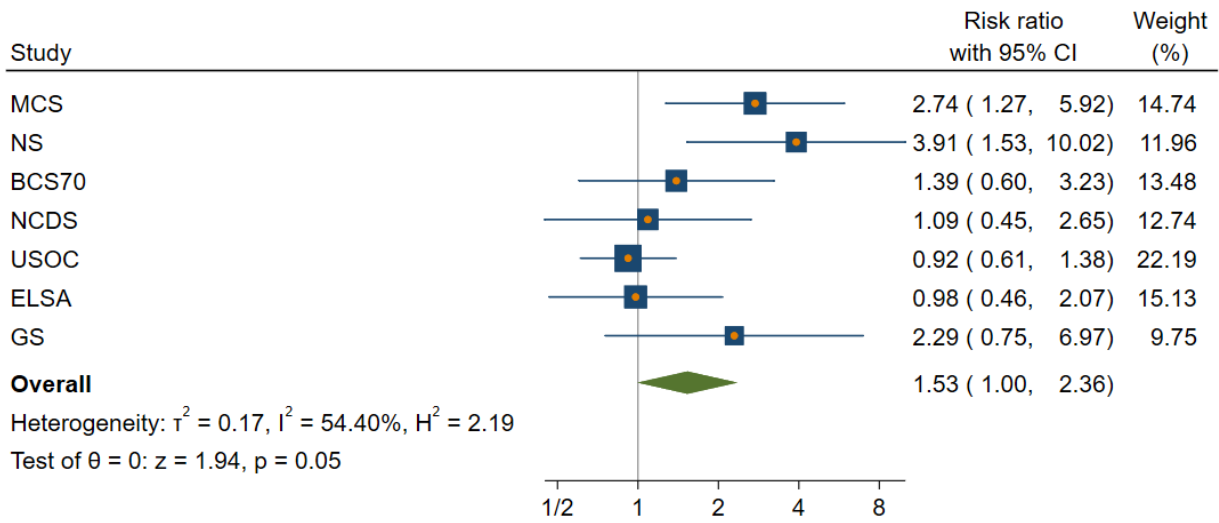

Random-effects REML model

Smoking less  
Furloughed vs. Stable employed

basic adjustment

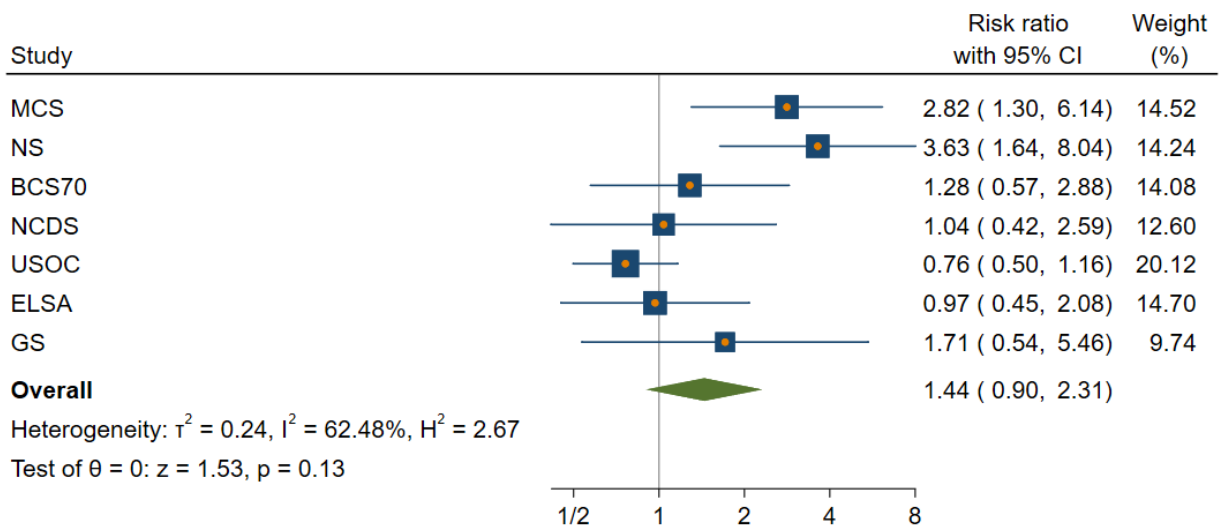

Random-effects REML model

Smoking less  
Furloughed vs. Stable employed

full adjustment

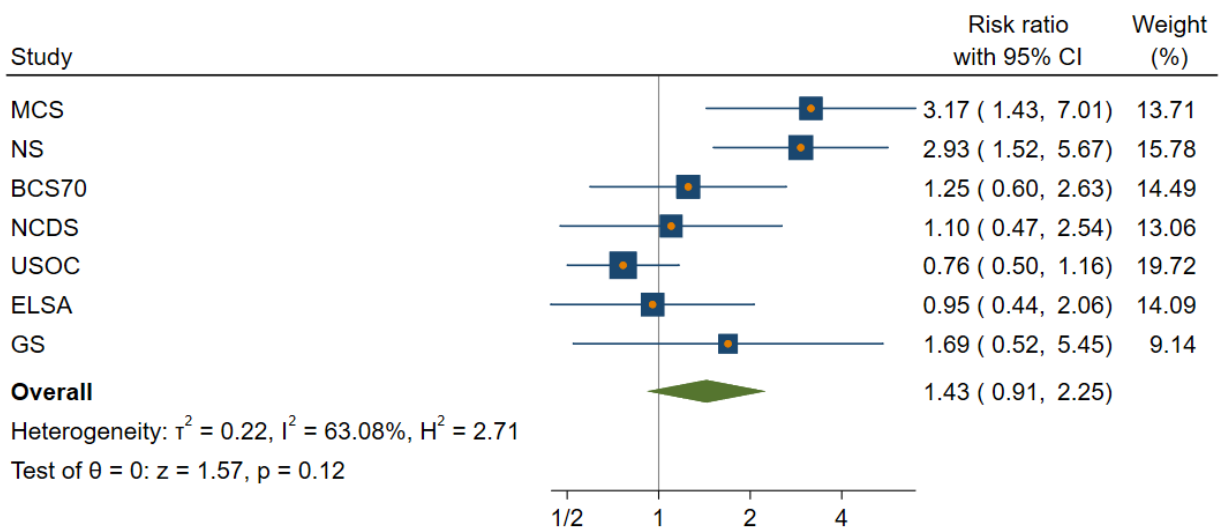

Random-effects REML model

Smoking less  
No longer employed vs. Stable employed

unadjusted

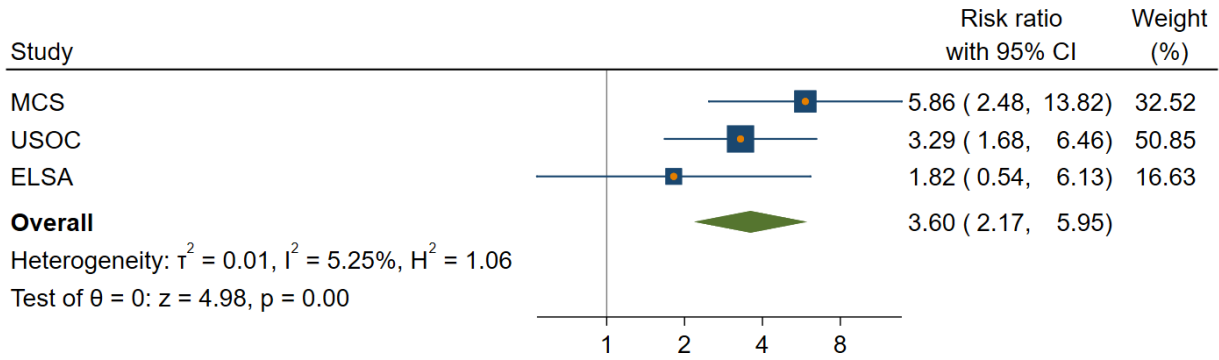

Random-effects REML model

Smoking less  
No longer employed vs. Stable employed

basic adjustment

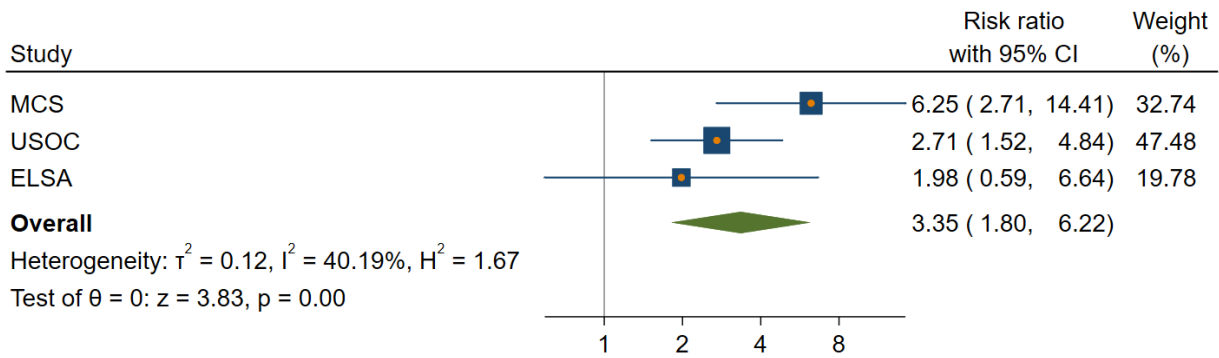

Random-effects REML model

Smoking less  
No longer employed vs. Stable employed

full adjustment

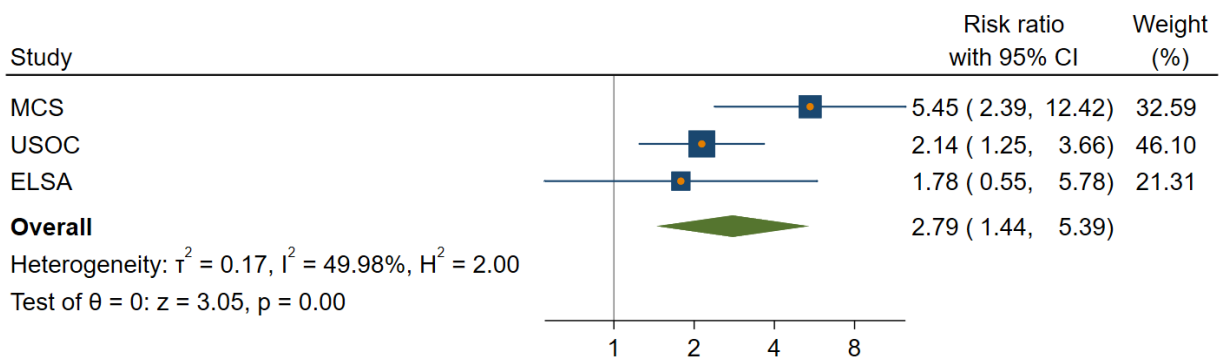

Random-effects REML model

Smoking less  
Stable unemployed vs. Stable employed

unadjusted

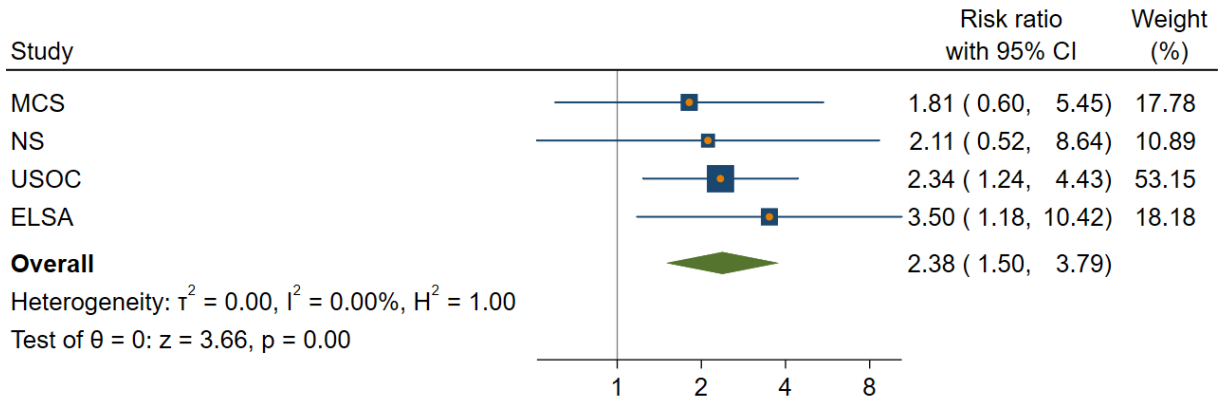

Random-effects REML model

Smoking less  
Stable unemployed vs. Stable employed

basic adjustment

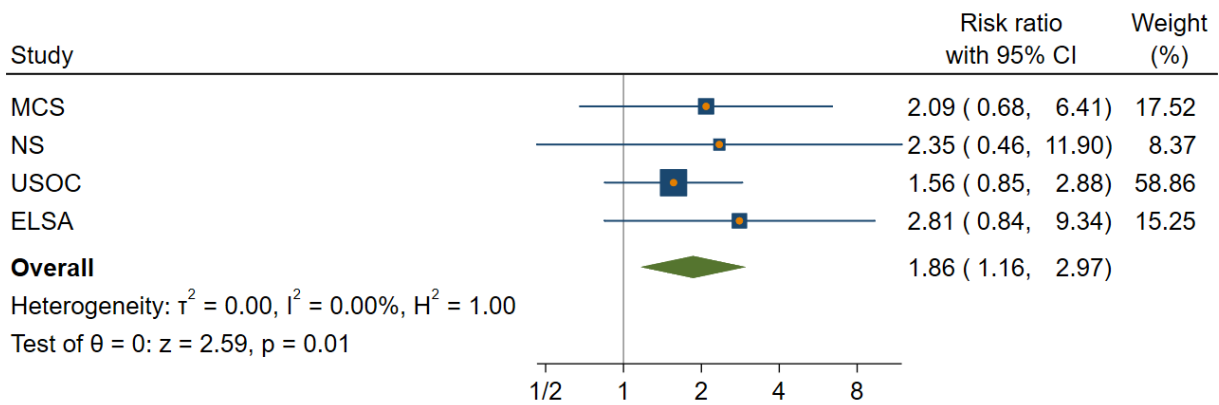

Random-effects REML model

Smoking less  
Stable unemployed vs. Stable employed

full adjustment

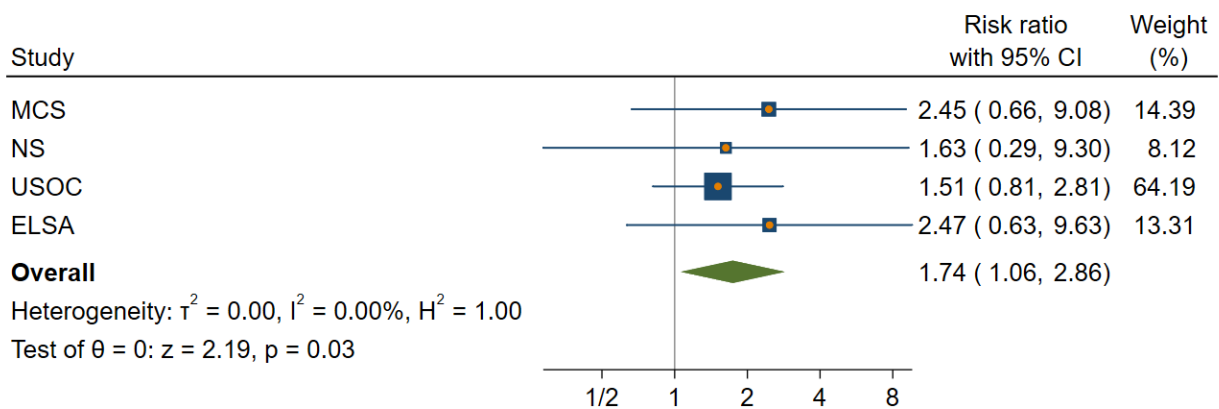

Random-effects REML model

## Figure set 13. Current vaper

### Current vaper Furloughed vs. Stable employed

unadjusted

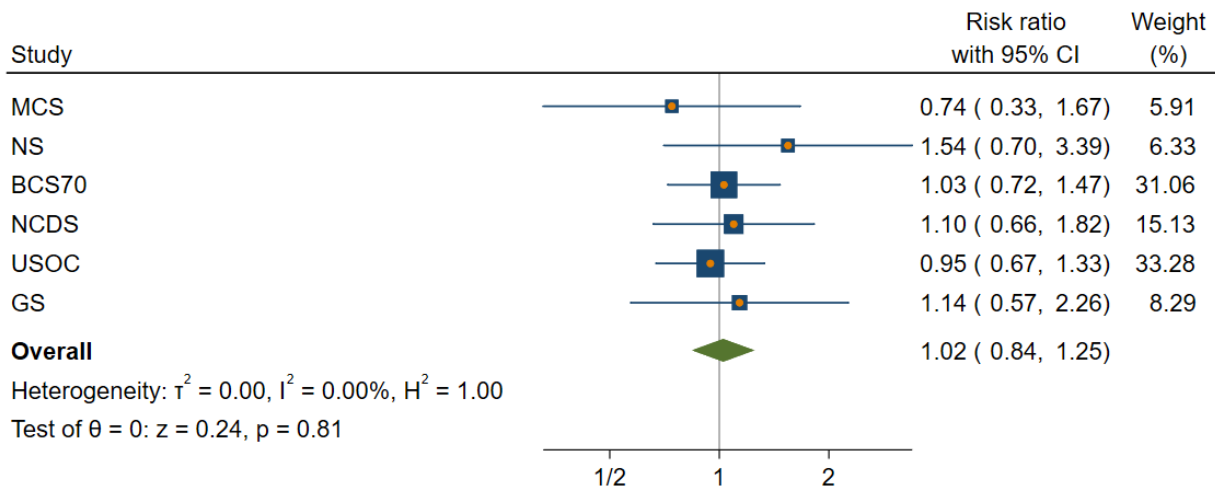

Random-effects REML model

### Current vaper Furloughed vs. Stable employed

basic adjustment

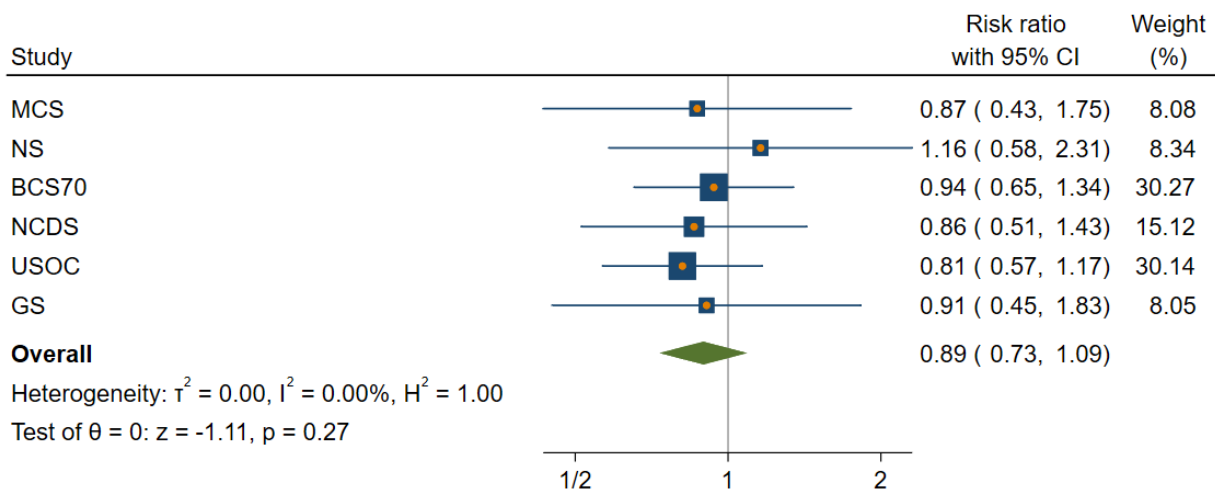

Random-effects REML model

### Current vaper Furloughed vs. Stable employed

full adjustment

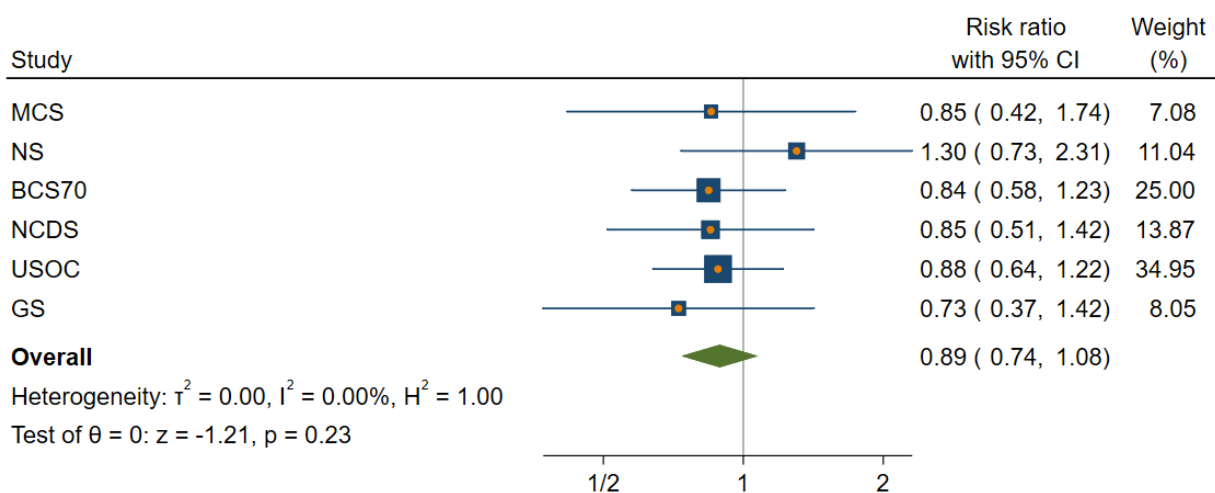

Random-effects REML model

Current vaper  
No longer employed vs. Stable employed

unadjusted

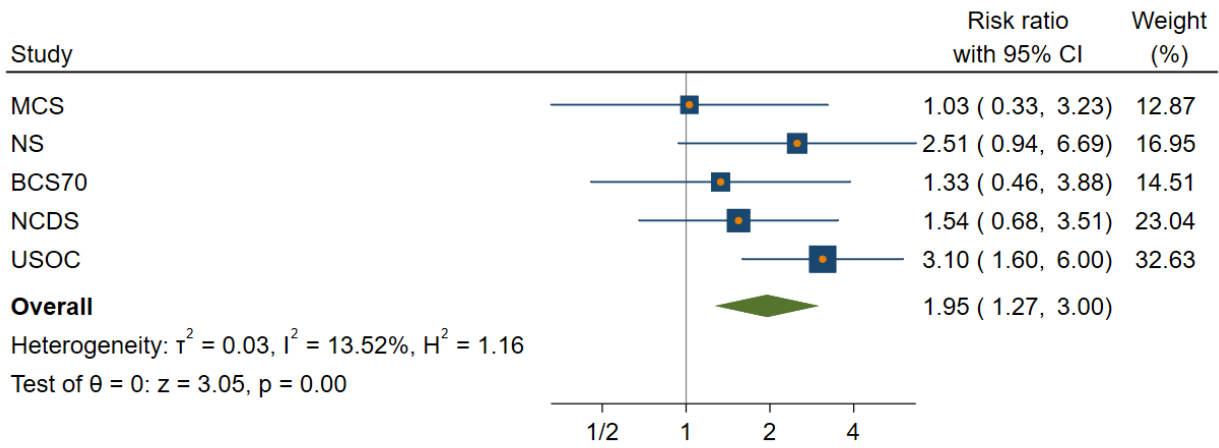

Random-effects REML model

Current vaper  
No longer employed vs. Stable employed

basic adjustment

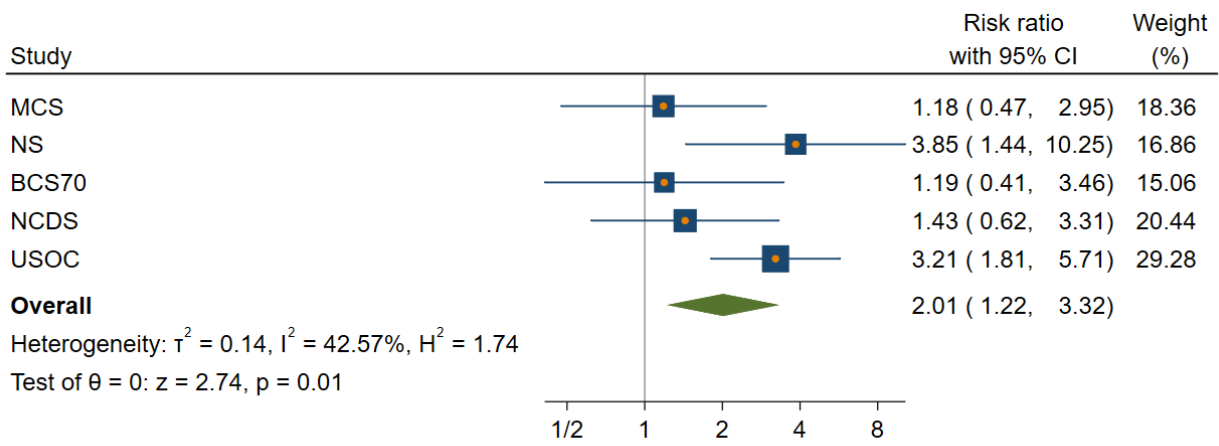

Random-effects REML model

Current vaper  
No longer employed vs. Stable employed

full adjustment

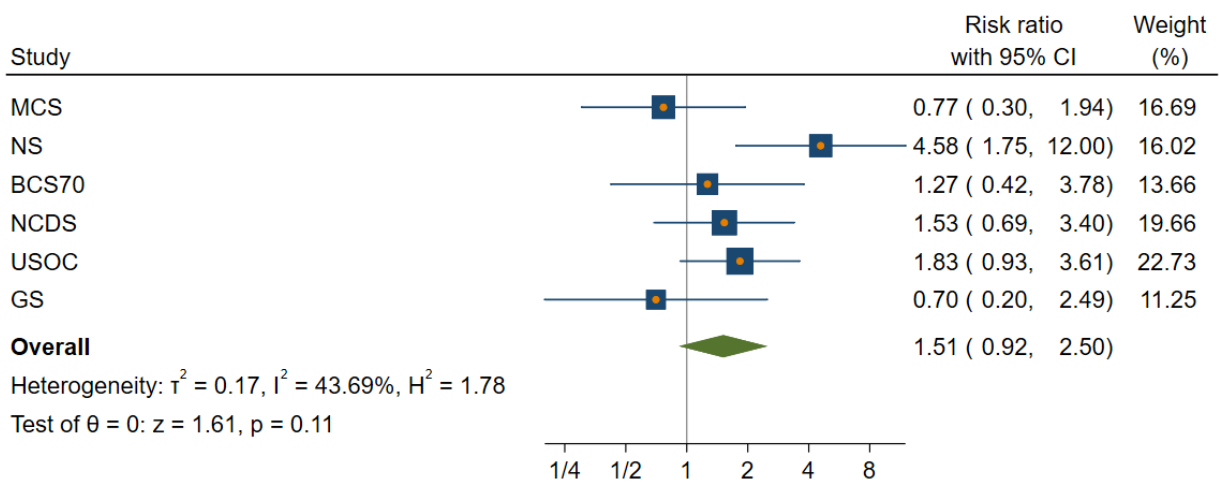

Random-effects REML model

Current vaper  
Stable unemployed vs. Stable employed

unadjusted

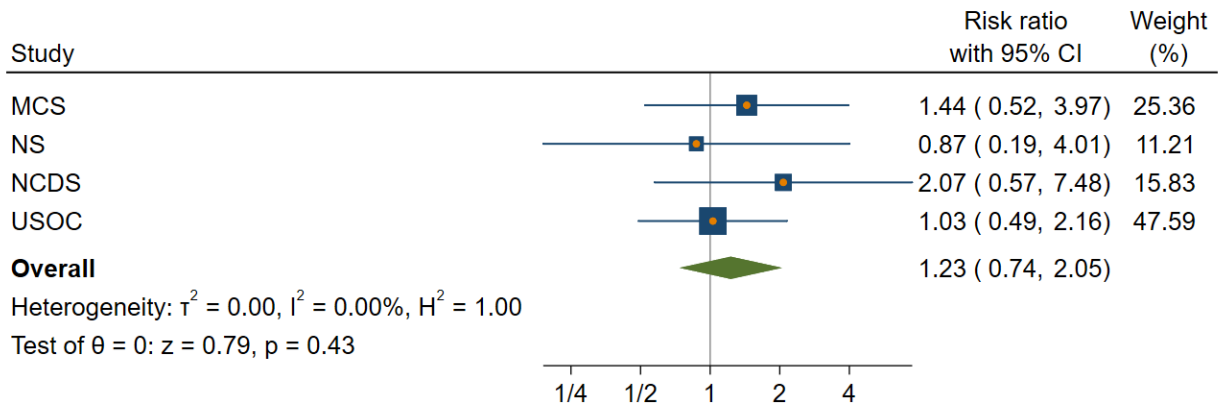

Random-effects REML model

Current vaper  
Stable unemployed vs. Stable employed

basic adjustment

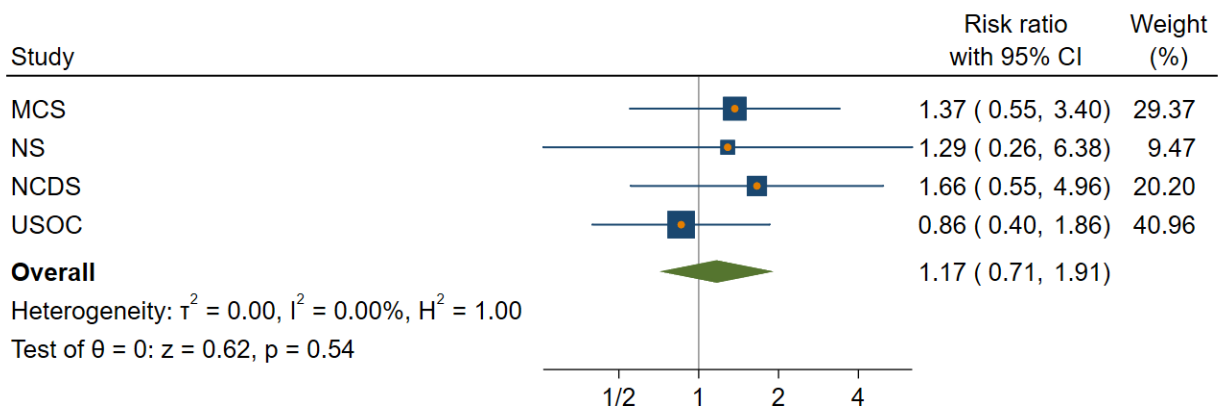

Random-effects REML model

Current vaper  
Stable unemployed vs. Stable employed

full adjustment

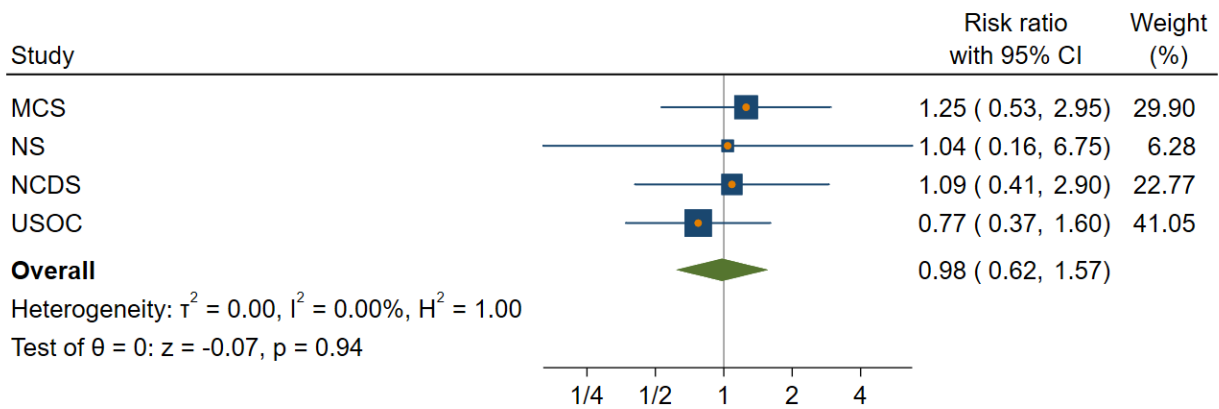

Random-effects REML model

## Figure set 14. Vaping more

Vaping more  
Furloughed vs. Stable employed  
unadjusted

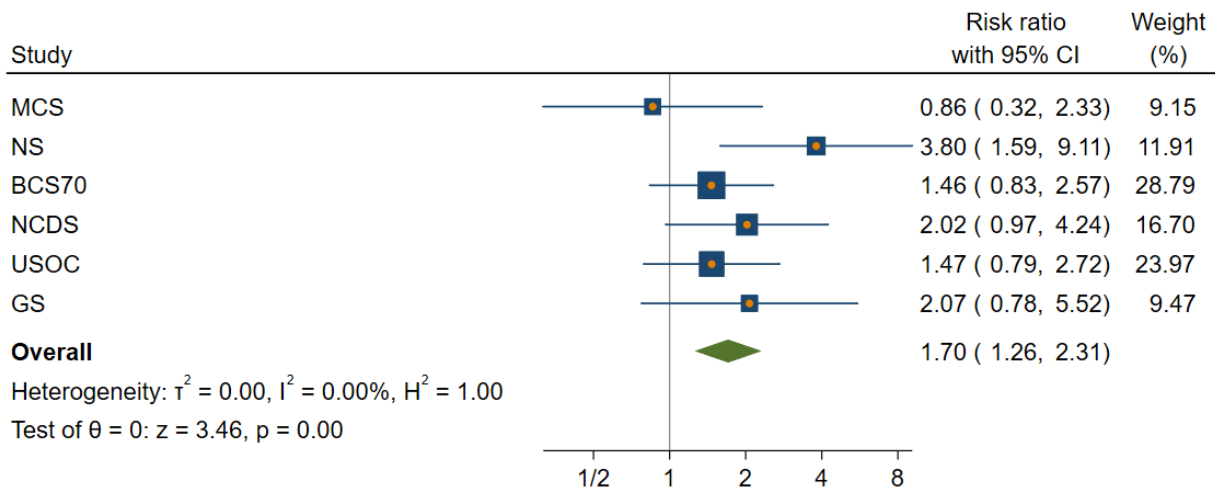

Random-effects REML model

Vaping more  
Furloughed vs. Stable employed  
basic adjustment

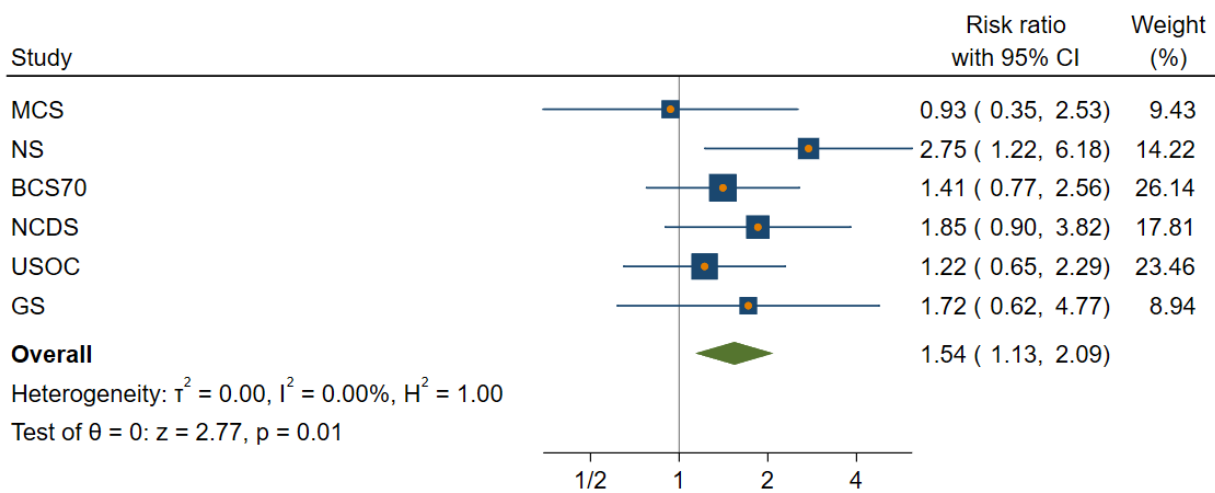

Random-effects REML model

Vaping more  
Furloughed vs. Stable employed  
full adjustment

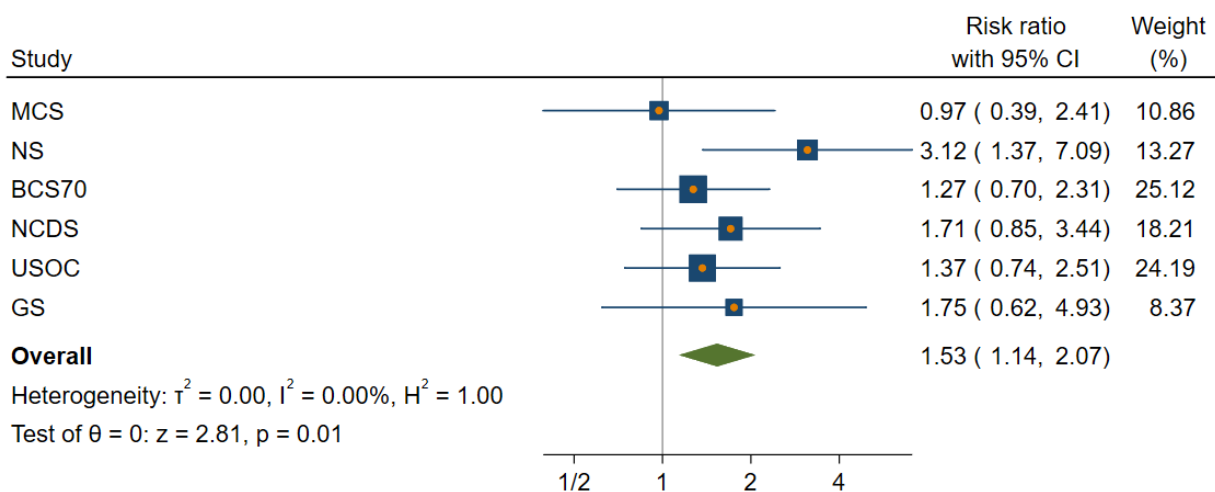

Random-effects REML model

Vaping more  
No longer employed vs. Stable employed

unadjusted

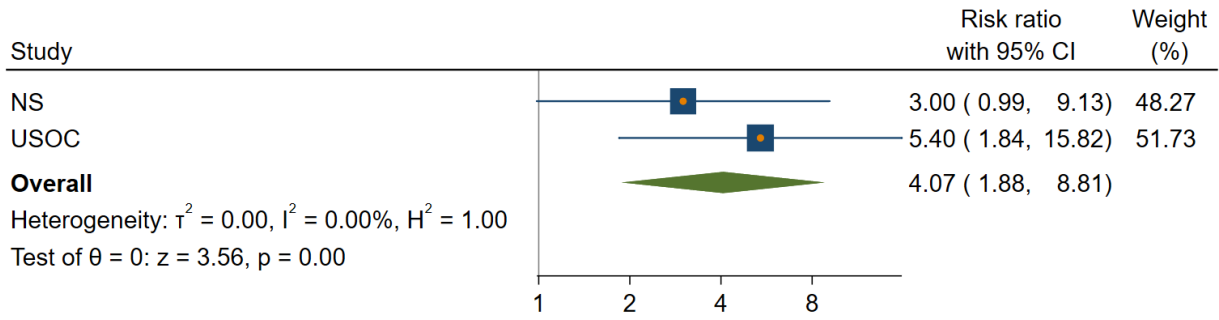

Random-effects REML model

Vaping more  
No longer employed vs. Stable employed

basic adjustment

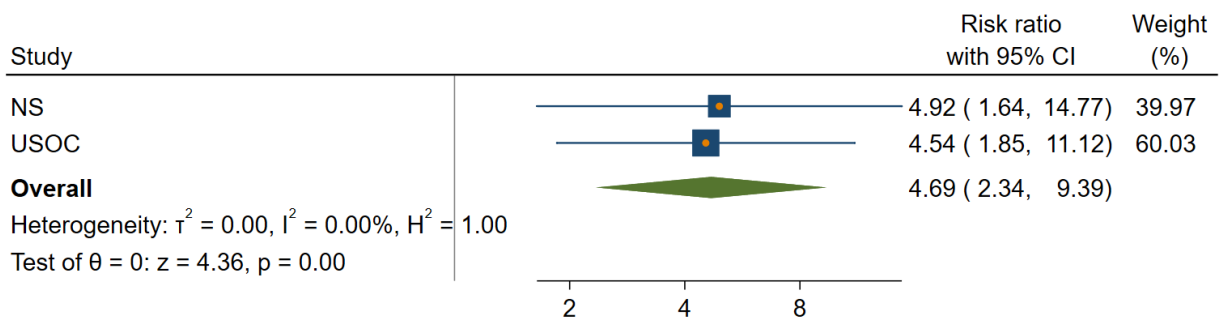

Random-effects REML model

Vaping more  
No longer employed vs. Stable employed

full adjustment

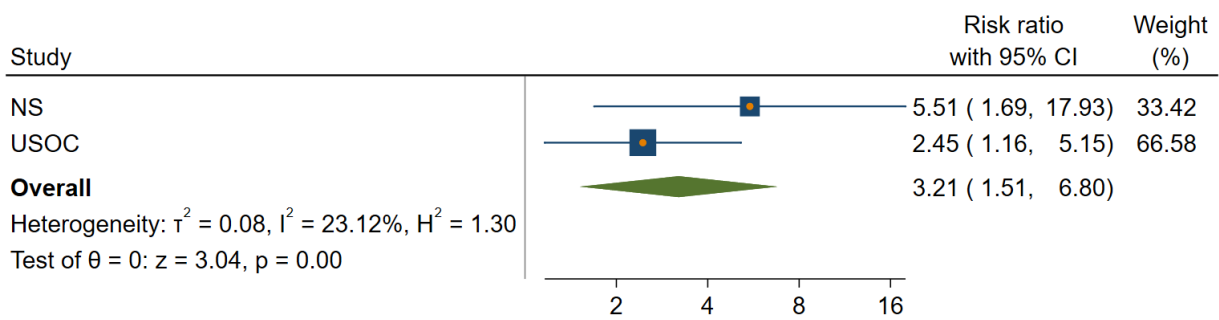

Random-effects REML model



Vaping more  
Stable unemployed vs. Stable employed

unadjusted

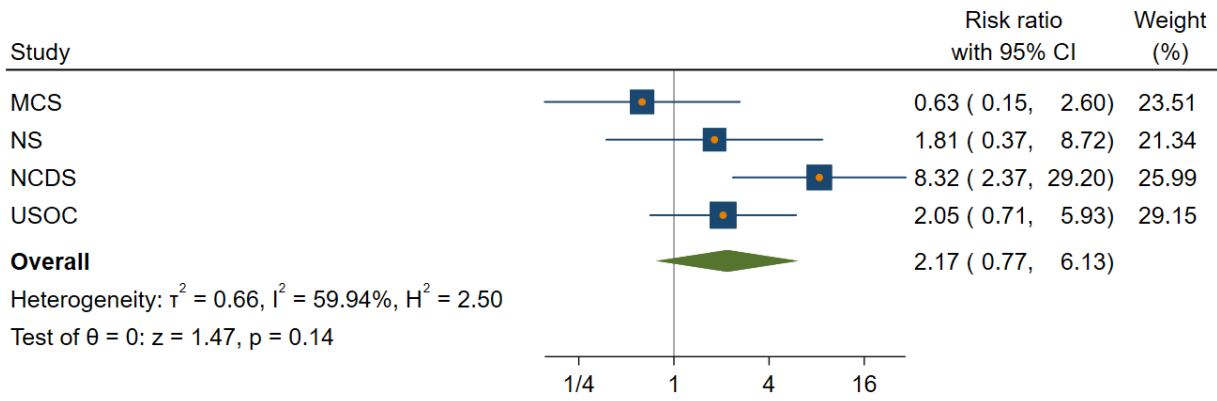

Random-effects REML model

Vaping more  
Stable unemployed vs. Stable employed

basic adjustment

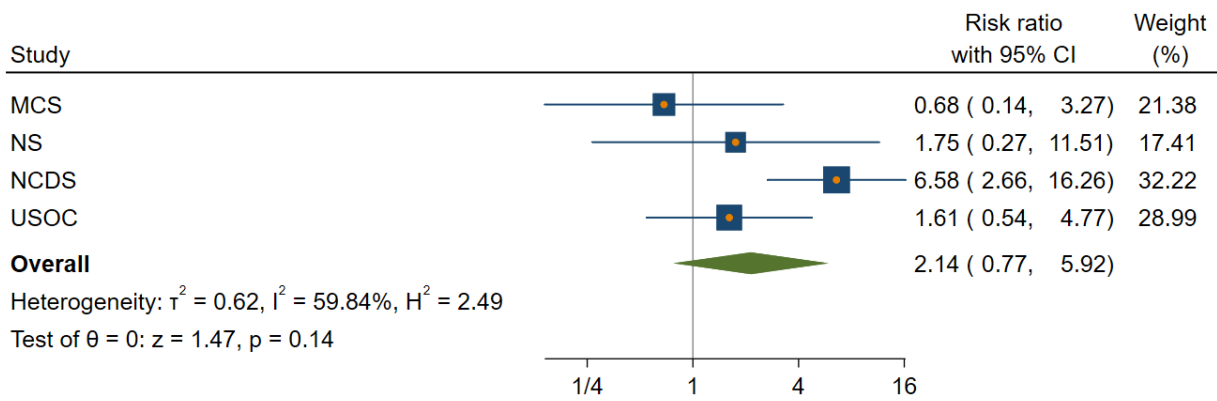

Random-effects REML model

Vaping more  
Stable unemployed vs. Stable employed

full adjustment

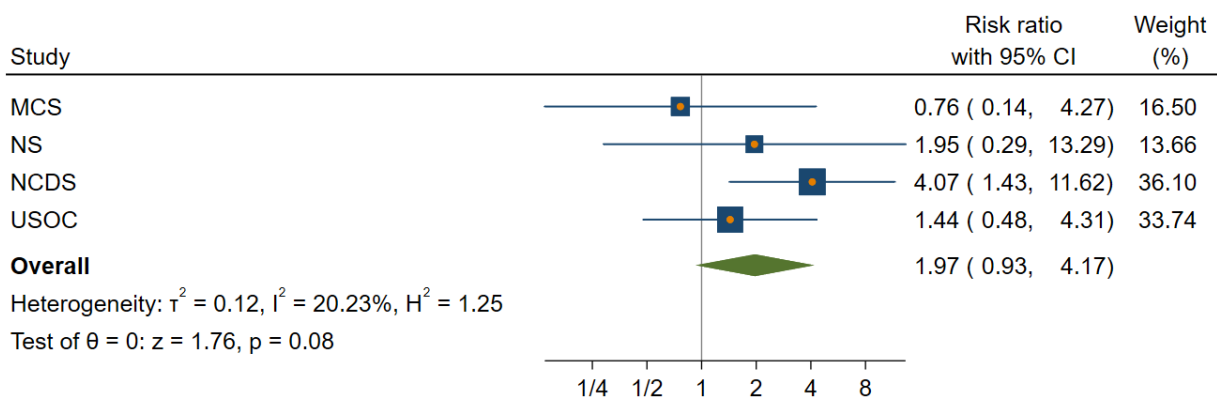

Random-effects REML model

## Figure set 15. Vaping less

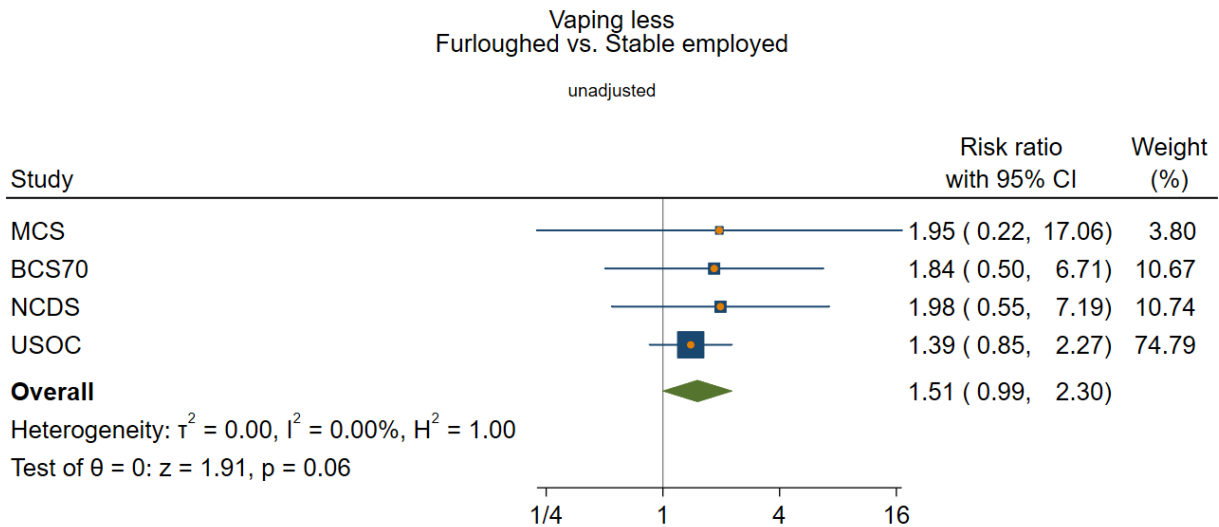

Random-effects REML model

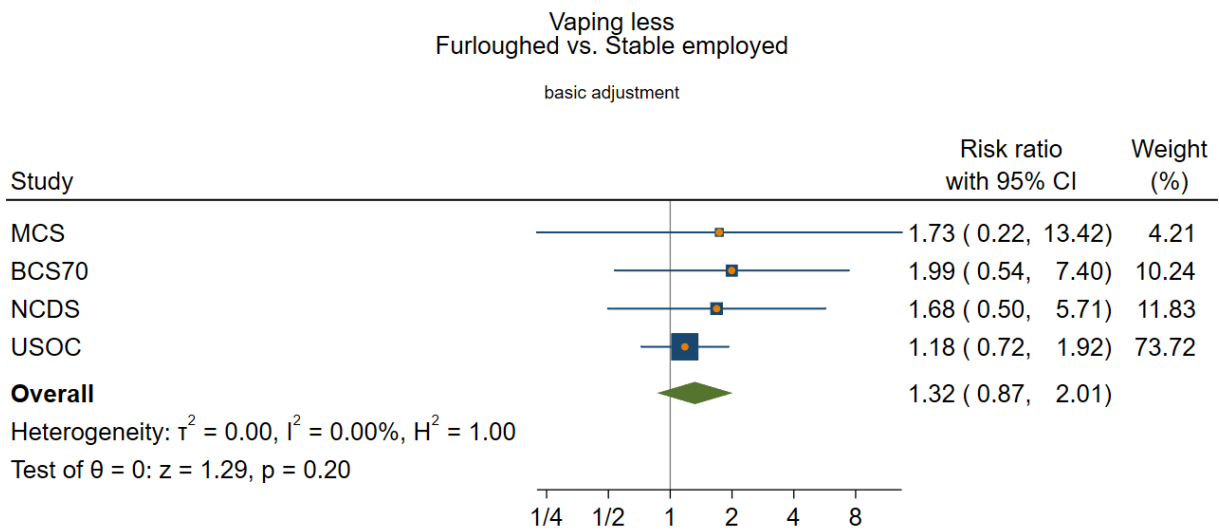

Random-effects REML model

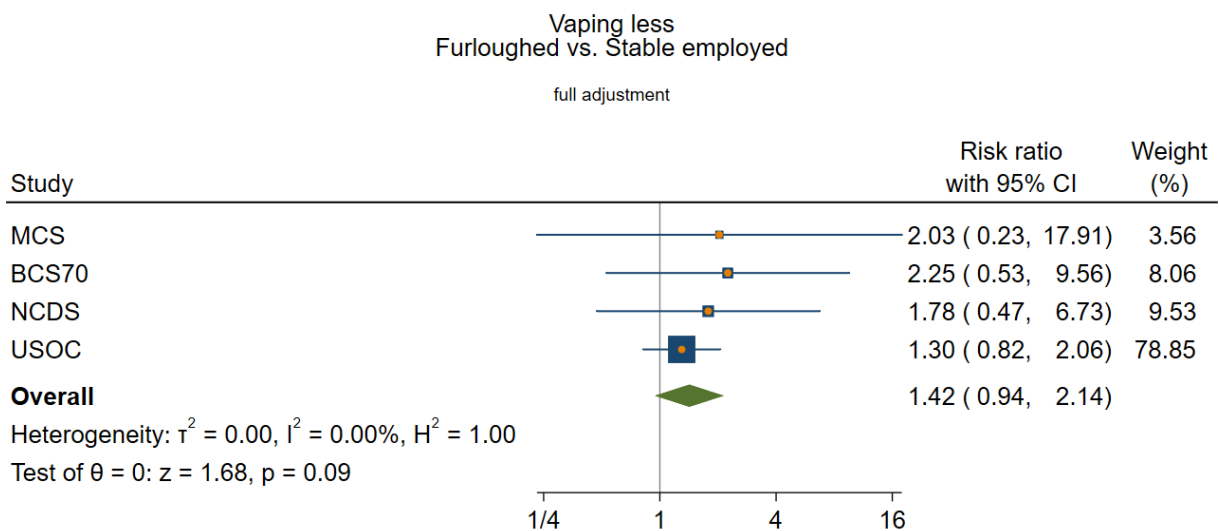

Random-effects REML model

Vaping less  
No longer employed vs. Stable employed

unadjusted

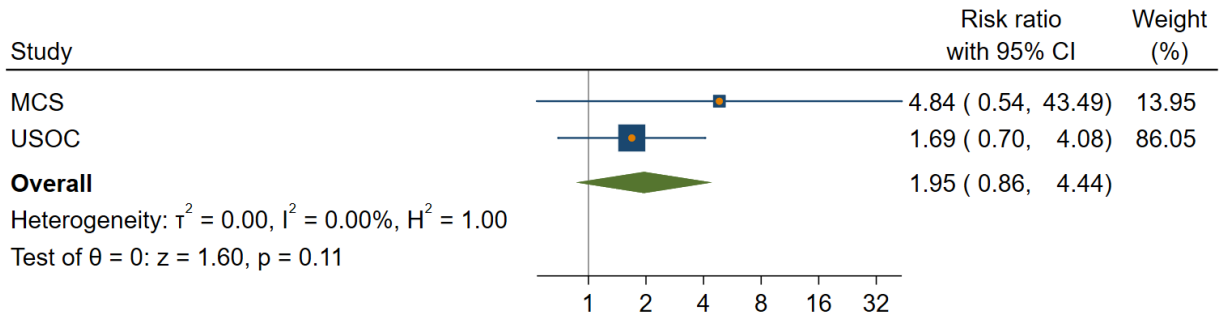

Random-effects REML model

Vaping less  
No longer employed vs. Stable employed

basic adjustment

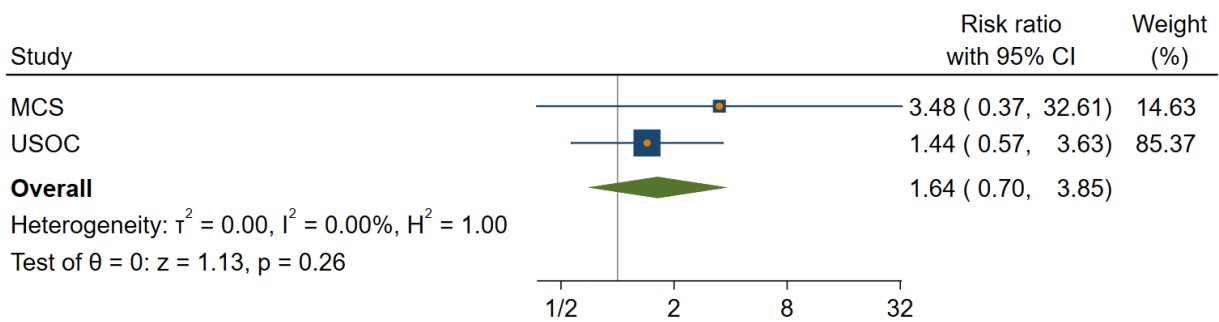

Random-effects REML model

Vaping less  
No longer employed vs. Stable employed

full adjustment

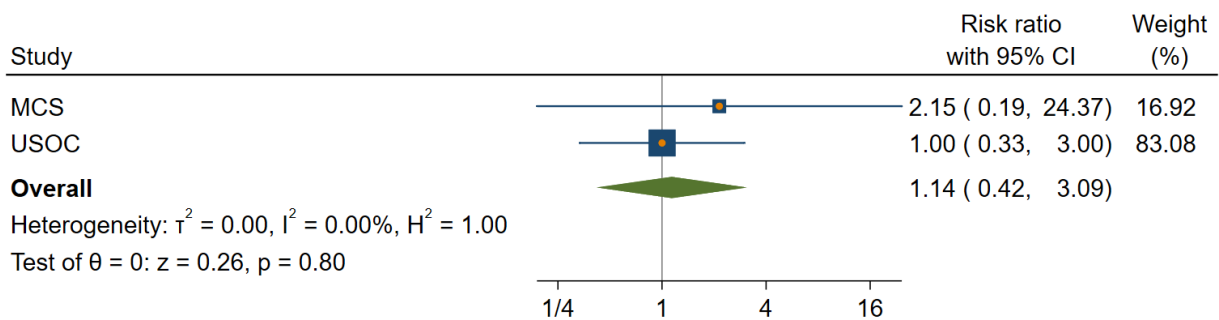

Random-effects REML model

Vaping less  
Stable unemployed vs. Stable employed  
unadjusted

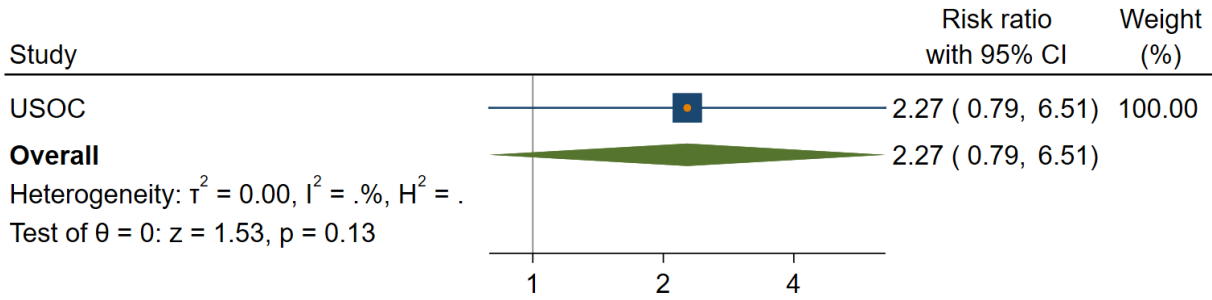

Random-effects REML model

Vaping less  
Stable unemployed vs. Stable employed  
basic adjustment

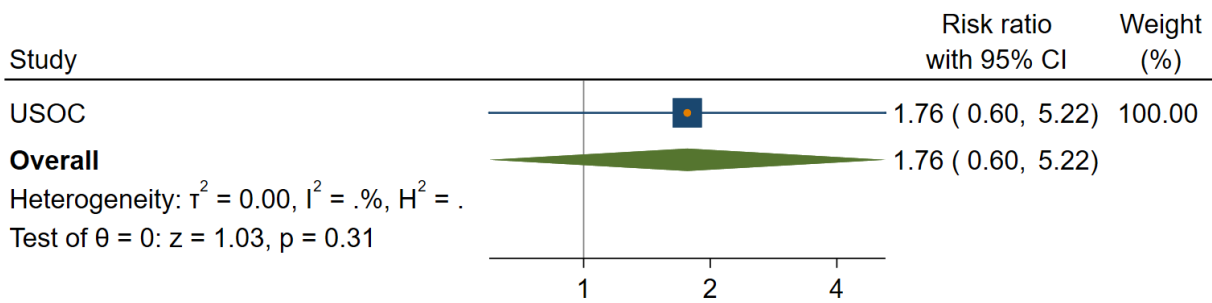

Random-effects REML model

Vaping less  
Stable unemployed vs. Stable employed  
full adjustment

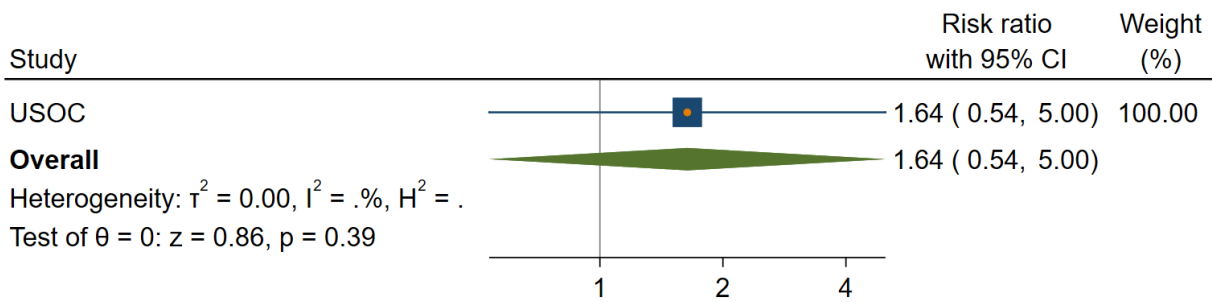

Random-effects REML model
